# Supplementary material for: Catalyst-free formation of 1,4-diketones by addition of silyl enolates to oxyallyl zwitterions in situ generated from α-haloketones
Source: Royal Society of Chemistry journal article supplement (doi:10.1039/c5ra12244a), 2015-01-01

## Catalyst-free Formation of 1,4-Diketones by Addition of Silyl Enolates to Oxyallyl Zwitterions *in situ*

### Generated from $\alpha$ -Haloketones

Juan Luo, Qihua Jiang, Hao Chen, and Qiang Tang\*

#### Table of Contents

|                                                                                                                                                                                                               |        |
|---------------------------------------------------------------------------------------------------------------------------------------------------------------------------------------------------------------|--------|
| Compound <b>3a</b> : <sup>1</sup> H NMR, <sup>13</sup> C NMR, DEPT135, HMQC, H-H COSY, HMBC, and IR spectra                                                                                                   | S2-8   |
| Compound <b>3b</b> : <sup>1</sup> H NMR and <sup>13</sup> C NMR spectra                                                                                                                                       | S9-10  |
| Compound <b>3c</b> : <sup>1</sup> H NMR, <sup>13</sup> C NMR, and IR spectra                                                                                                                                  | S11-13 |
| Compound <b>3d</b> : <sup>1</sup> H NMR and <sup>13</sup> C NMR spectra                                                                                                                                       | S14-15 |
| Compound <b>3e</b> : <sup>1</sup> H NMR, <sup>13</sup> C NMR, and IR spectra for two isolated isomers                                                                                                         | S16-21 |
| Compound <b>3f</b> : <sup>1</sup> H NMR, <sup>13</sup> C NMR, and IR spectra                                                                                                                                  | S22-24 |
| Compound <b>3g</b> : <sup>1</sup> H NMR and <sup>13</sup> C NMR spectra                                                                                                                                       | S25-26 |
| Compound <b>3h</b> : <sup>1</sup> H NMR and <sup>13</sup> C NMR spectra                                                                                                                                       | S27-28 |
| Compound <b>3i</b> : <sup>1</sup> H NMR and <sup>13</sup> C NMR spectra                                                                                                                                       | S29-30 |
| Compound <b>3j</b> : <sup>1</sup> H NMR, <sup>13</sup> C NMR, DEPT135, HMQC, H-H COSY, HMBC and IR spectra for the upper isomer; <sup>1</sup> H NMR, <sup>13</sup> C NMR, and IR spectra for the lower isomer | S31-40 |
| Compound <b>3k</b> : <sup>1</sup> H NMR, <sup>13</sup> C NMR, and IR spectra for two isolated isomers                                                                                                         | S41-46 |
| Compound <b>3l</b> : <sup>1</sup> H NMR, <sup>13</sup> C NMR, and IR spectra                                                                                                                                  | S47-49 |
| Compound <b>3m</b> : <sup>1</sup> H NMR and <sup>13</sup> C NMR spectra                                                                                                                                       | S50-51 |
| Compound <b>3n</b> : <sup>1</sup> H NMR, <sup>13</sup> C NMR, and IR spectra                                                                                                                                  | S52-54 |
| Compound <b>3o</b> : <sup>1</sup> H NMR, <sup>13</sup> C NMR, and IR spectra                                                                                                                                  | S55-57 |
| Compound <b>3p</b> : <sup>1</sup> H NMR and <sup>13</sup> C NMR spectra                                                                                                                                       | S58-59 |
| Compound <b>3q</b> : <sup>1</sup> H NMR, <sup>13</sup> C NMR, H-H COSY, and IR spectra                                                                                                                        | S60-63 |

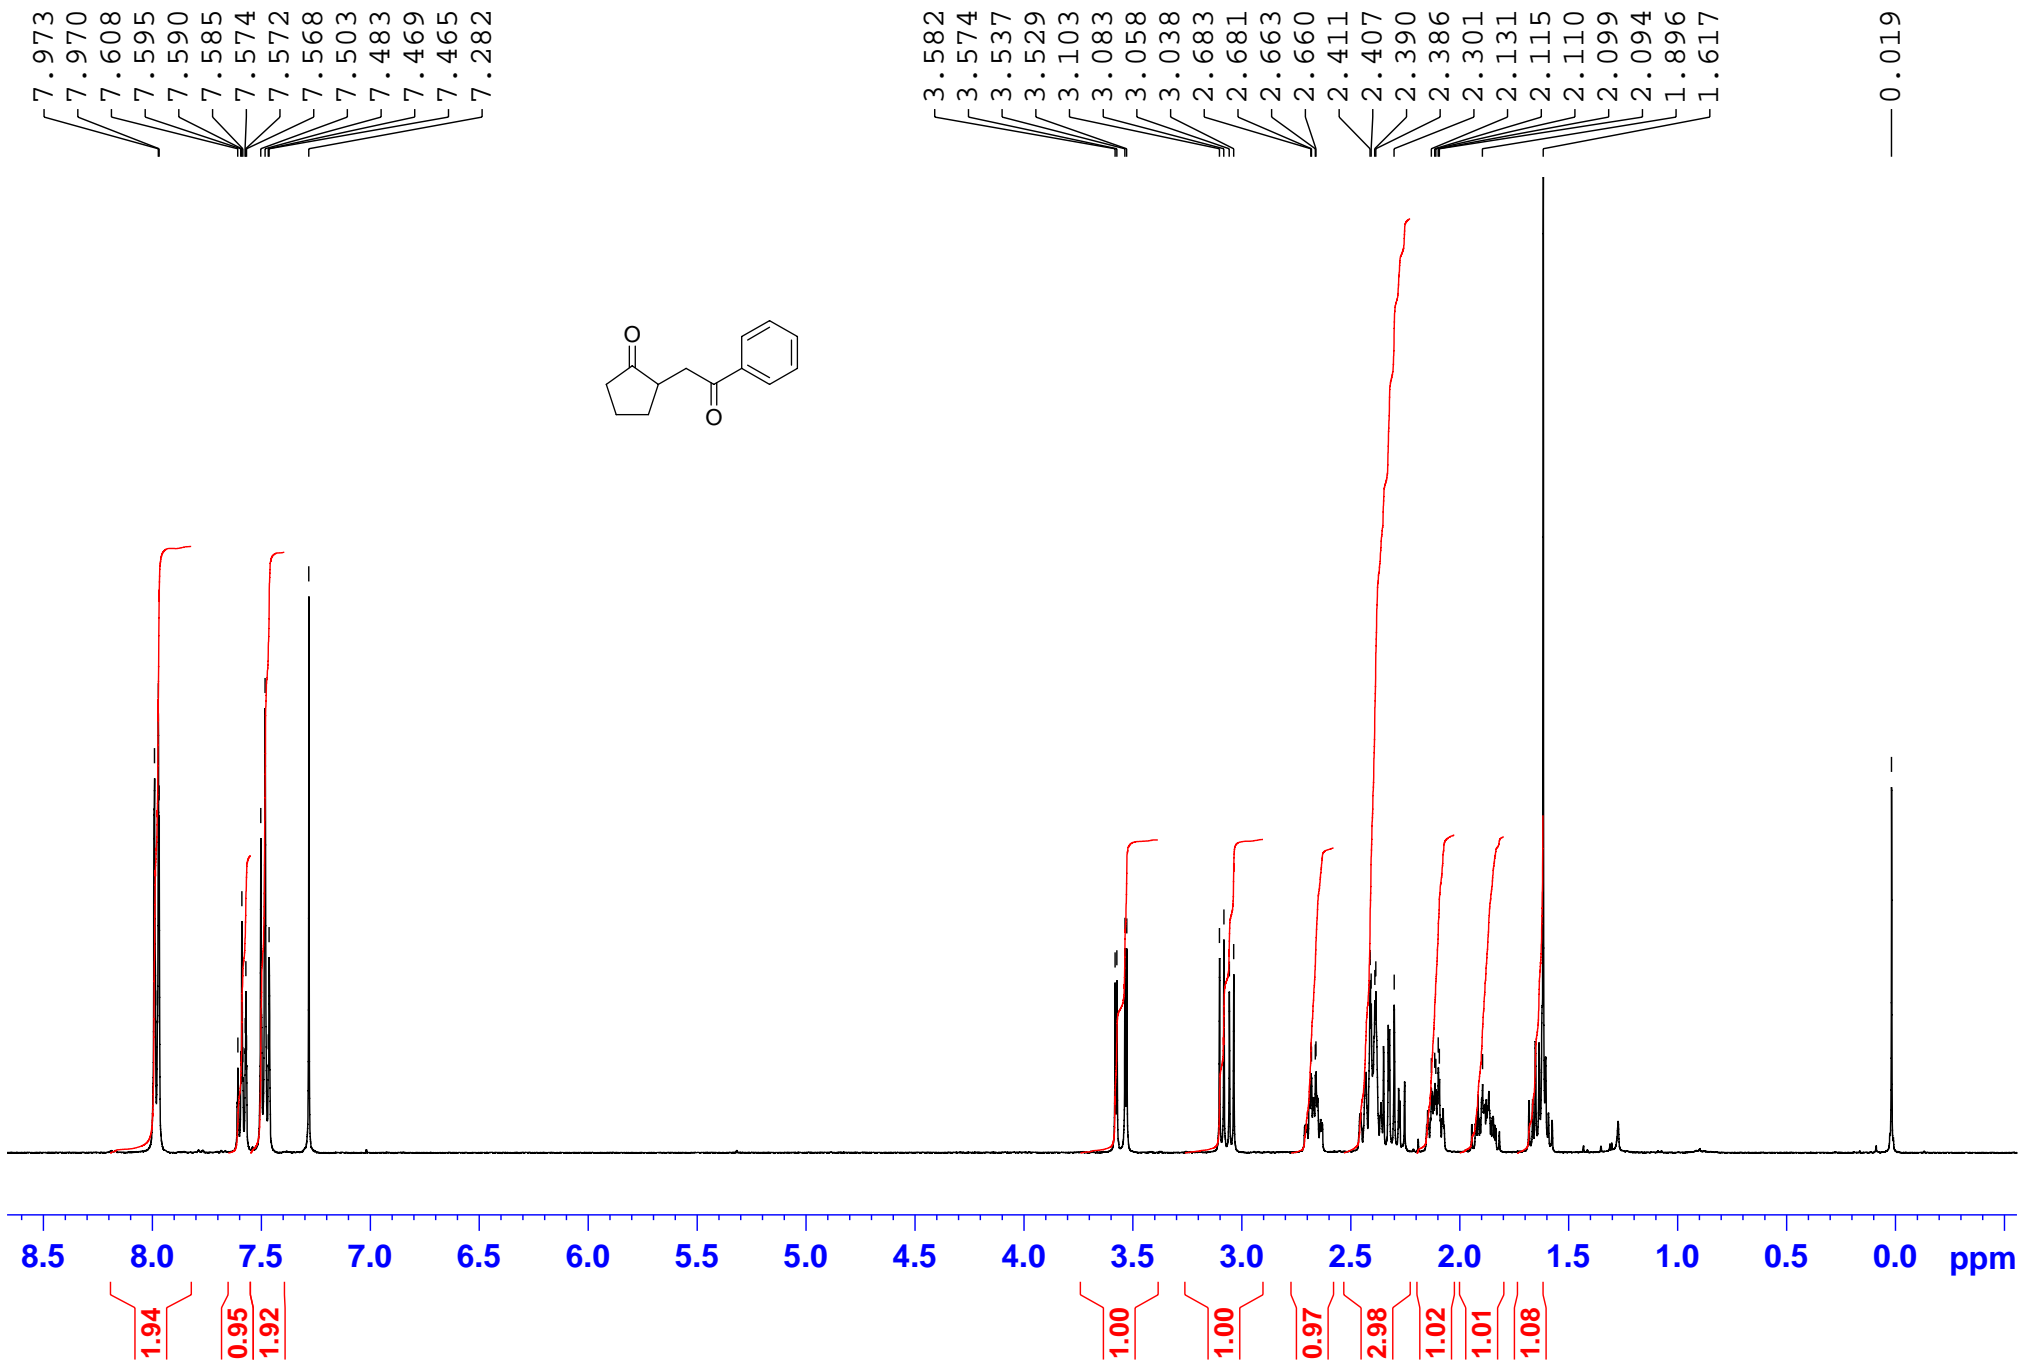

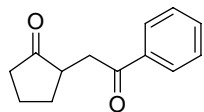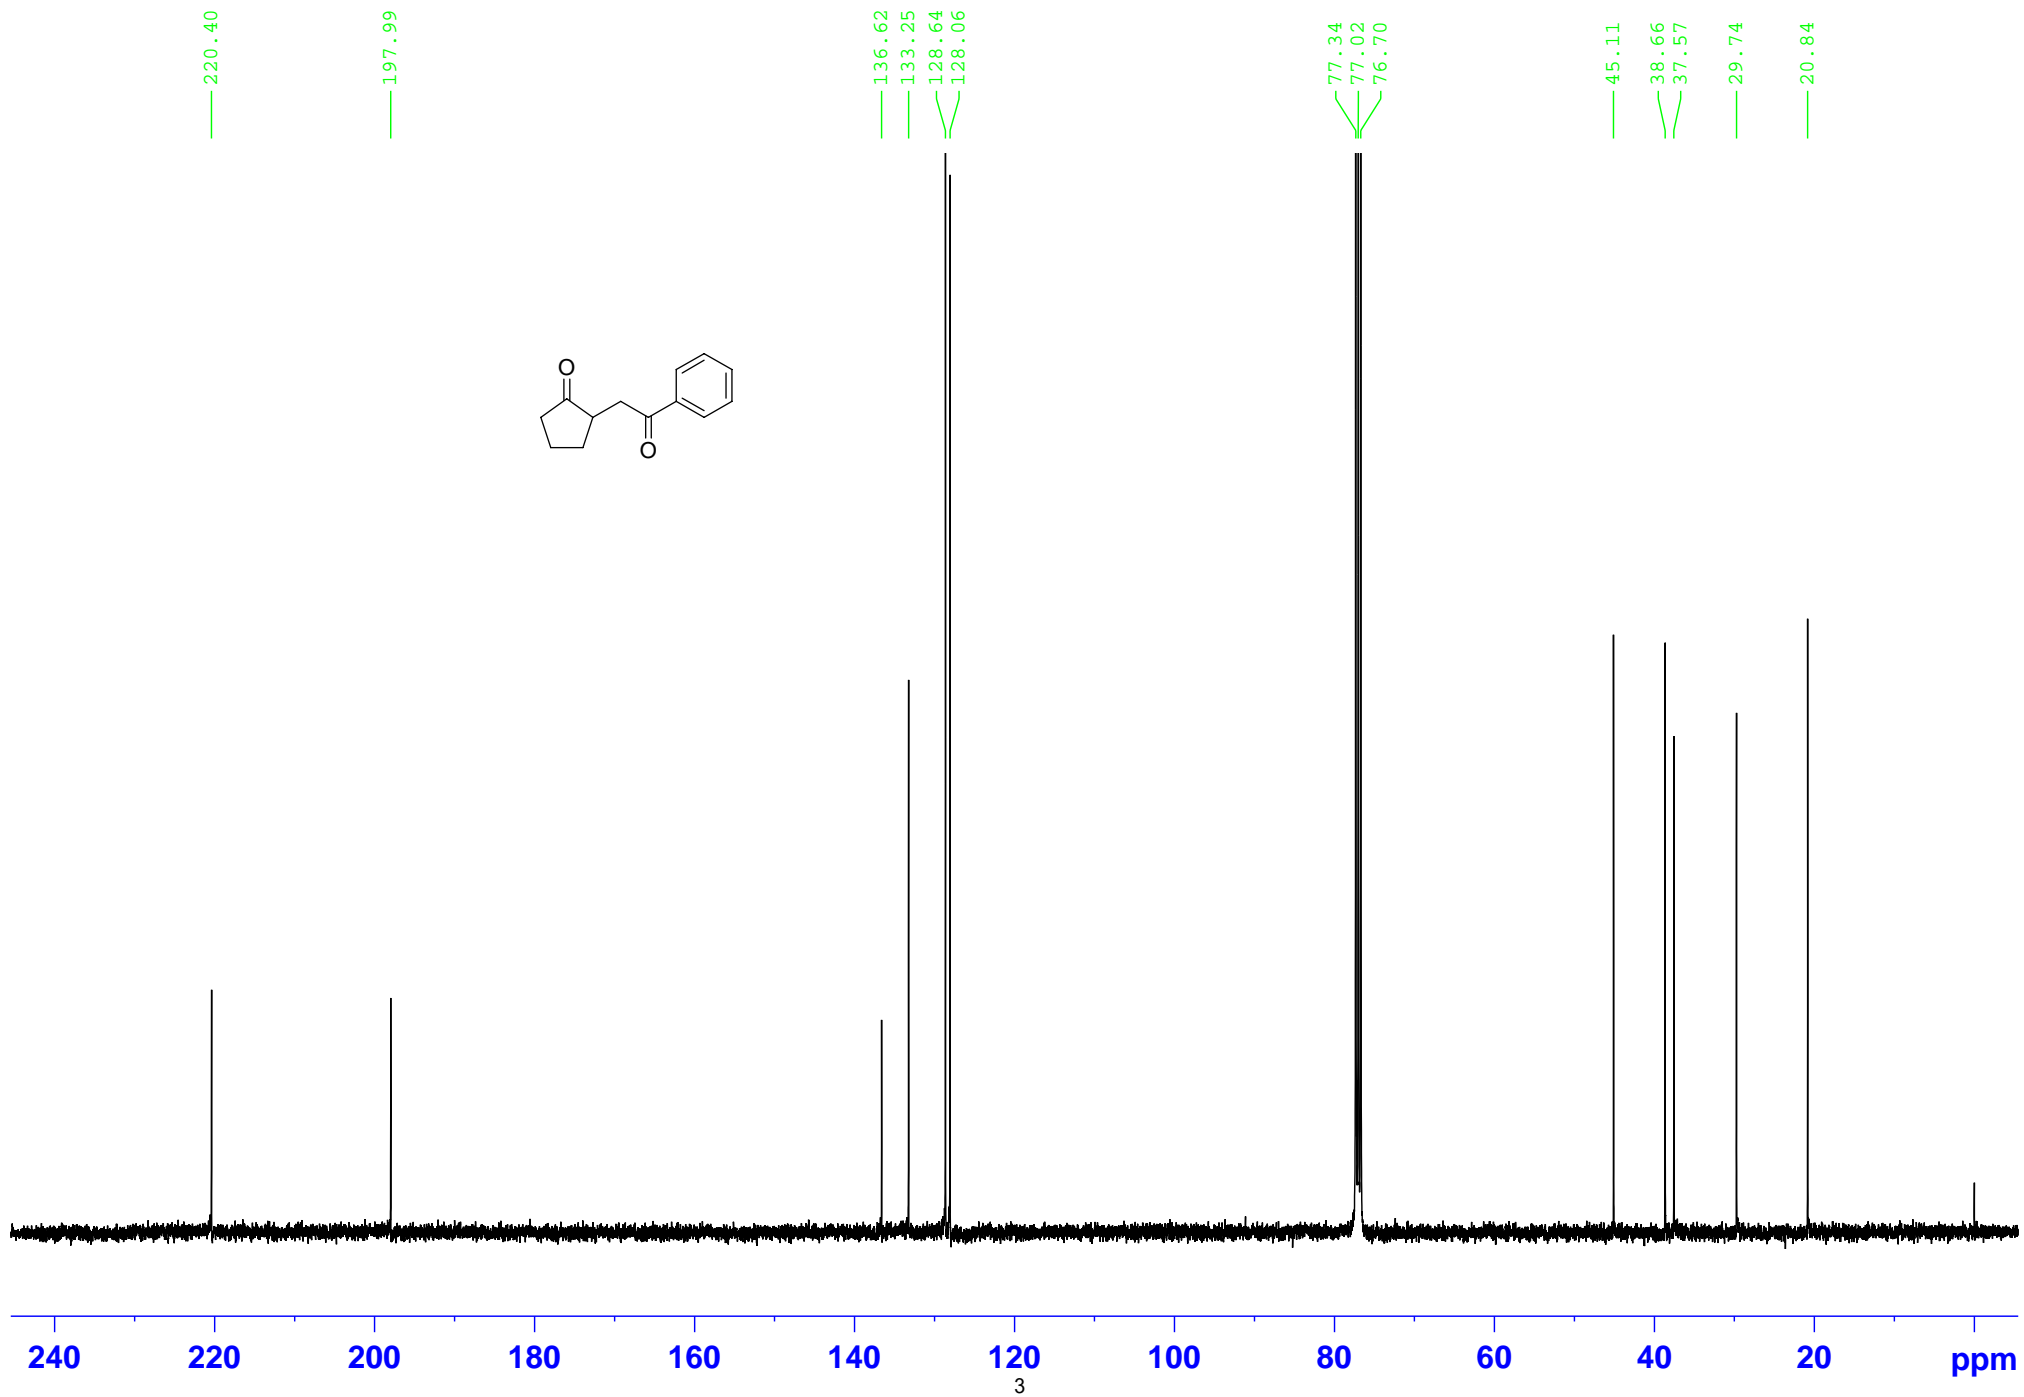

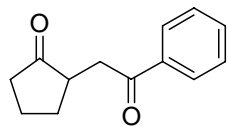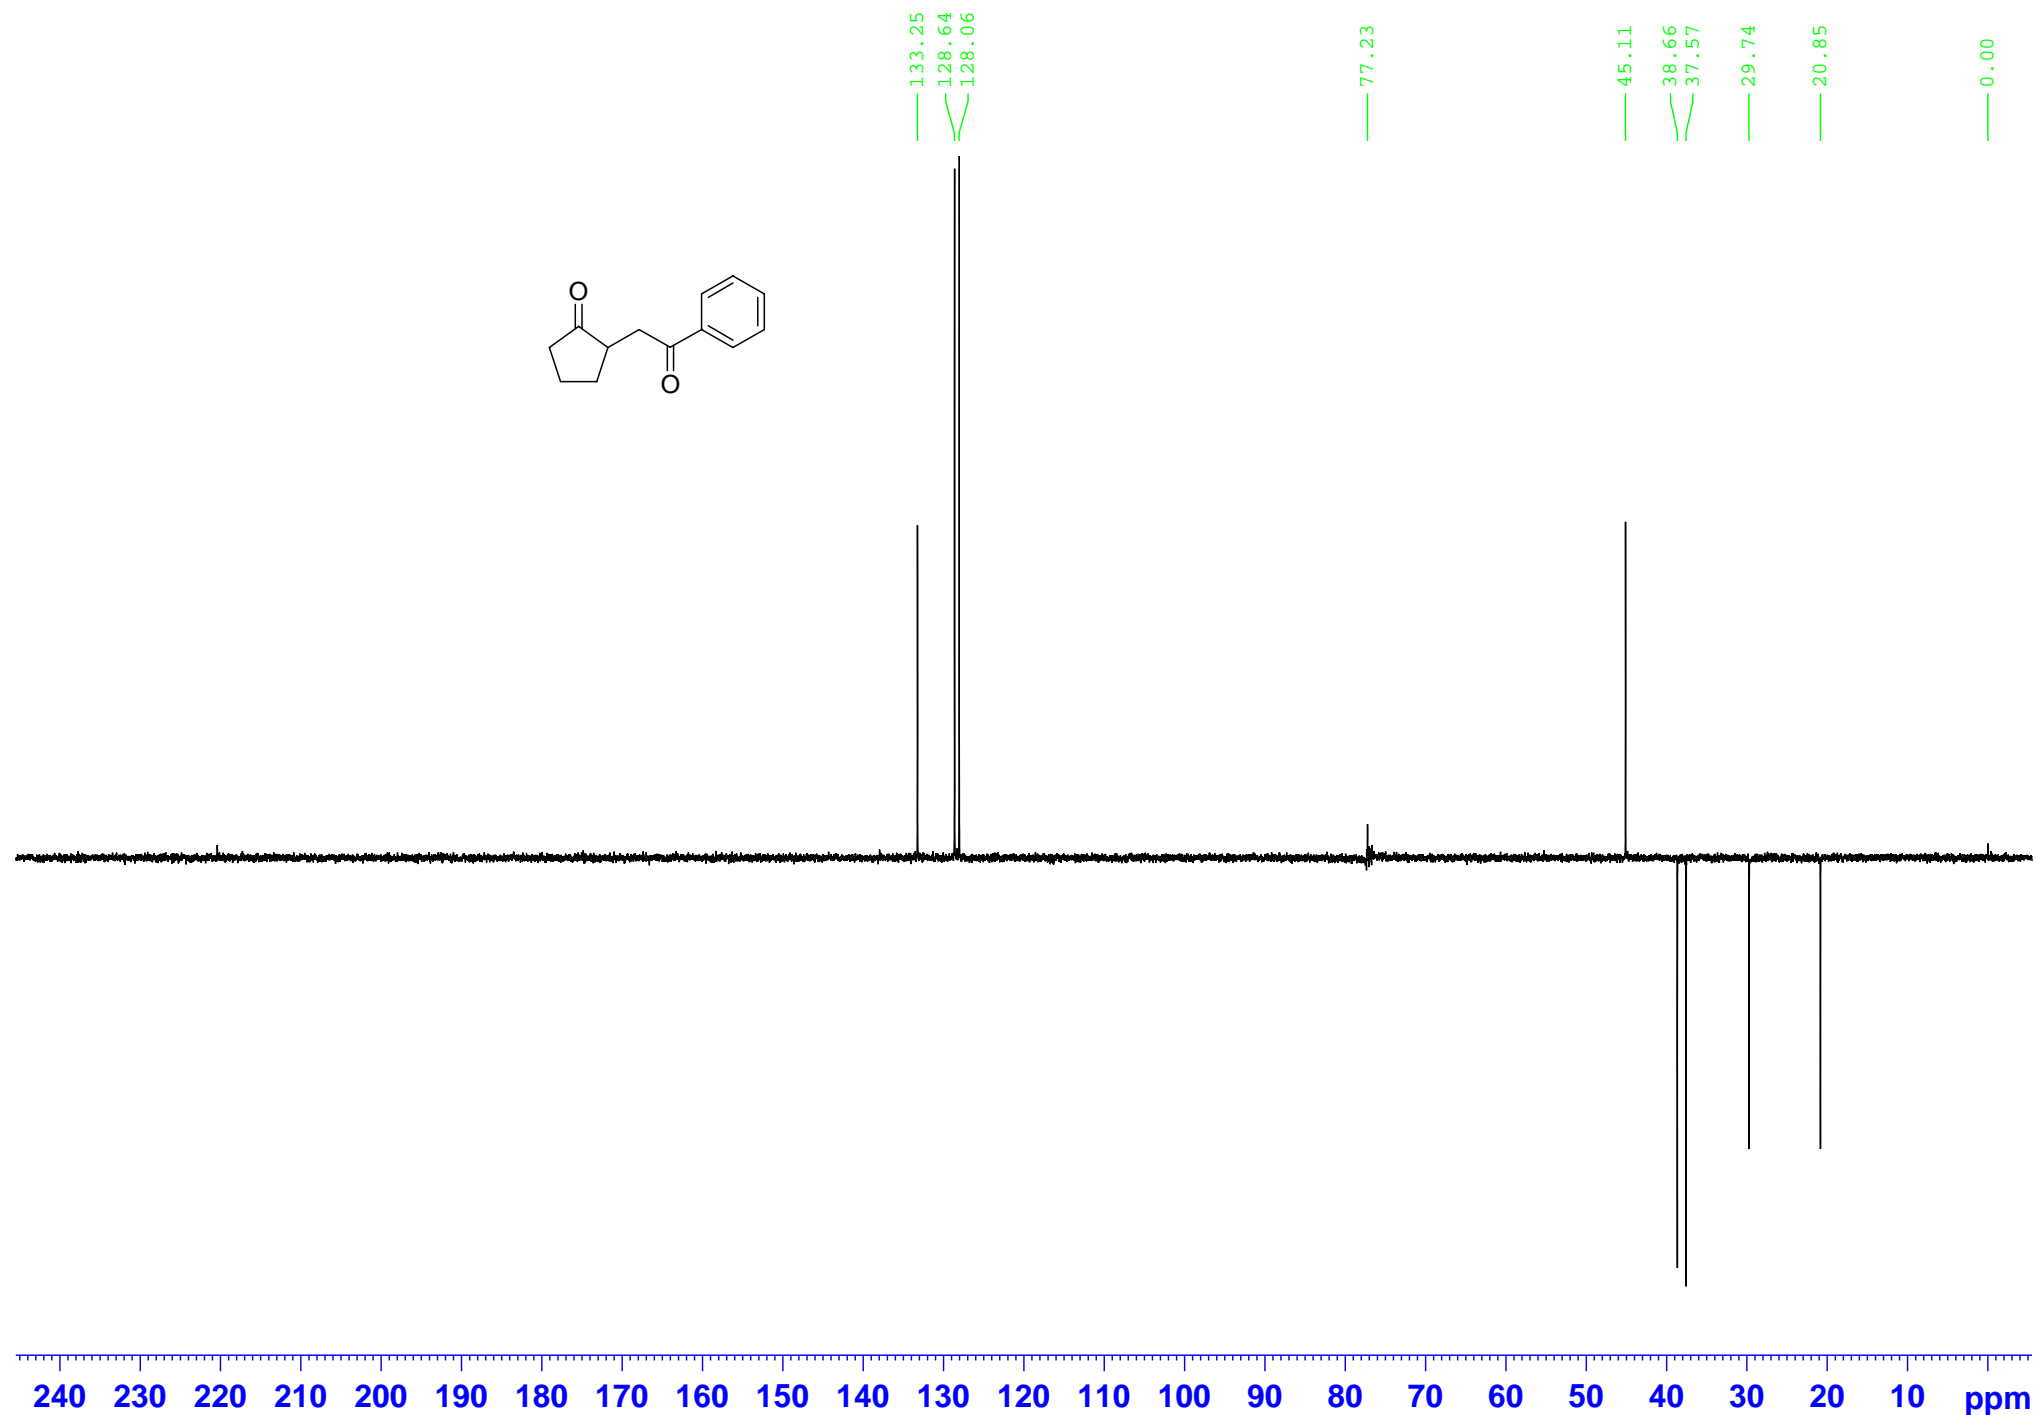

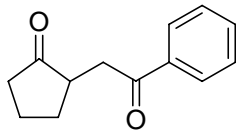

HMQC

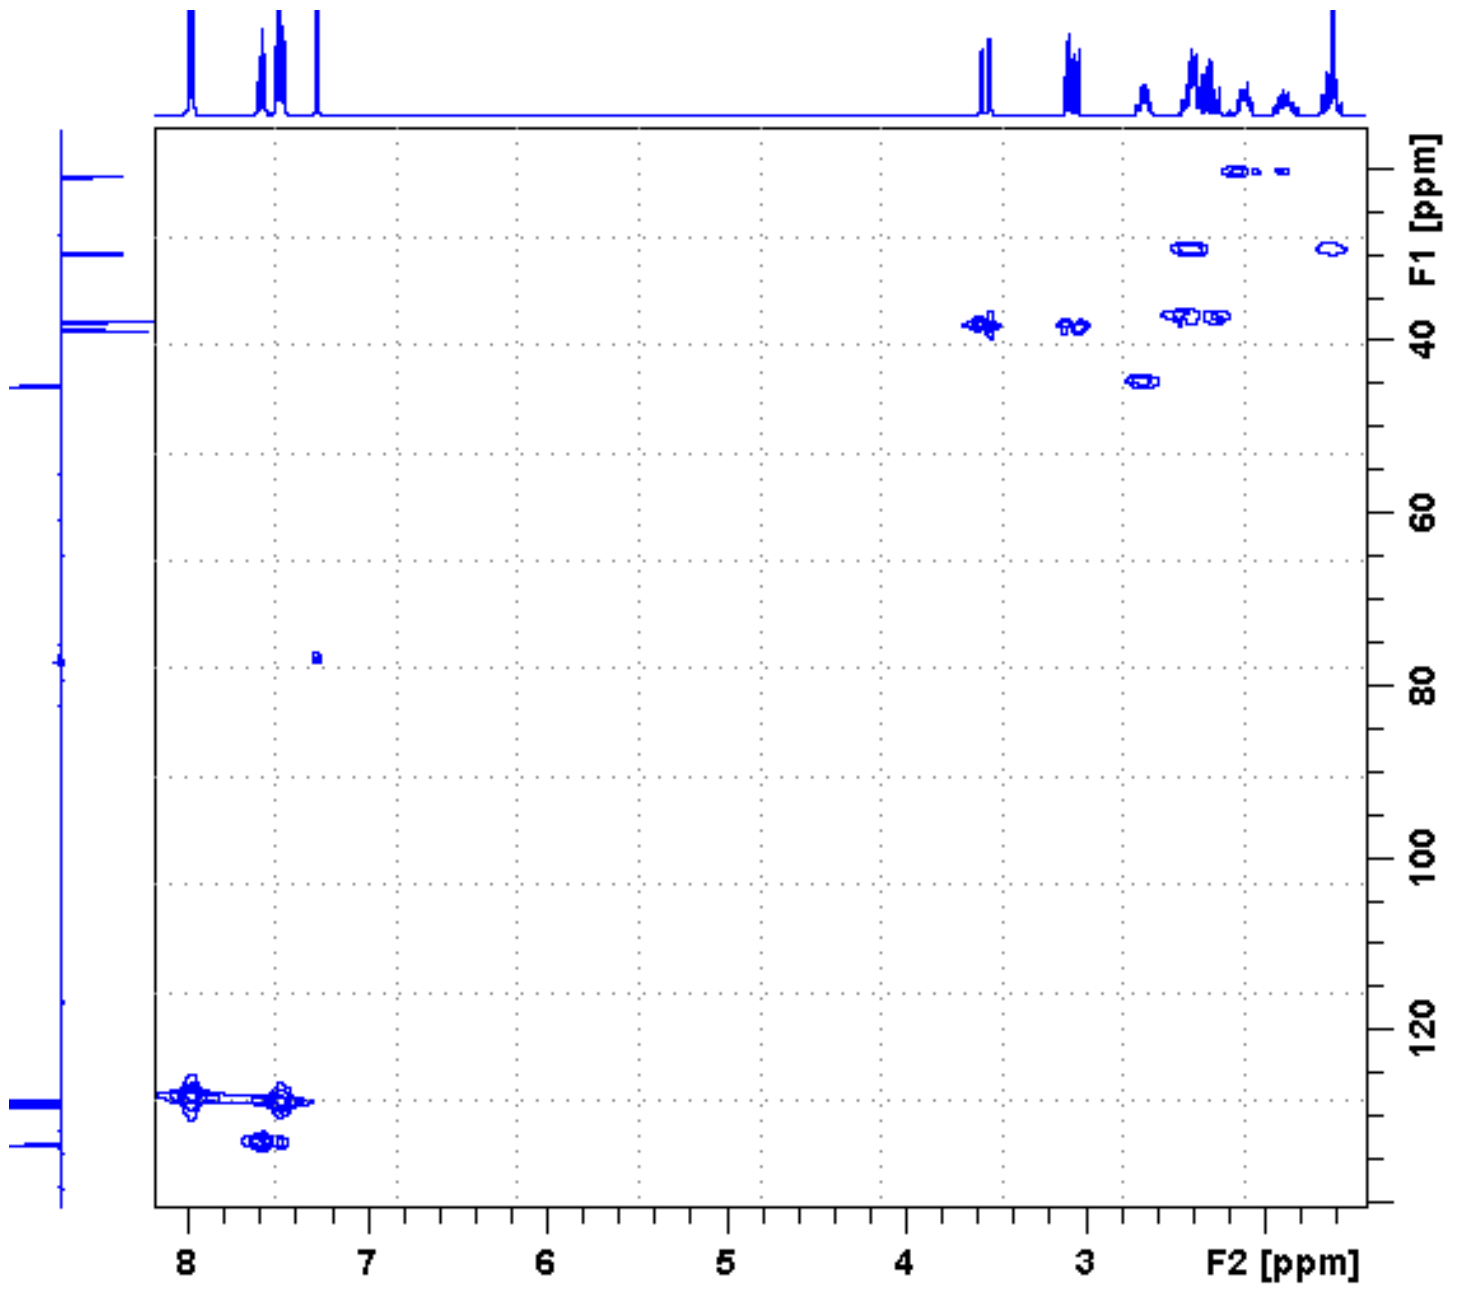

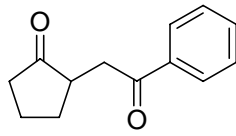

COSY

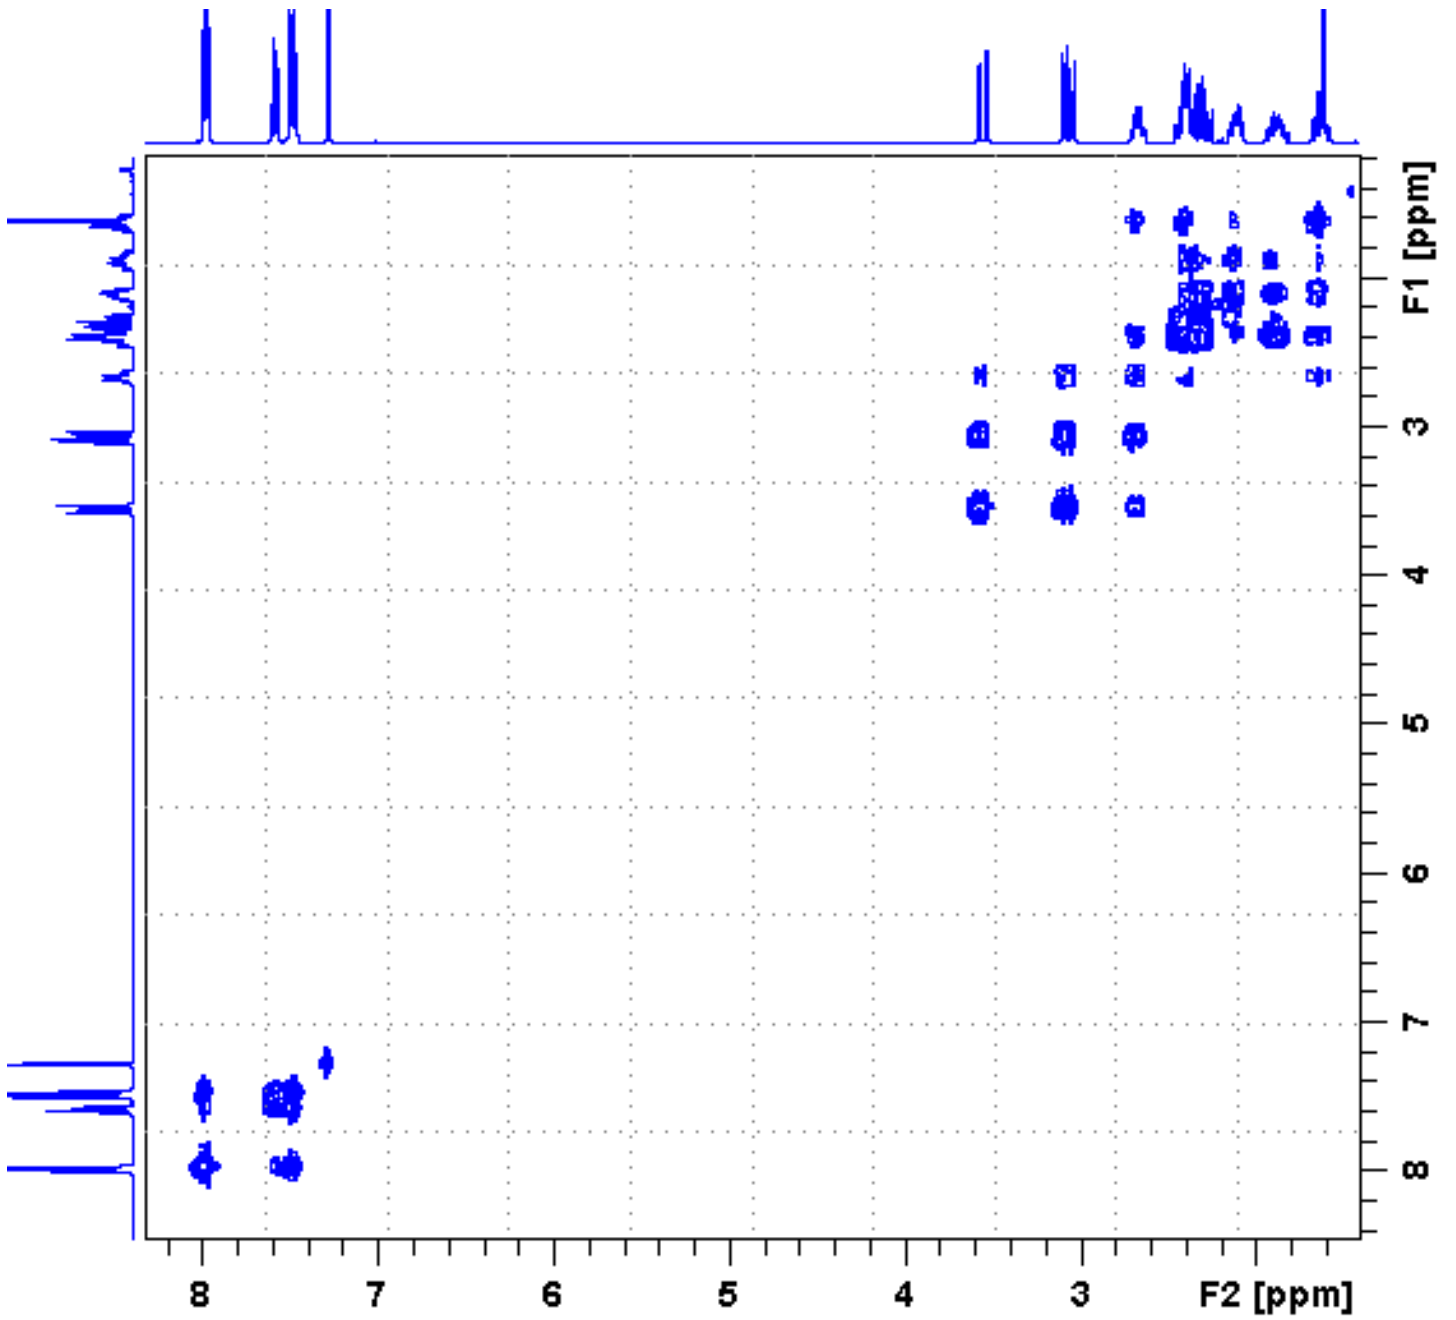

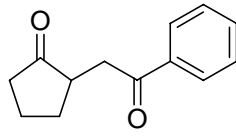

HMBC

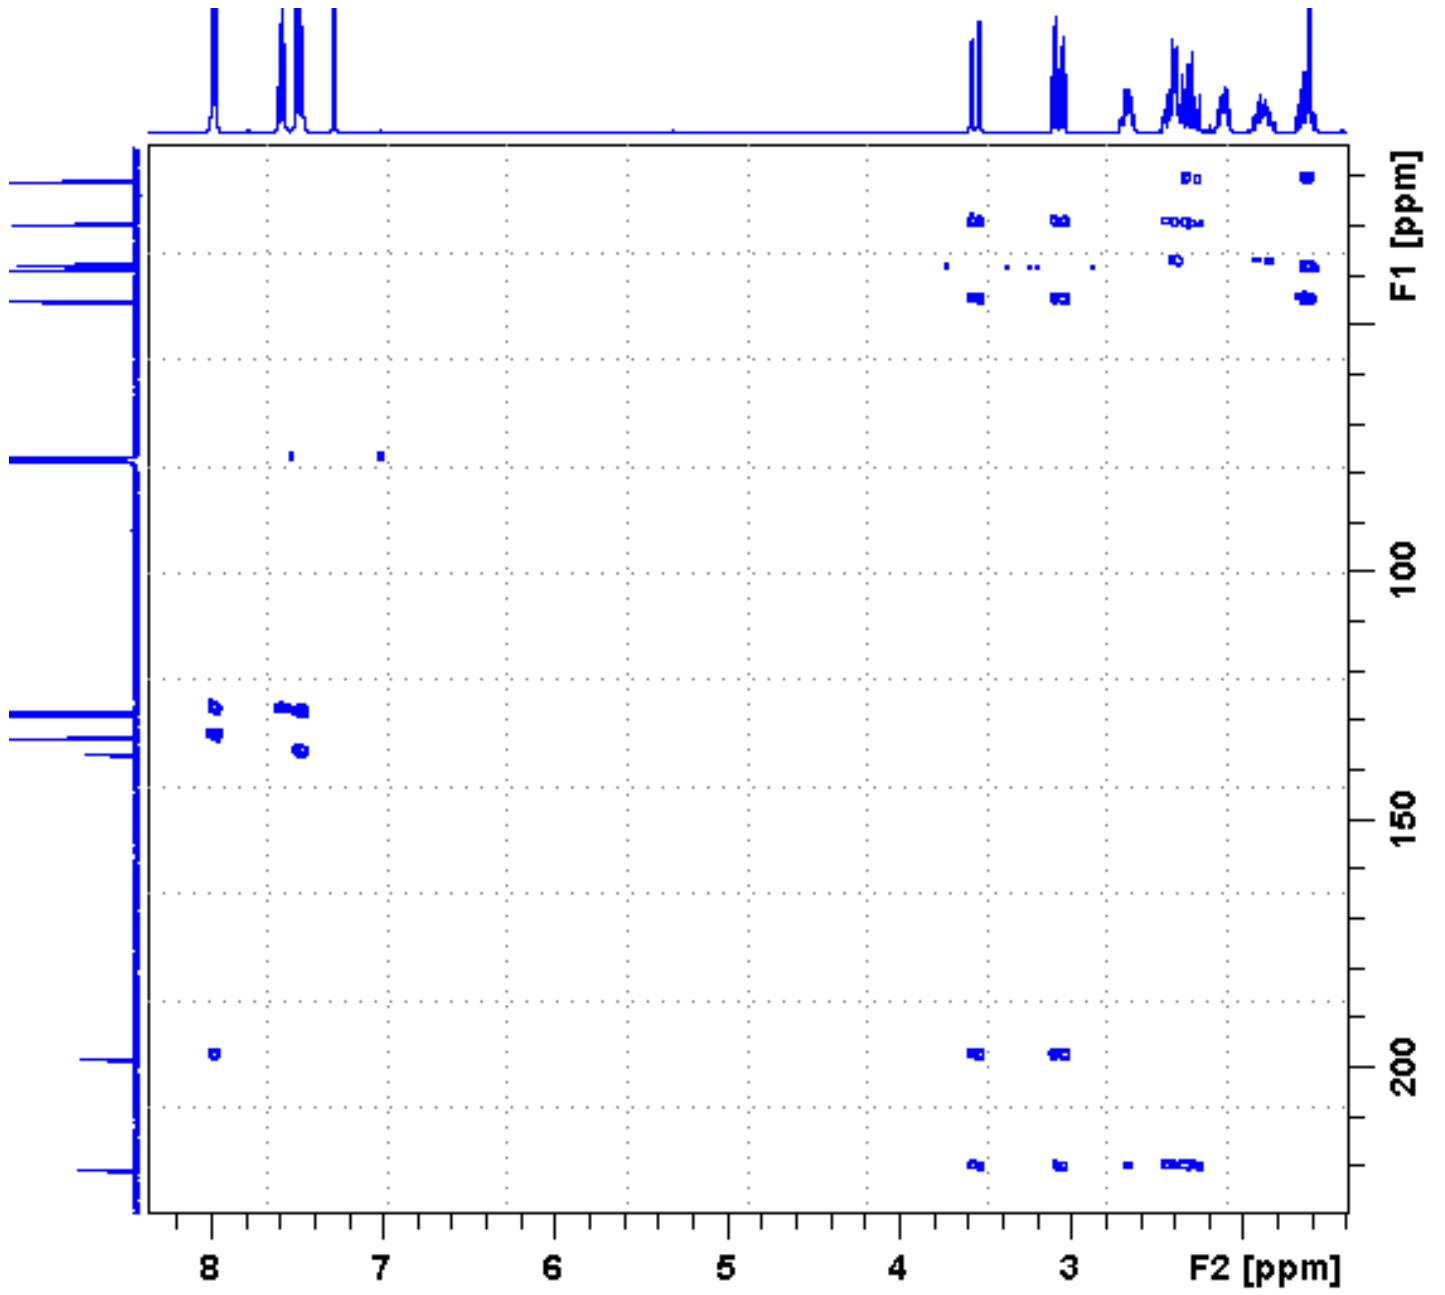

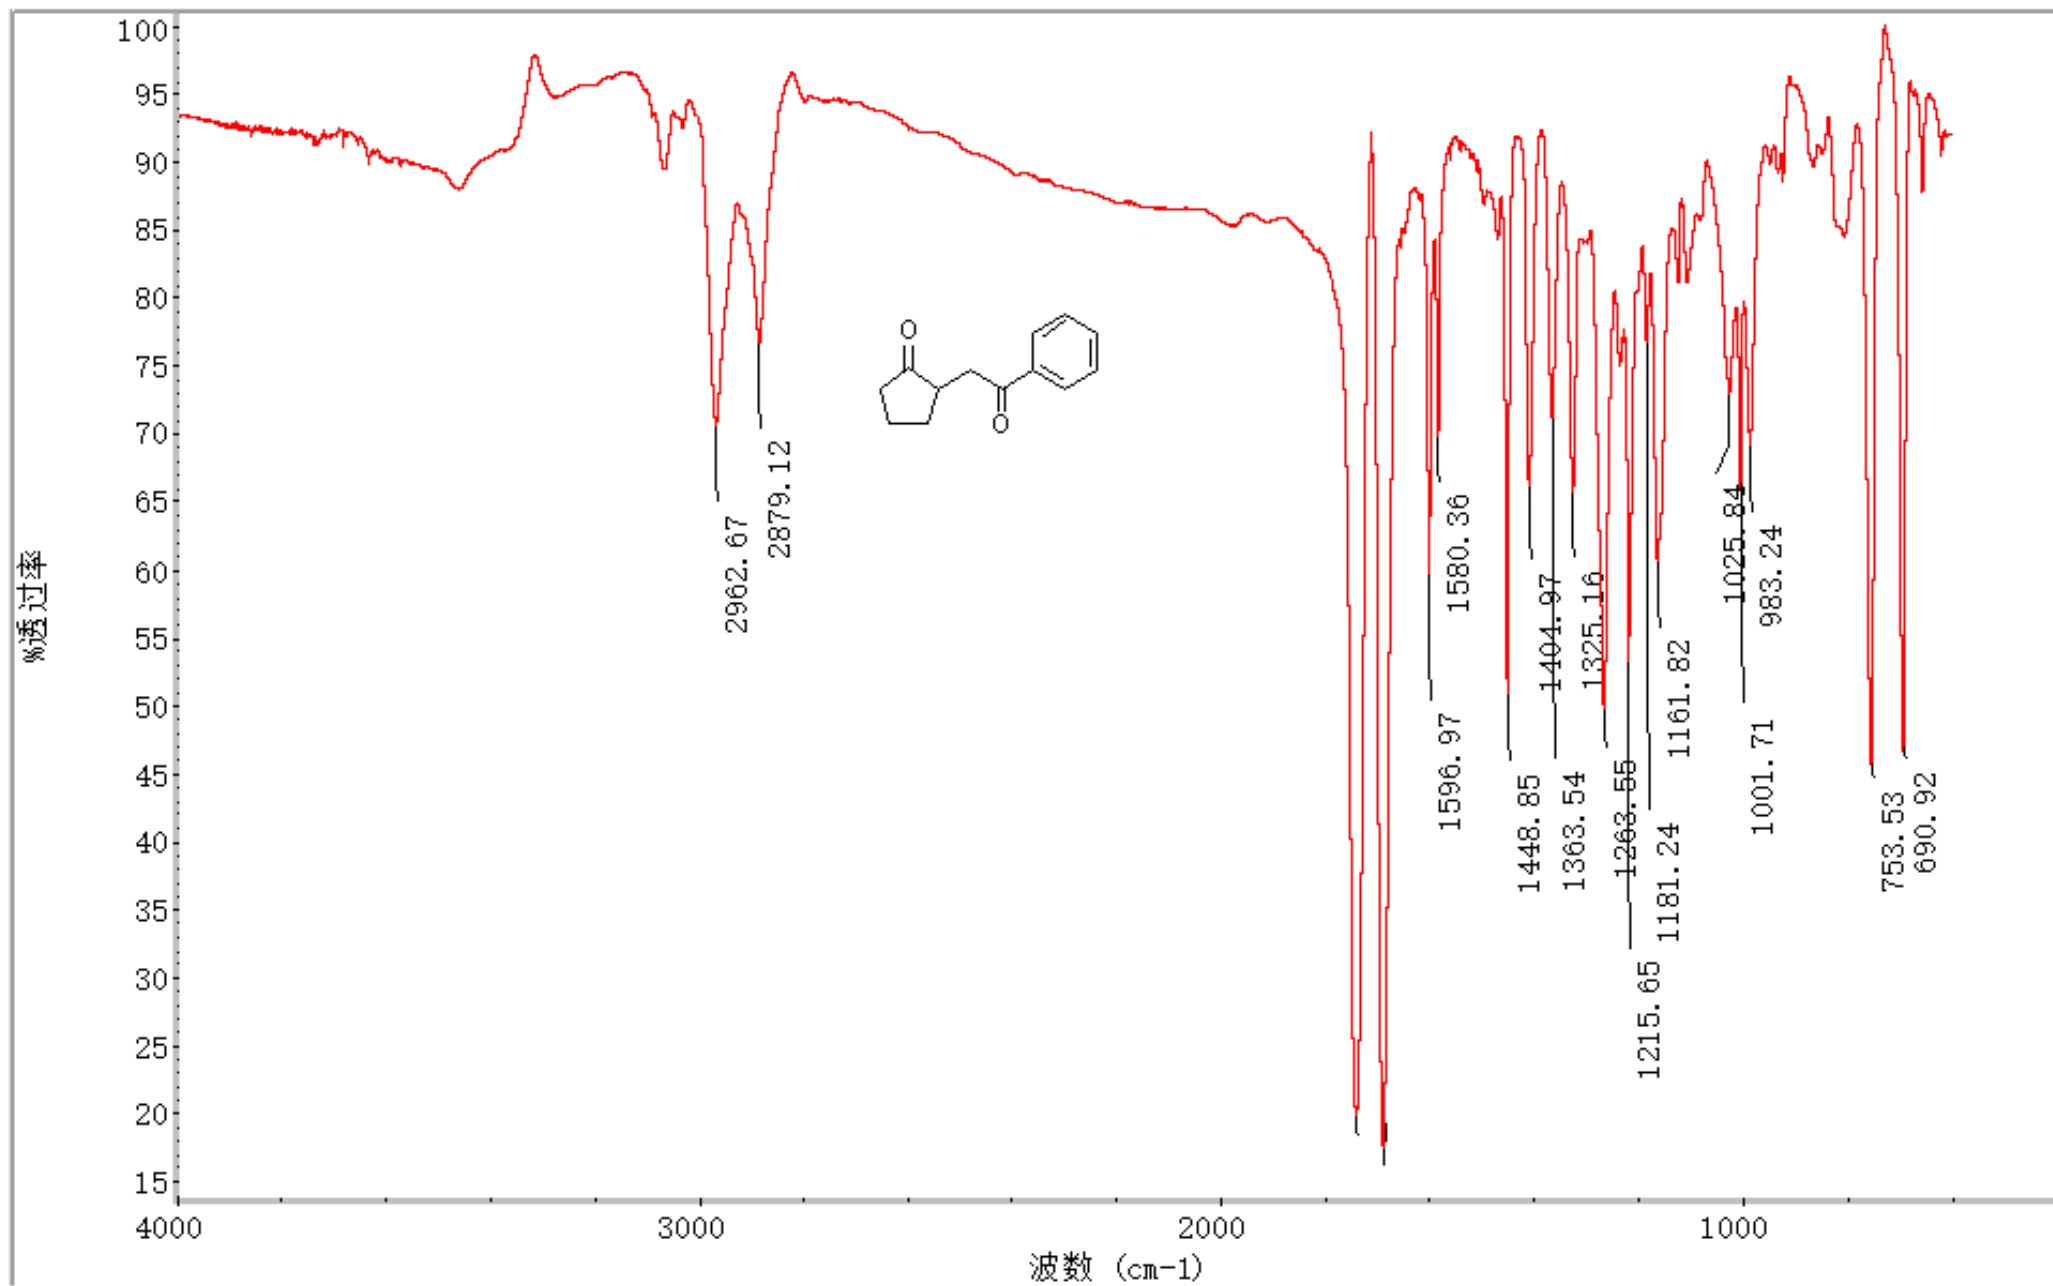



7.882  
7.871  
7.869  
7.703  
7.701  
7.699  
7.687  
7.685  
7.683  
7.363  
7.348  
7.332  
7.271

3.509  
3.502  
3.473  
3.466  
3.035  
3.019  
2.999  
2.983  
2.658  
2.640  
2.397  
2.389  
2.376  
2.373  
2.363  
2.360  
2.306  
2.288  
2.284  
2.266  
2.250  
2.228  
2.112  
2.099  
2.086  
2.082  
1.880  
1.670  
1.615  
1.601  
1.591  
1.577

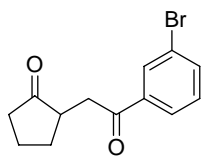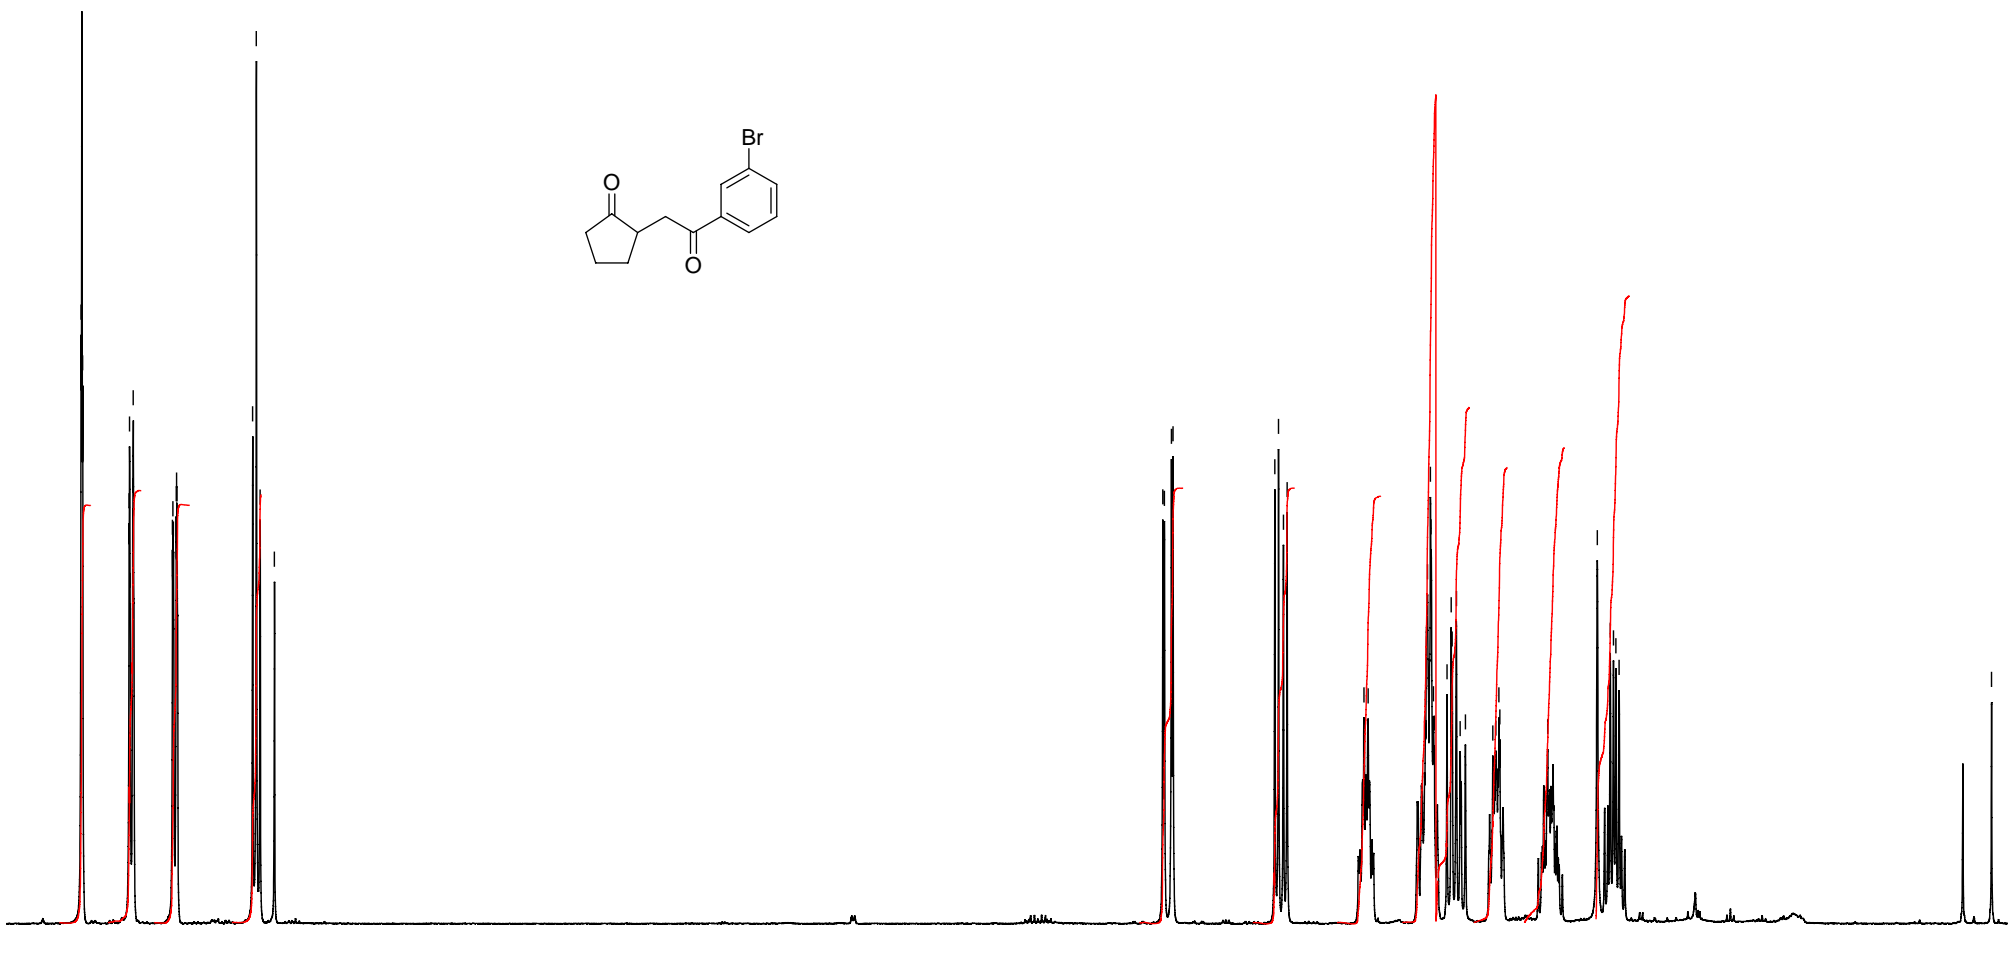

1.00  
1.03  
1.00  
1.02

1.04  
1.04  
1.02  
2.08  
1.23  
1.09  
1.13  
1.50

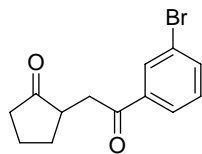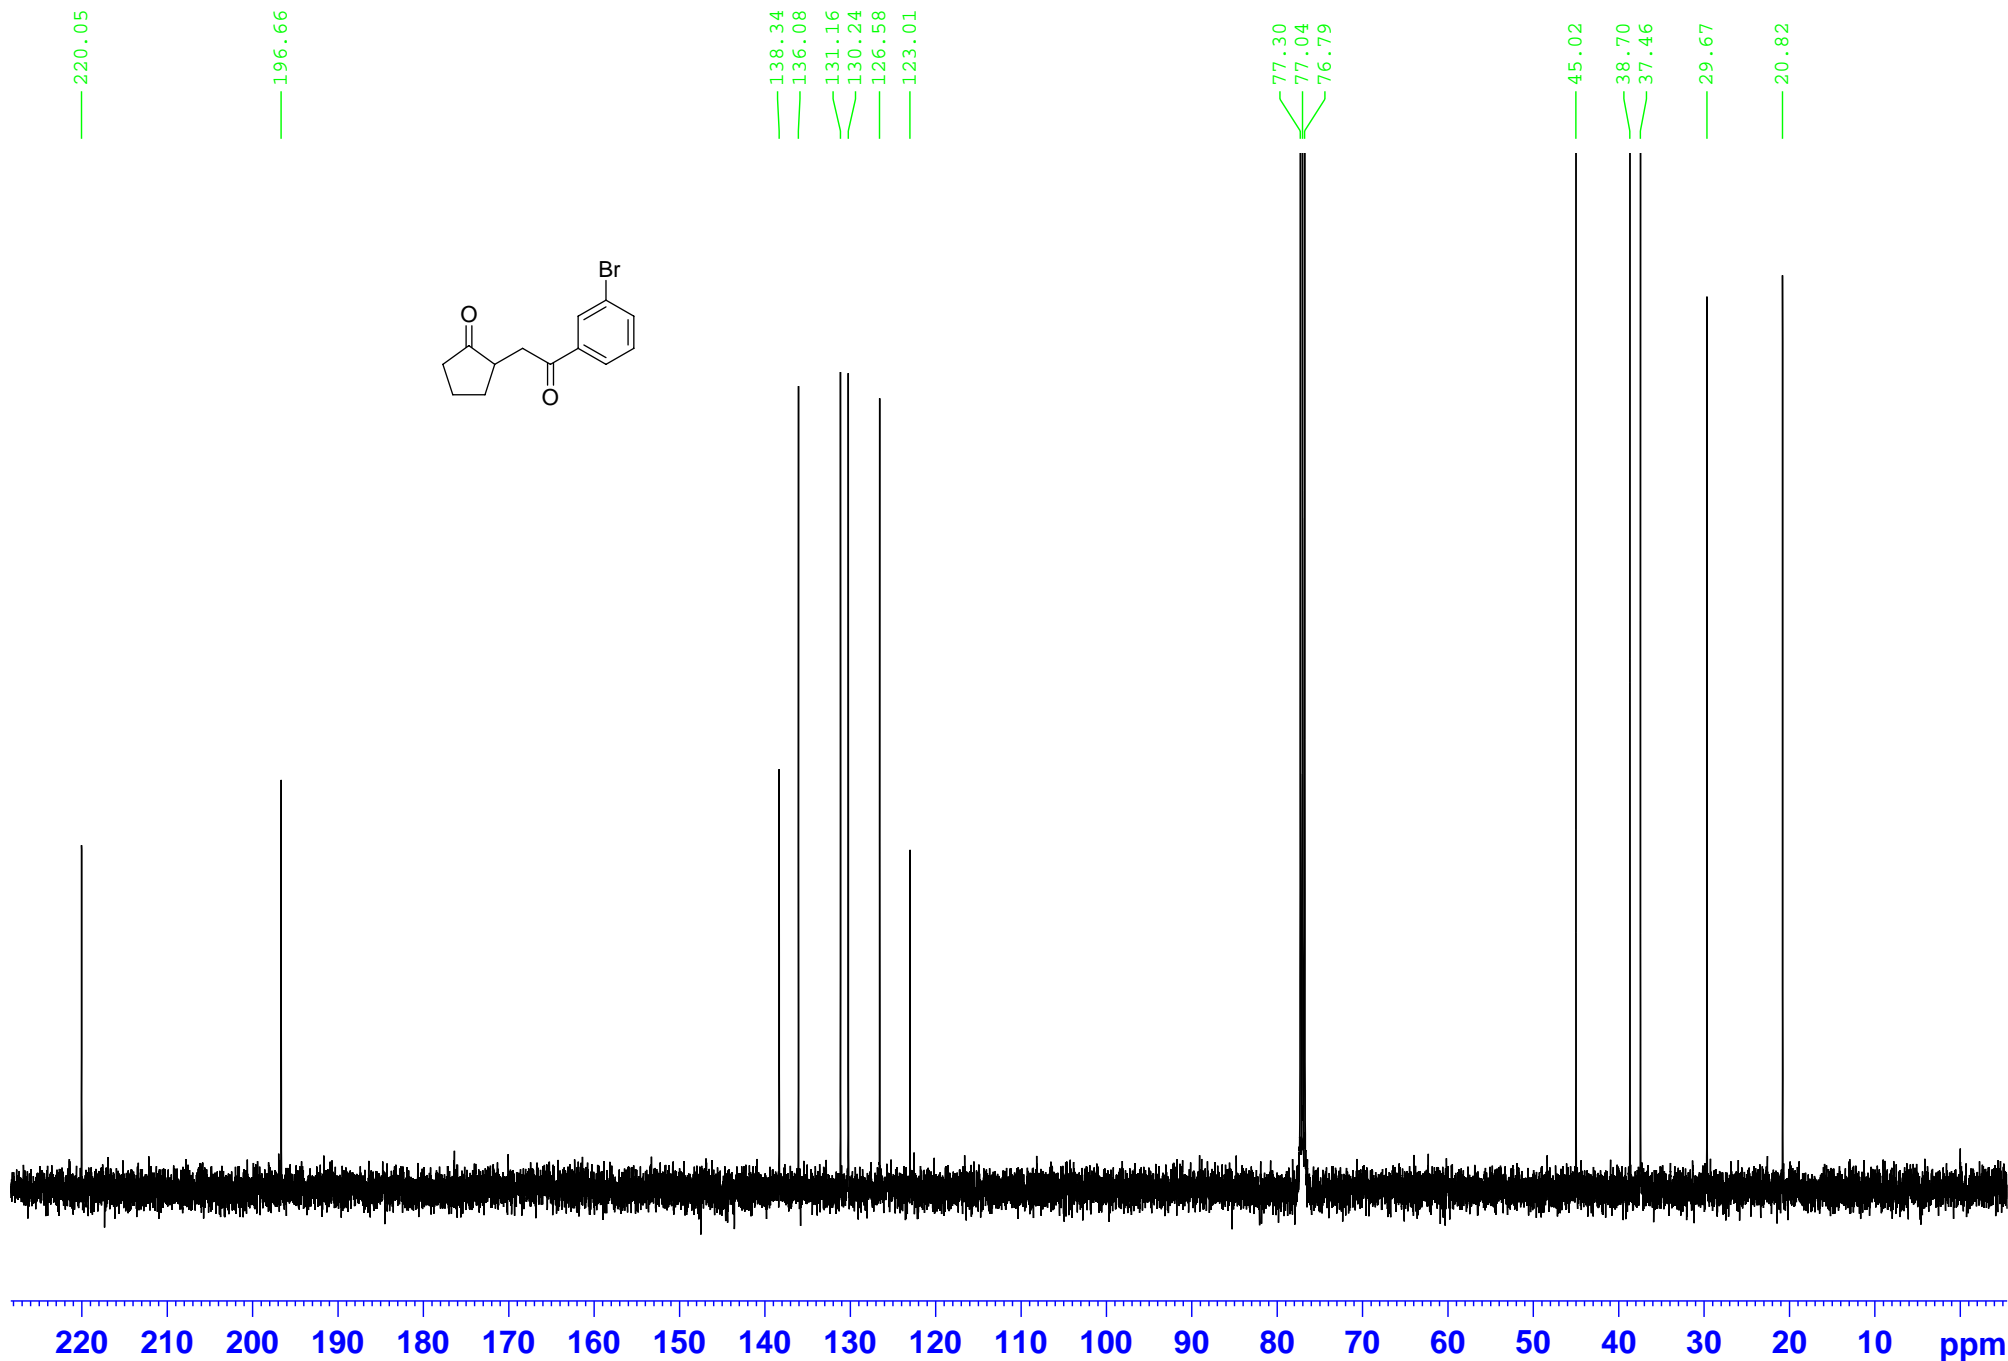

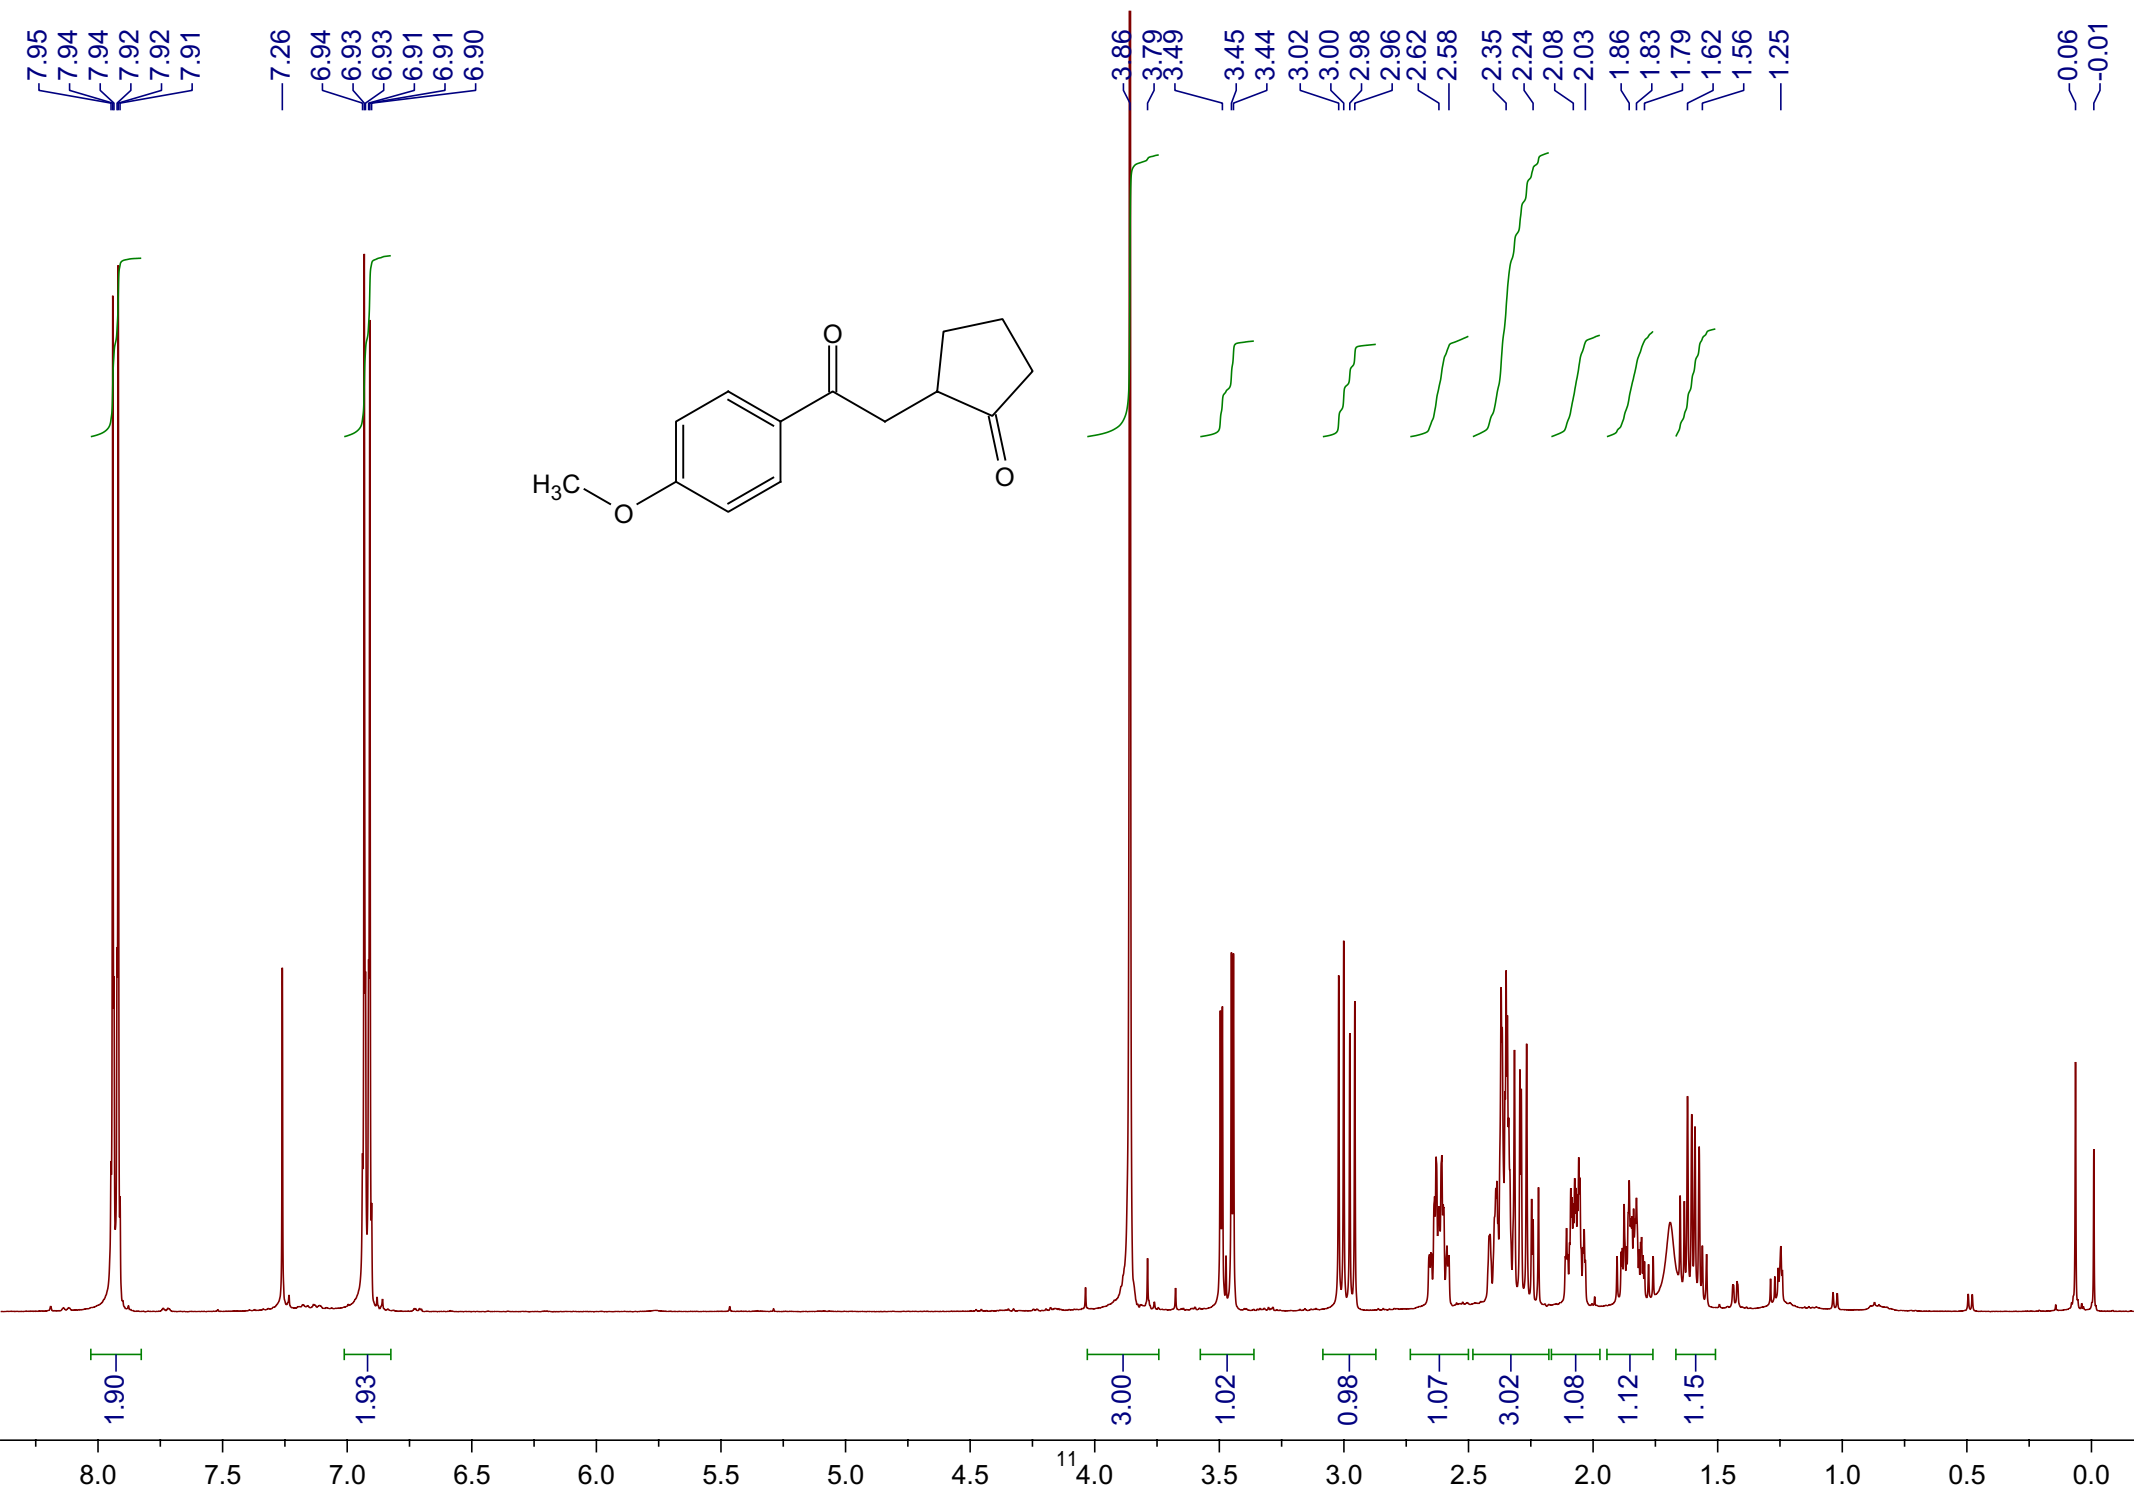

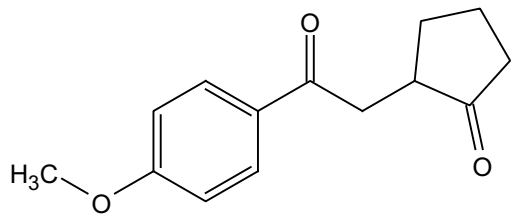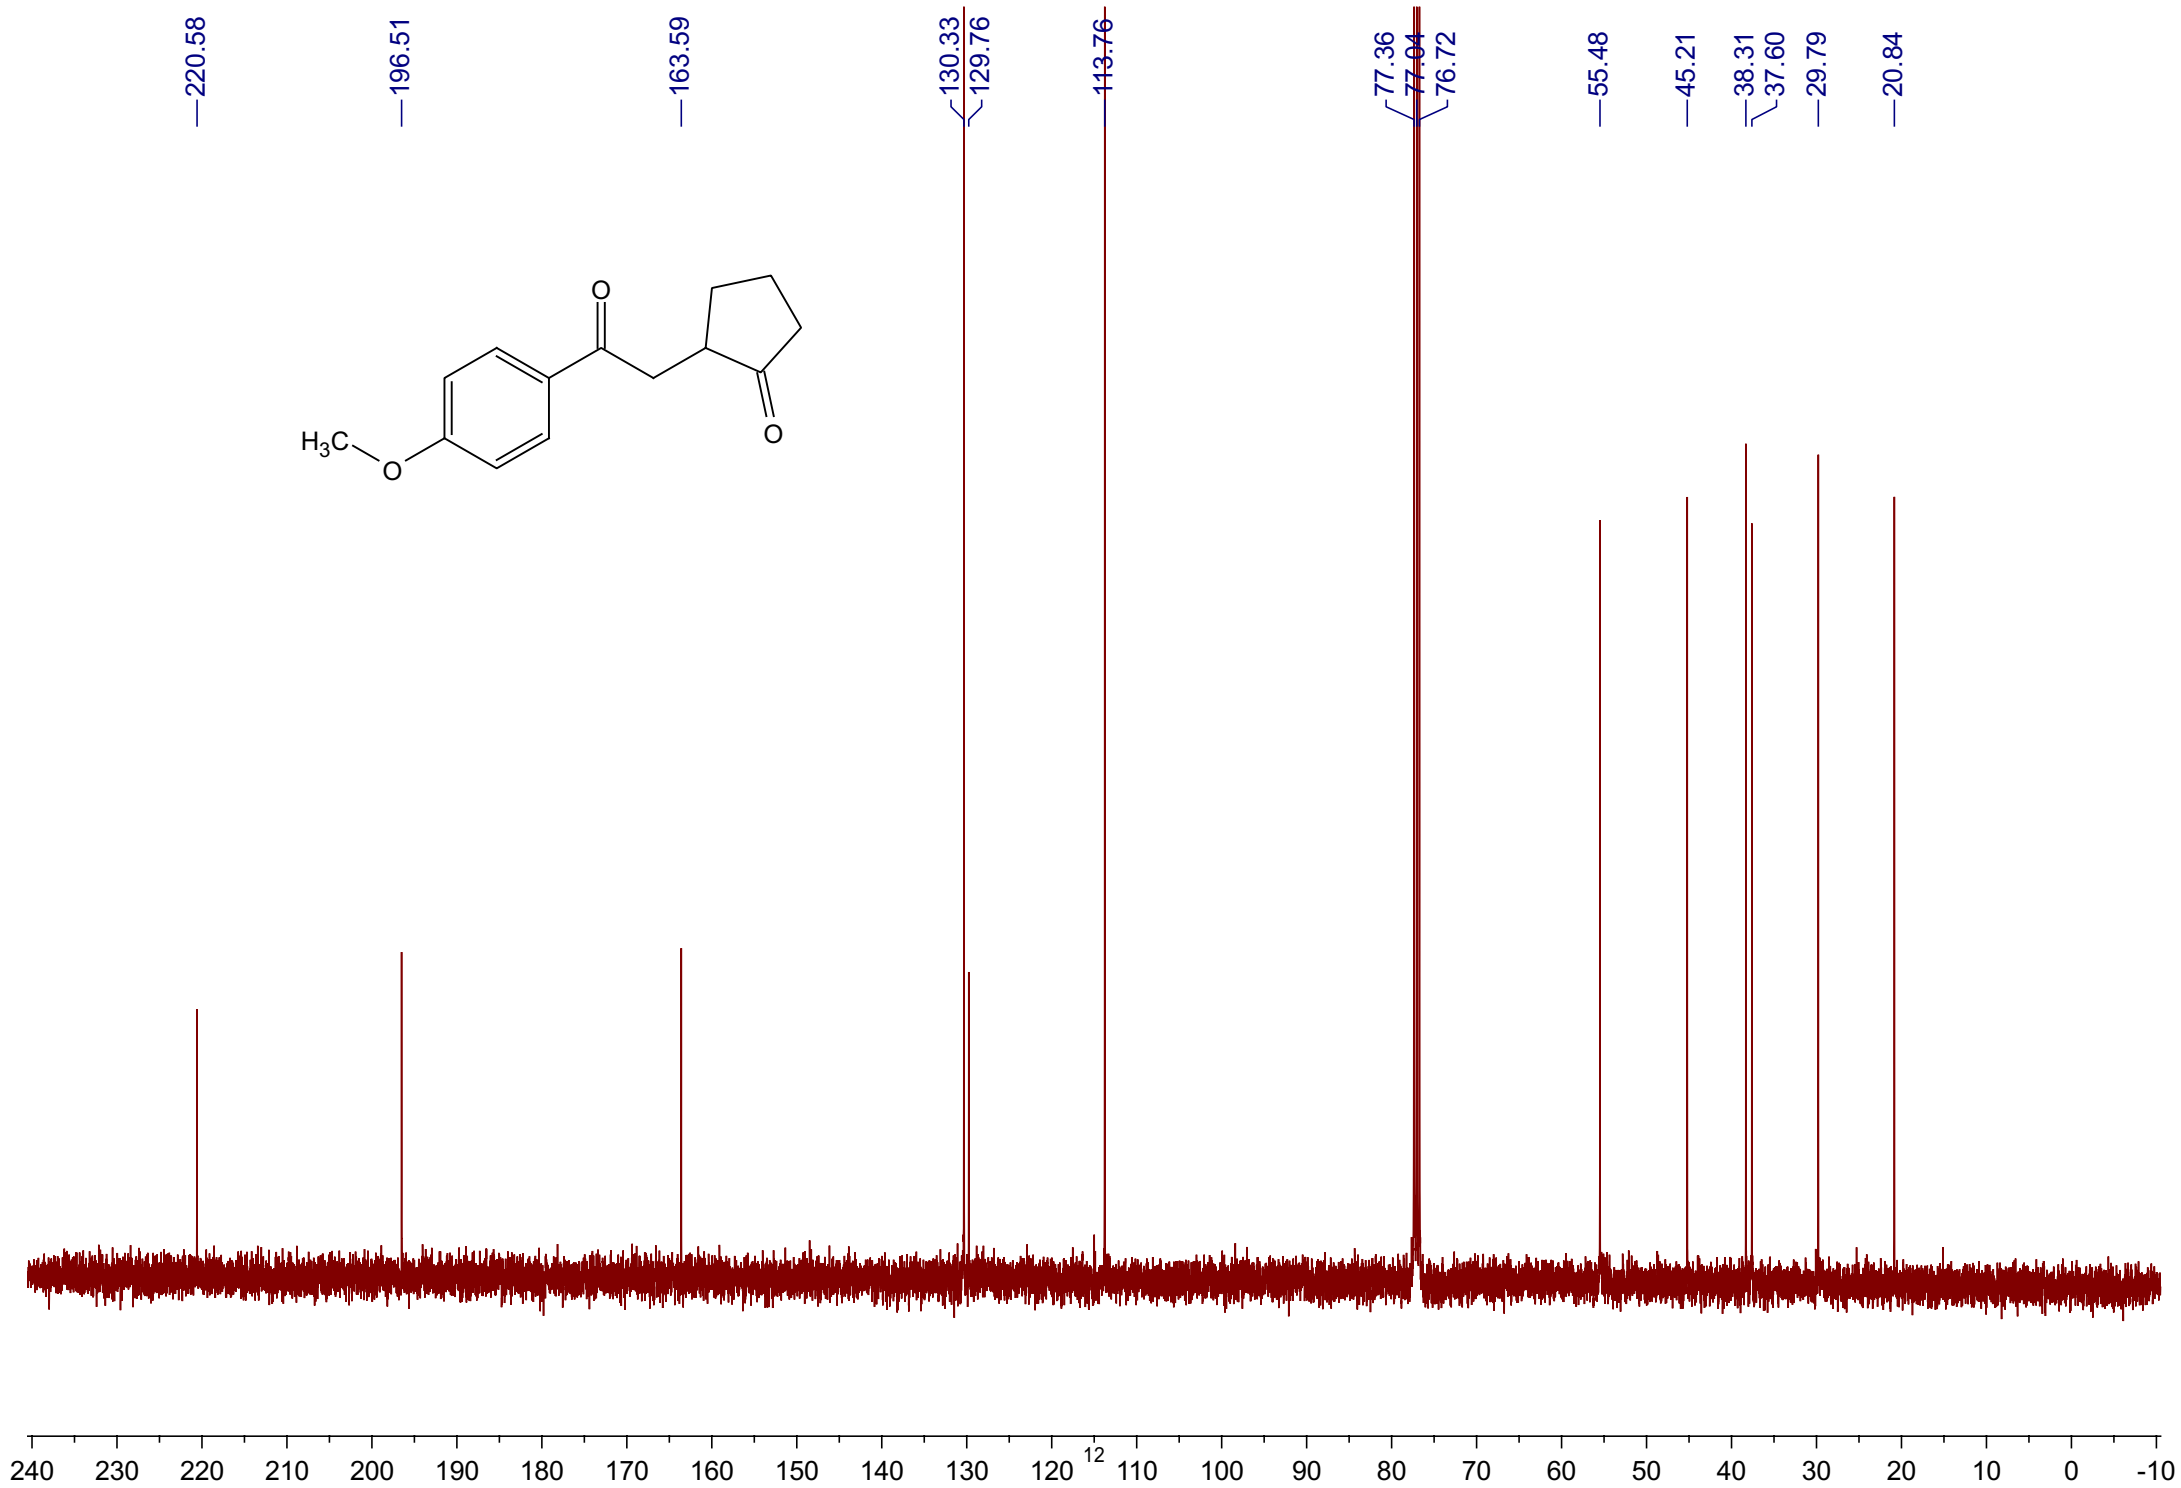

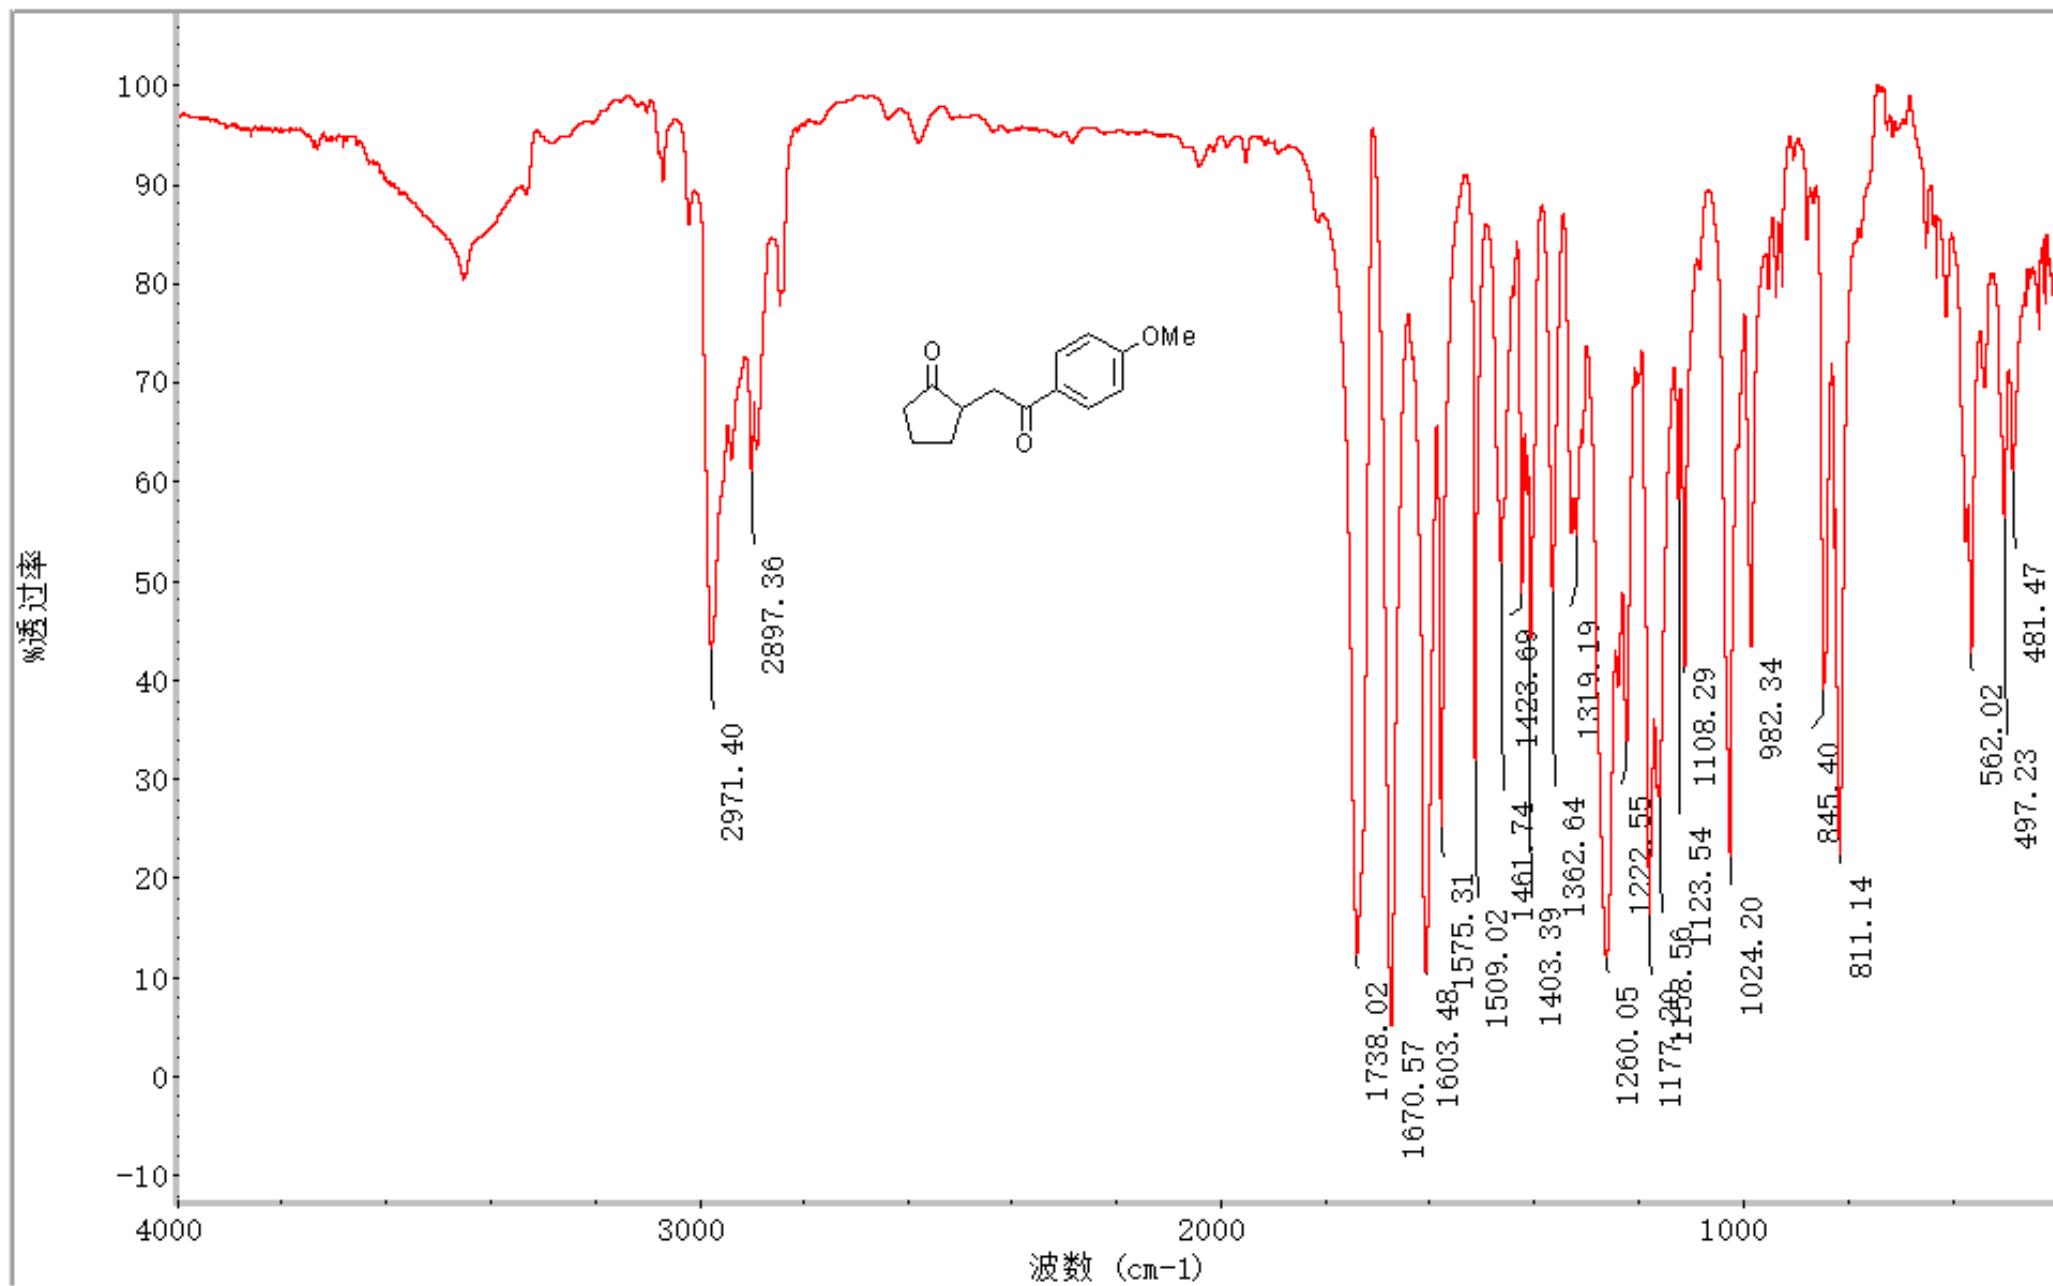

8.601  
8.584  
8.002  
7.986  
7.910  
7.895  
7.889  
7.872  
7.597  
7.539  
7.515  
7.500  
7.266

3.614  
3.607  
3.579  
3.571  
3.149  
3.133  
3.113  
3.098  
2.737  
2.729  
2.721  
2.713  
2.447  
2.444  
2.431  
2.428  
2.421  
2.416  
2.407  
2.391  
2.337  
2.319  
2.315  
2.297  
2.281  
2.259  
2.131  
2.127  
2.123  
2.119  
2.115  
2.109  
2.105  
2.102  
1.897  
1.893  
1.872

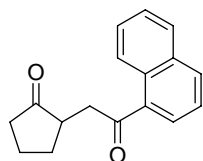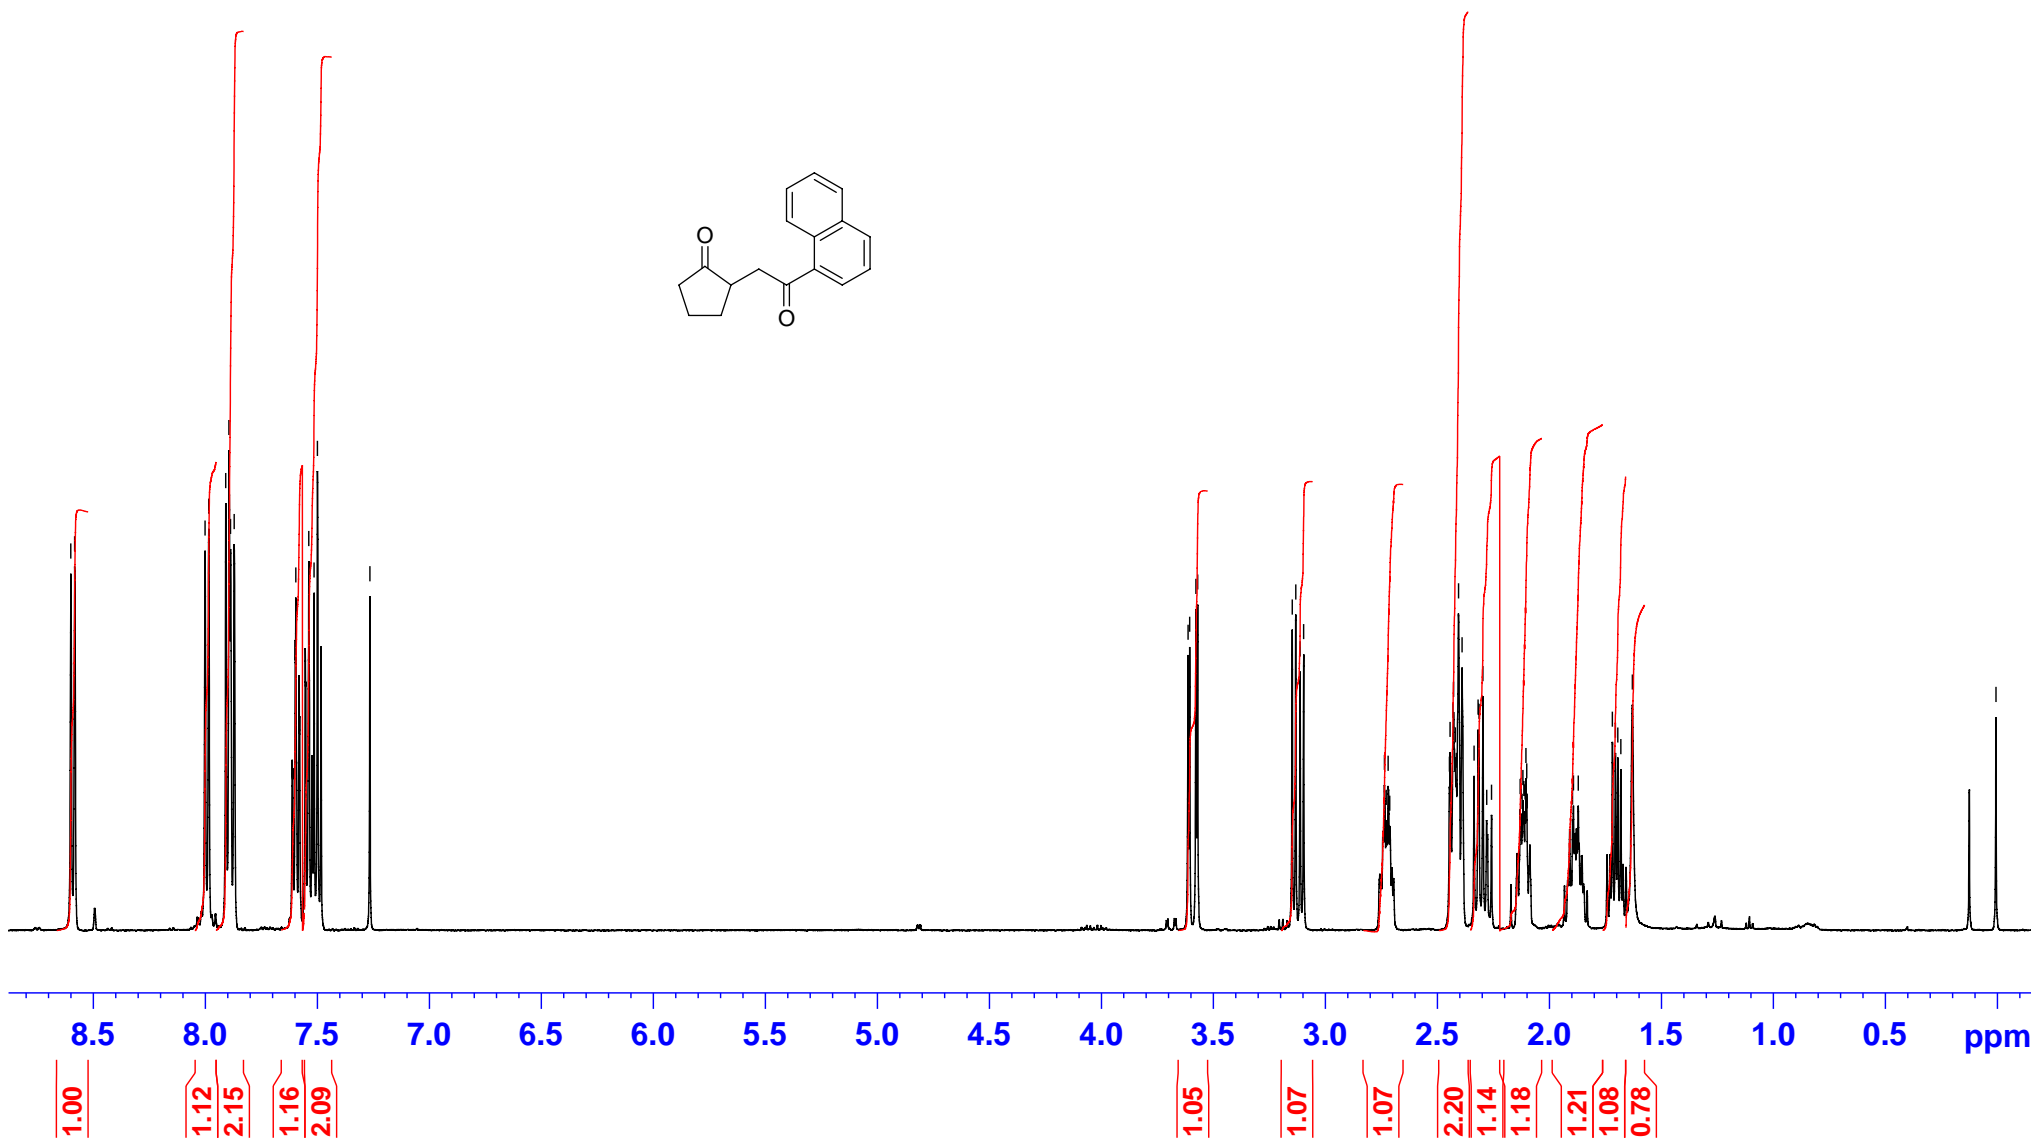

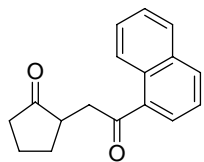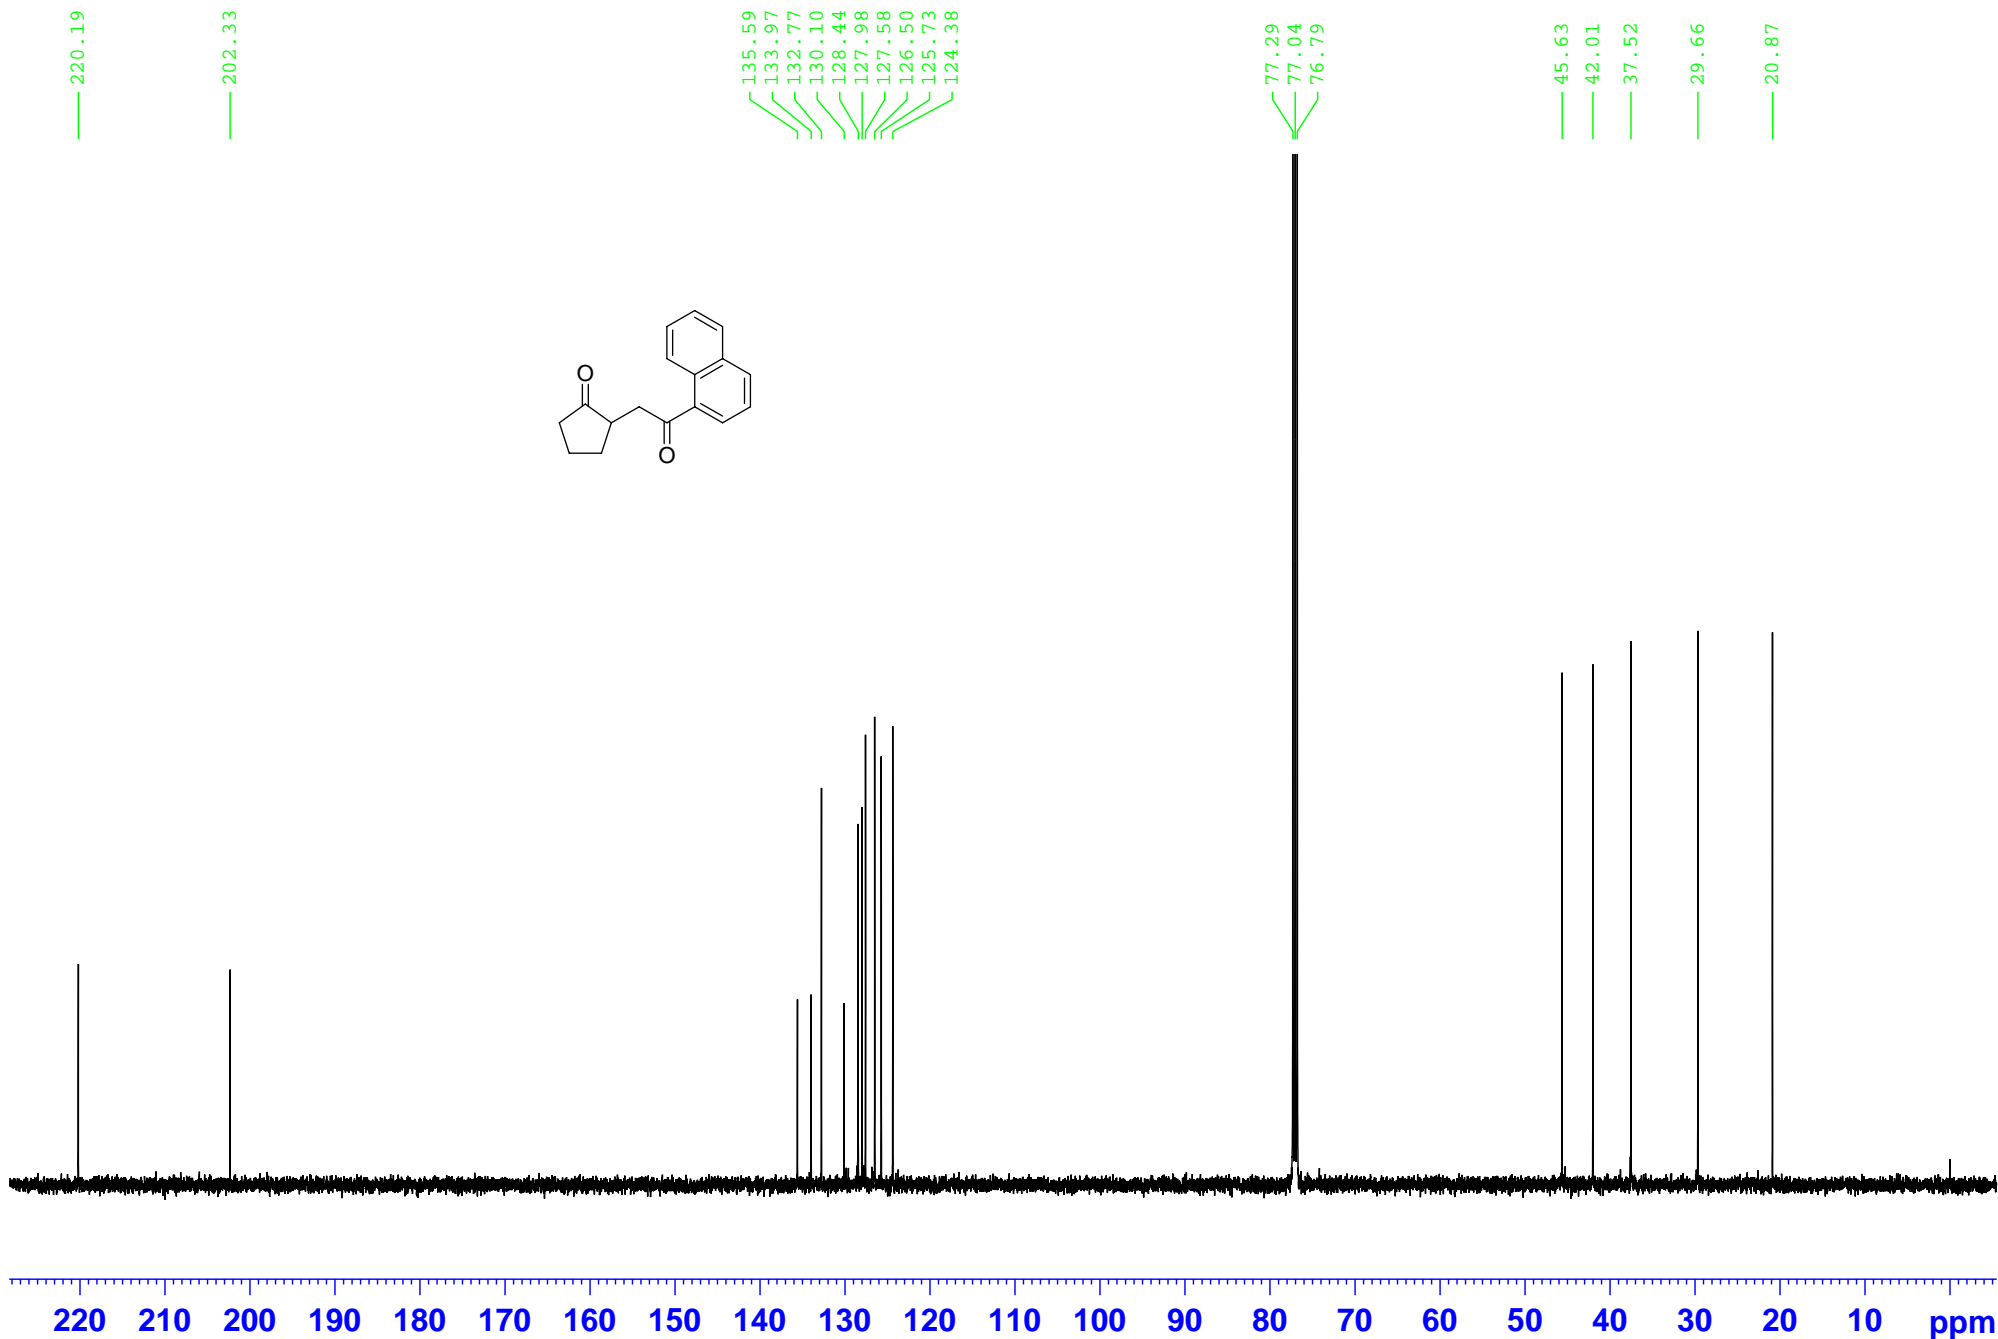

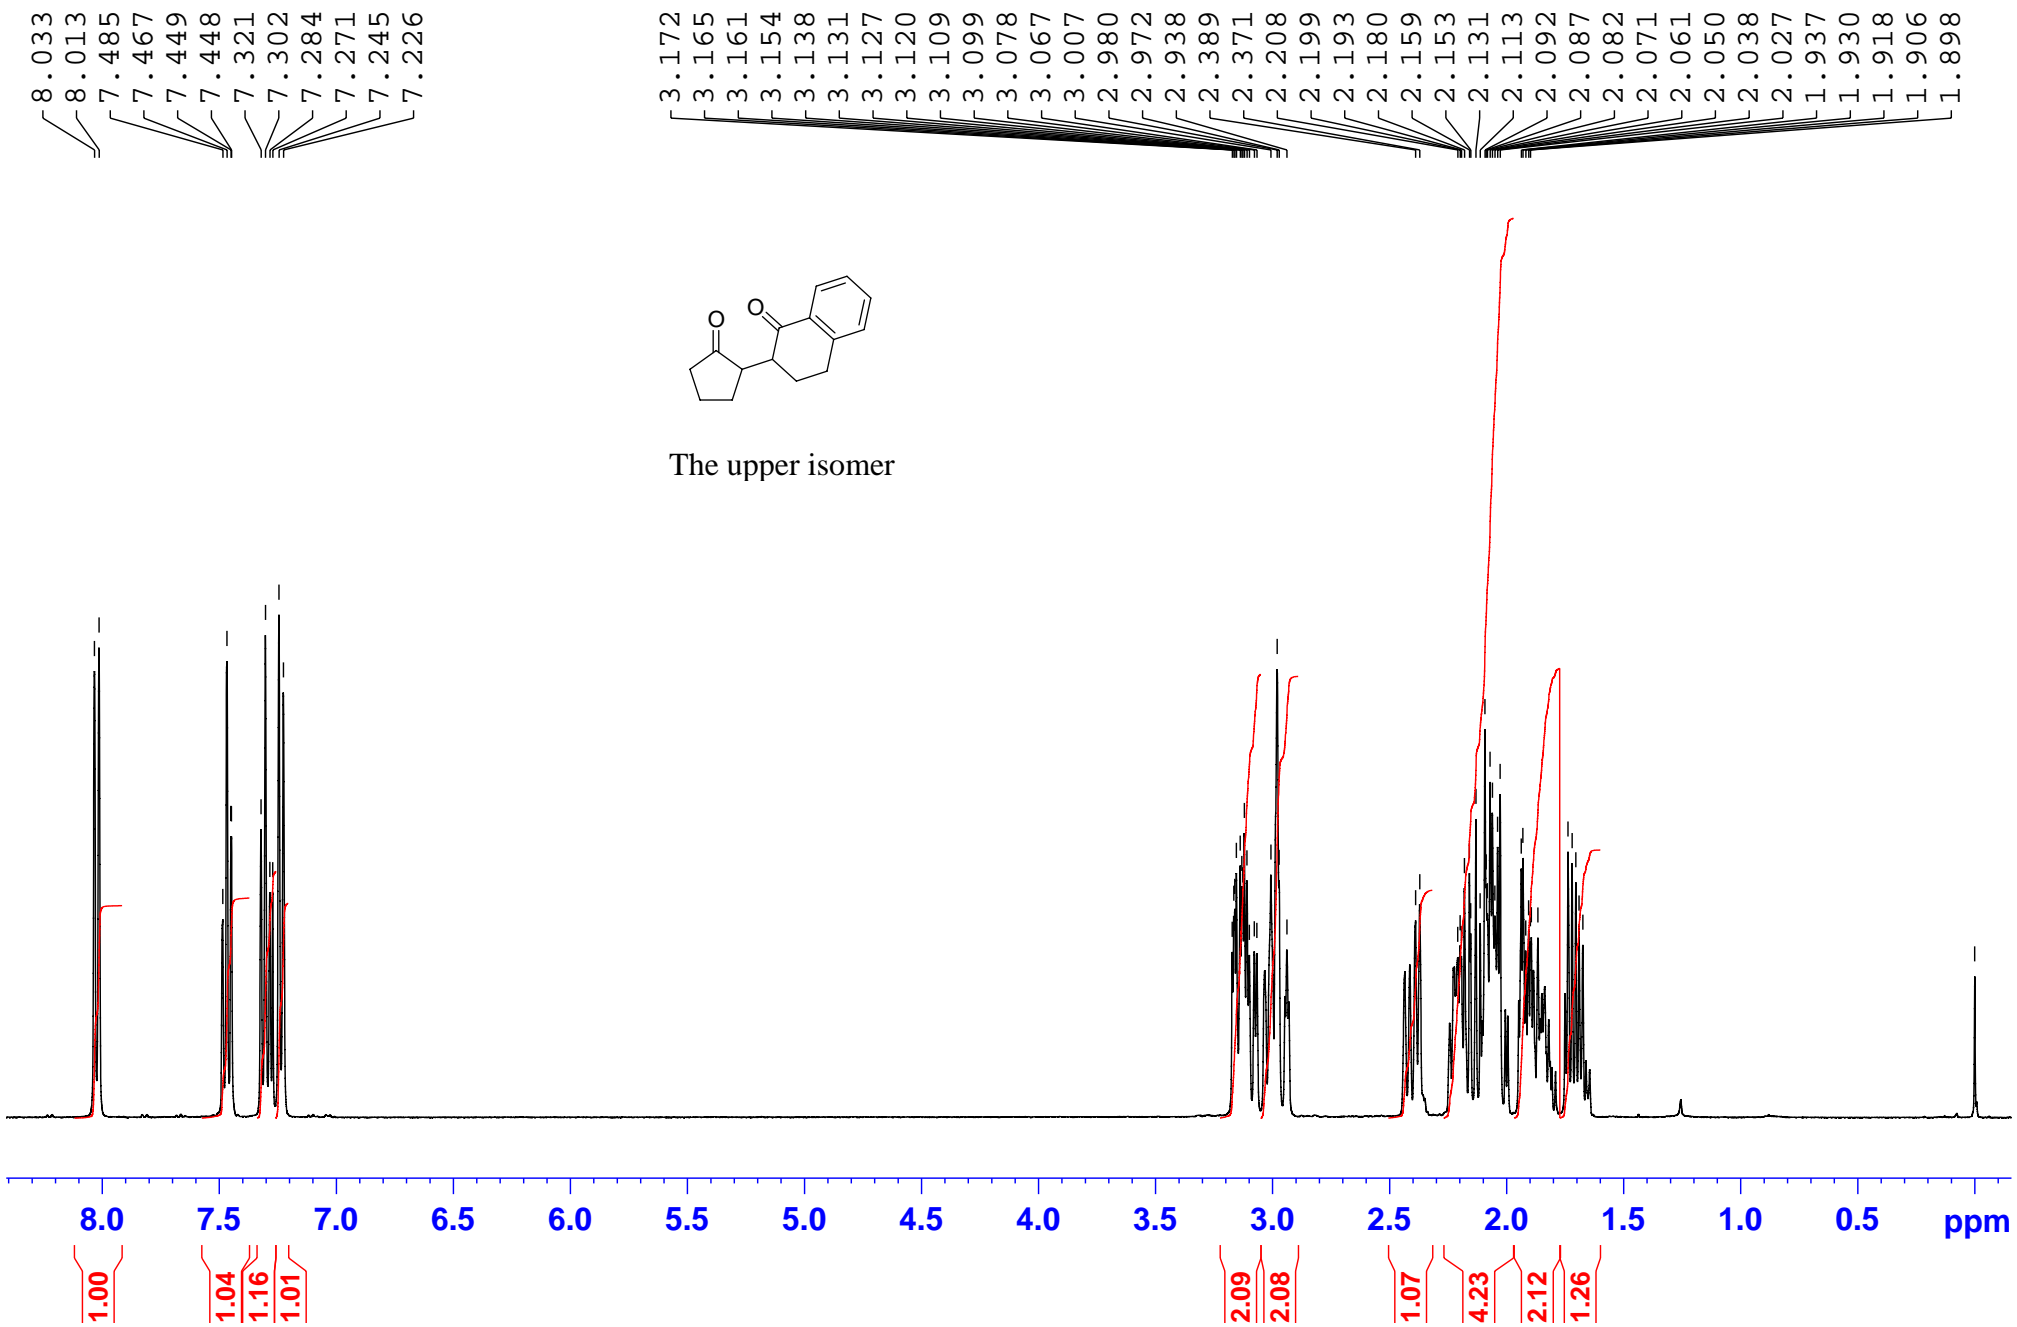



220.66

198.59

144.13

133.41

132.43

128.77

127.38

126.61

49.68

47.76

38.54

29.65

26.11

25.52

20.80

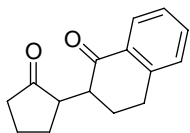

The upper isomer

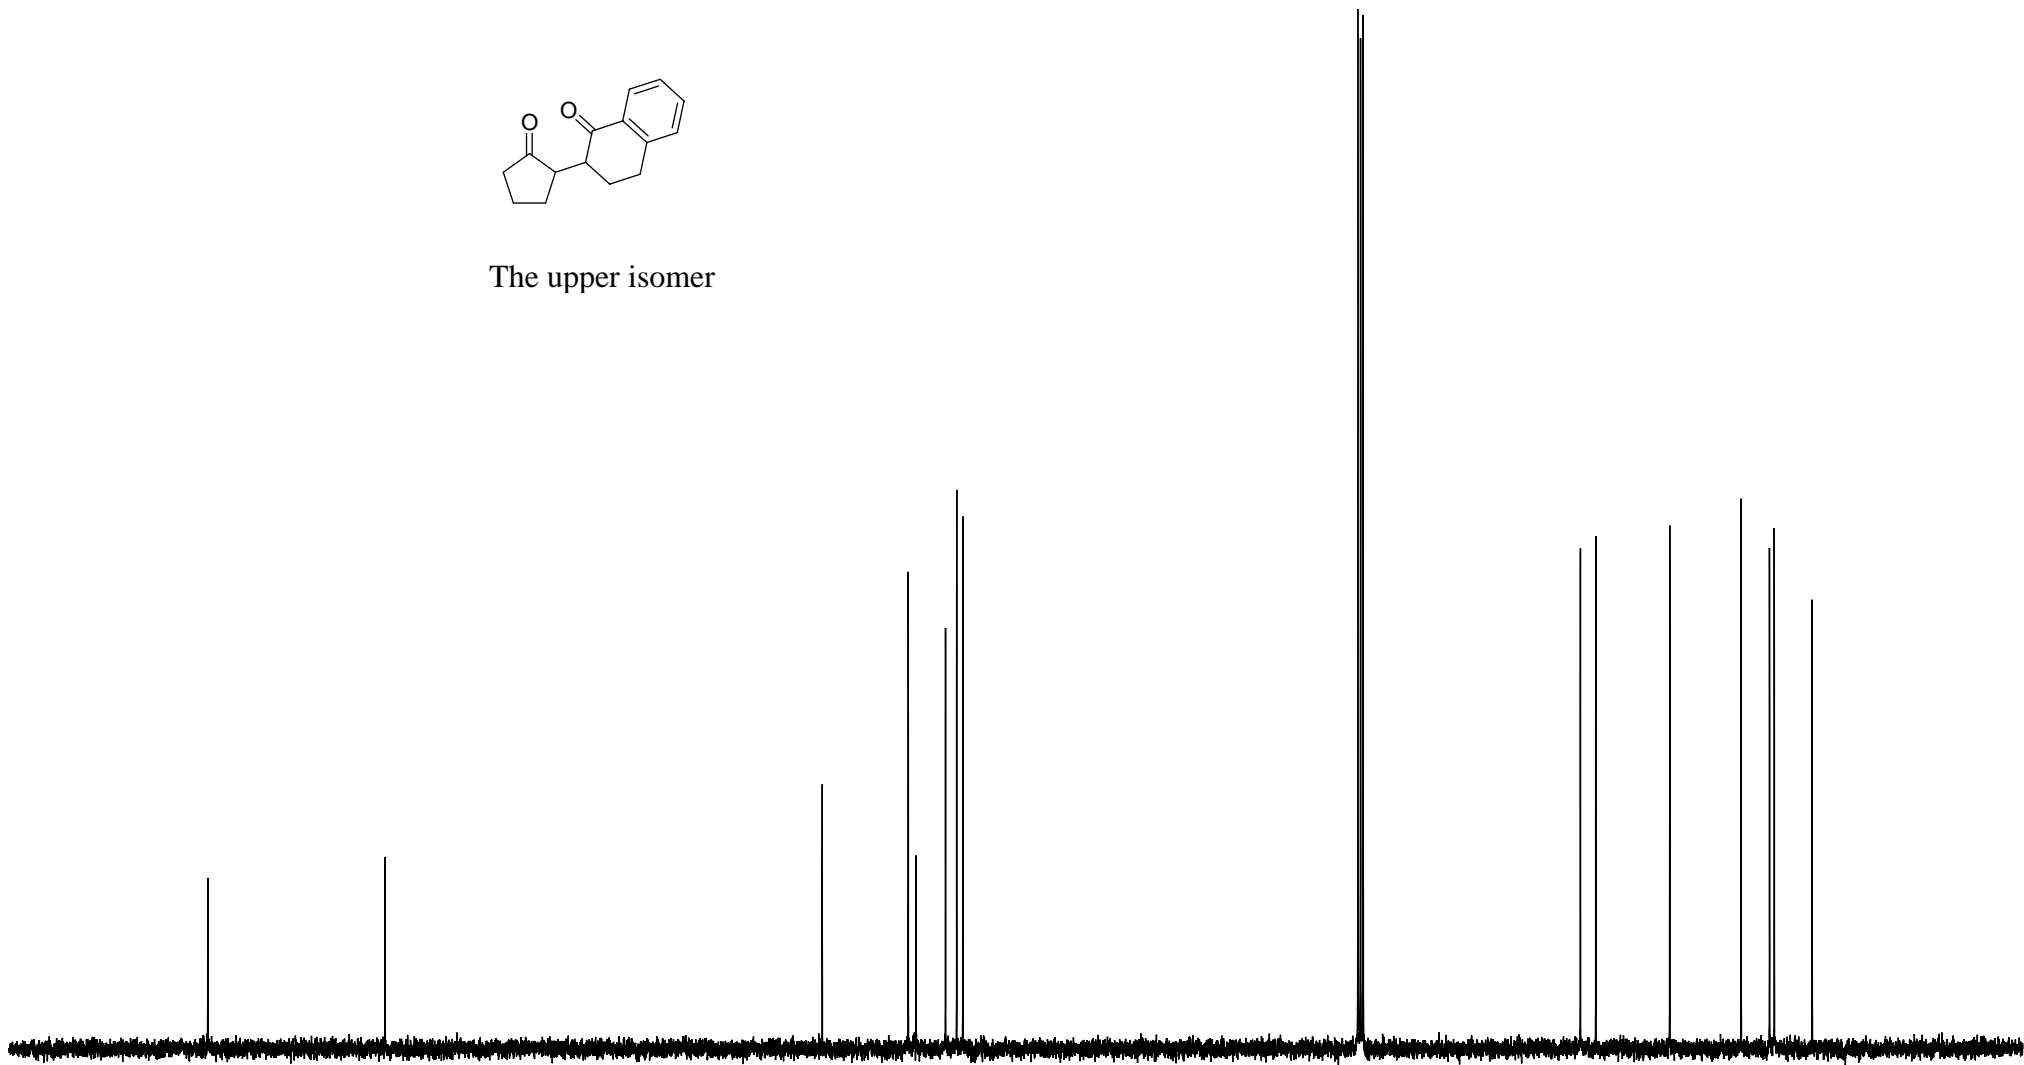

240 230 220 210 200 190 180 170 160 150 140 130 120 110 100 90 80 70 60 50 40 30 20 10 ppm

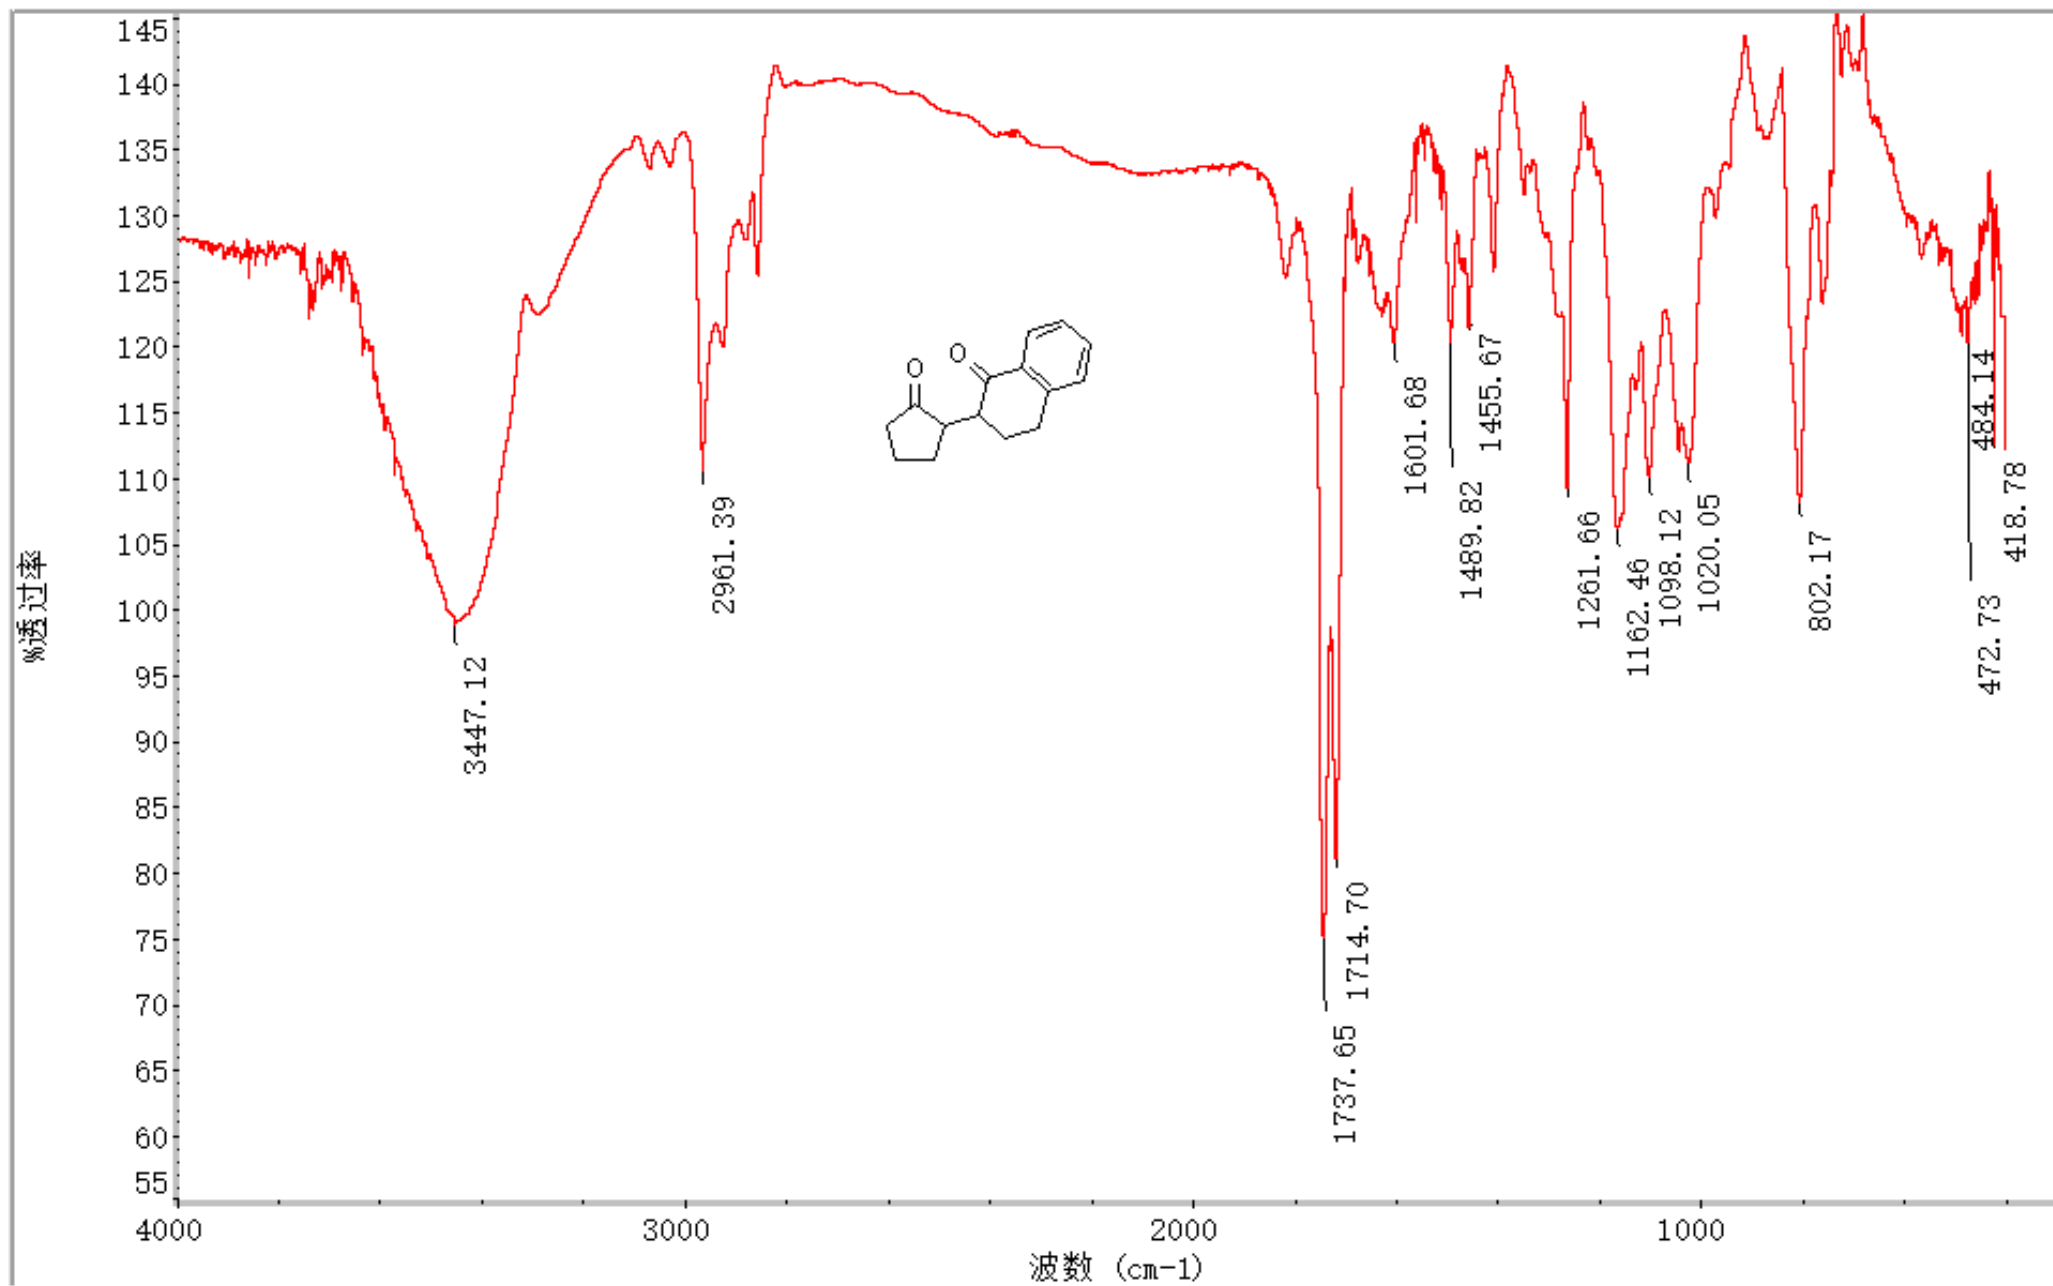

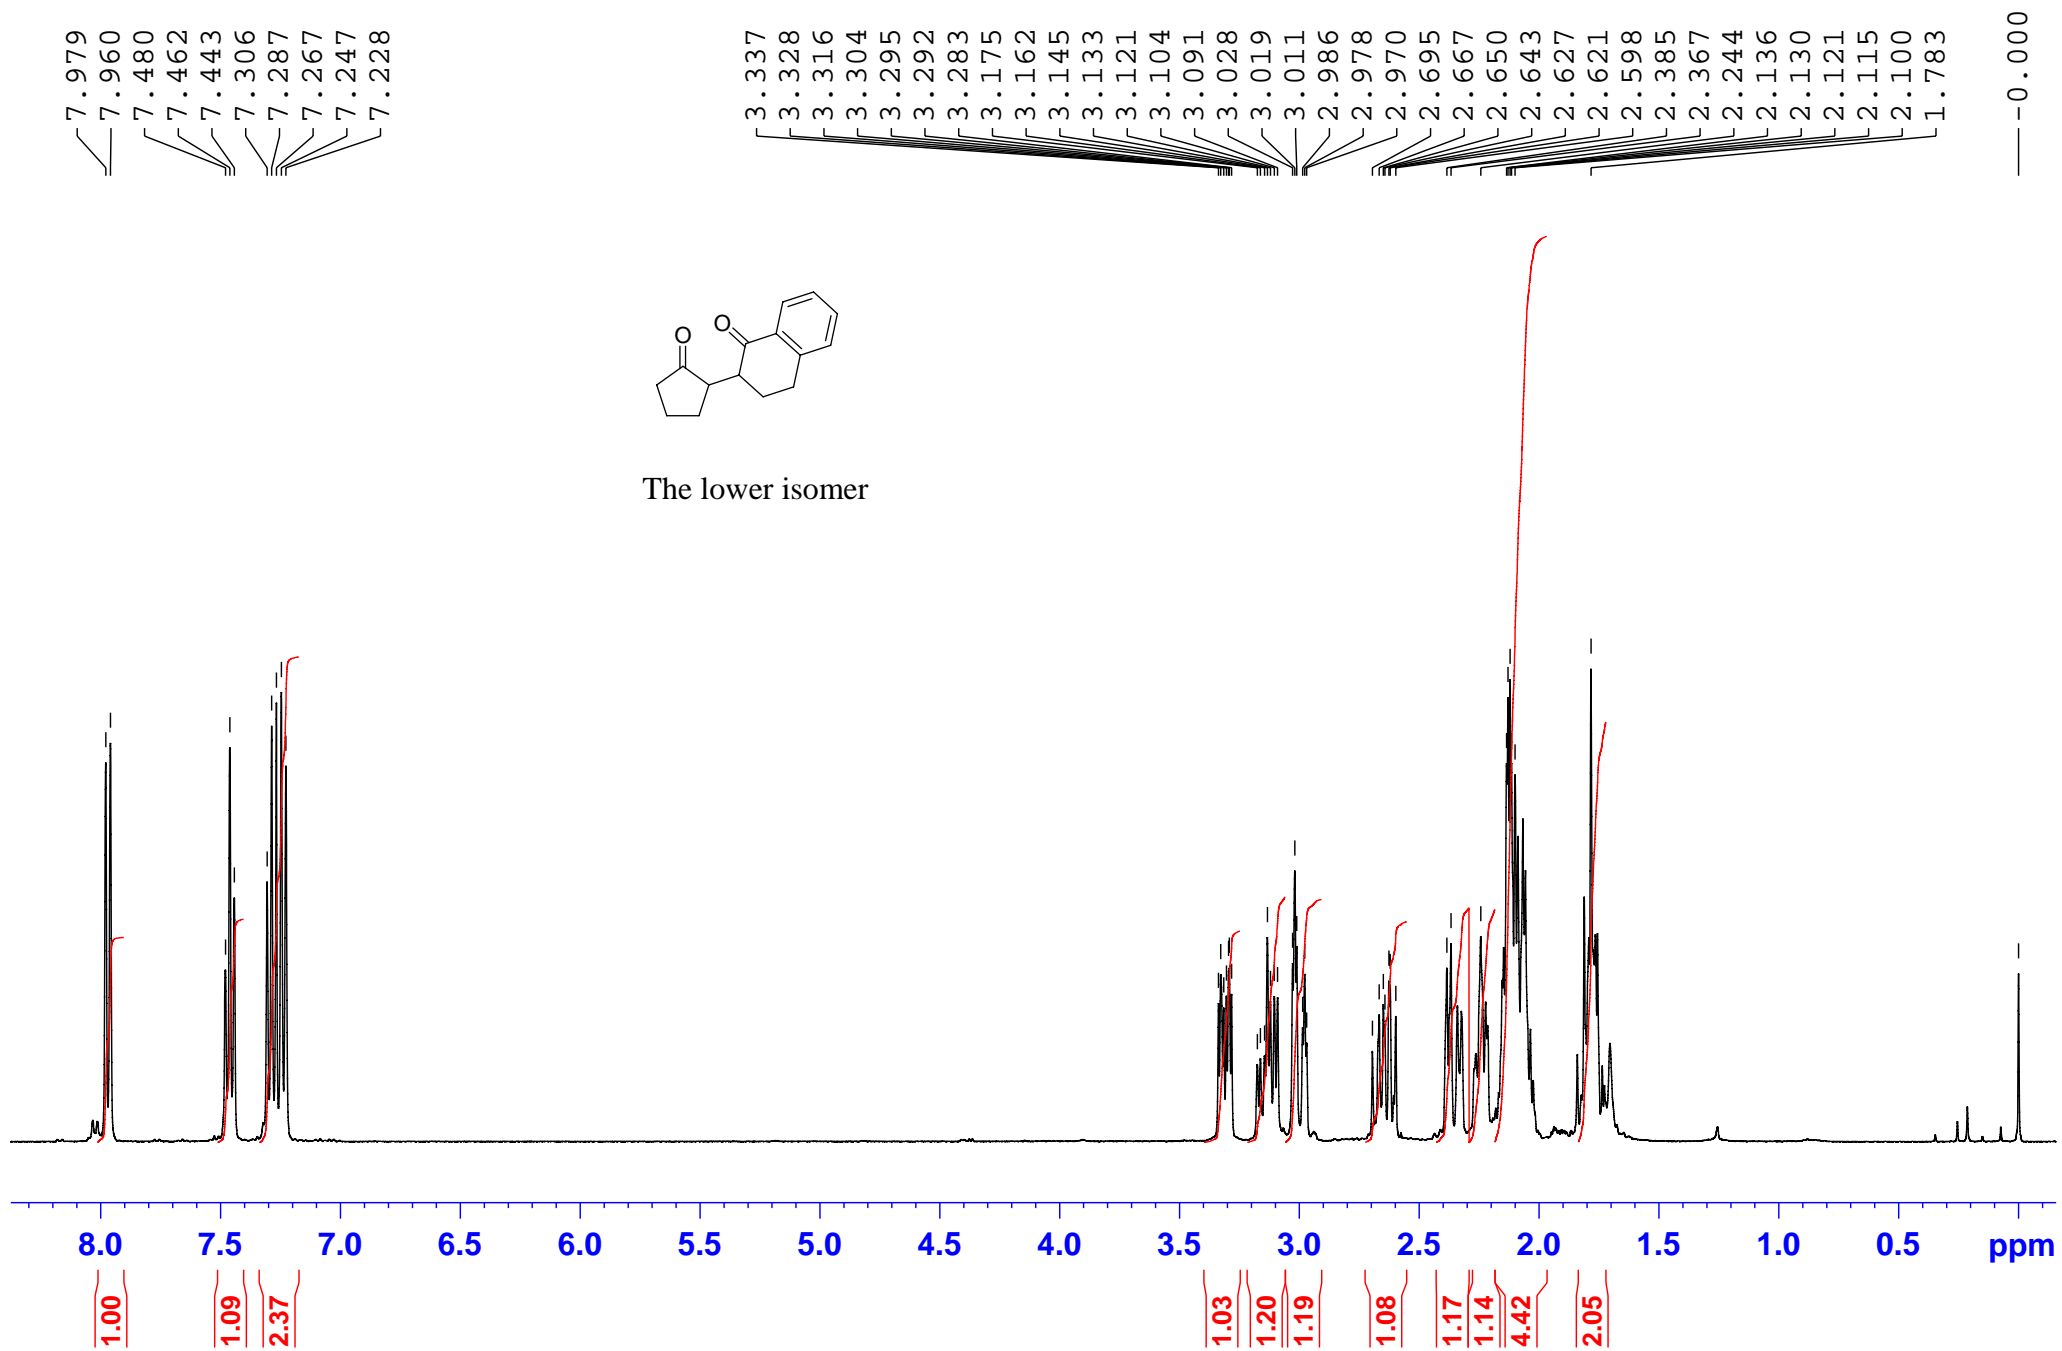

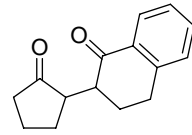

The lower isomer

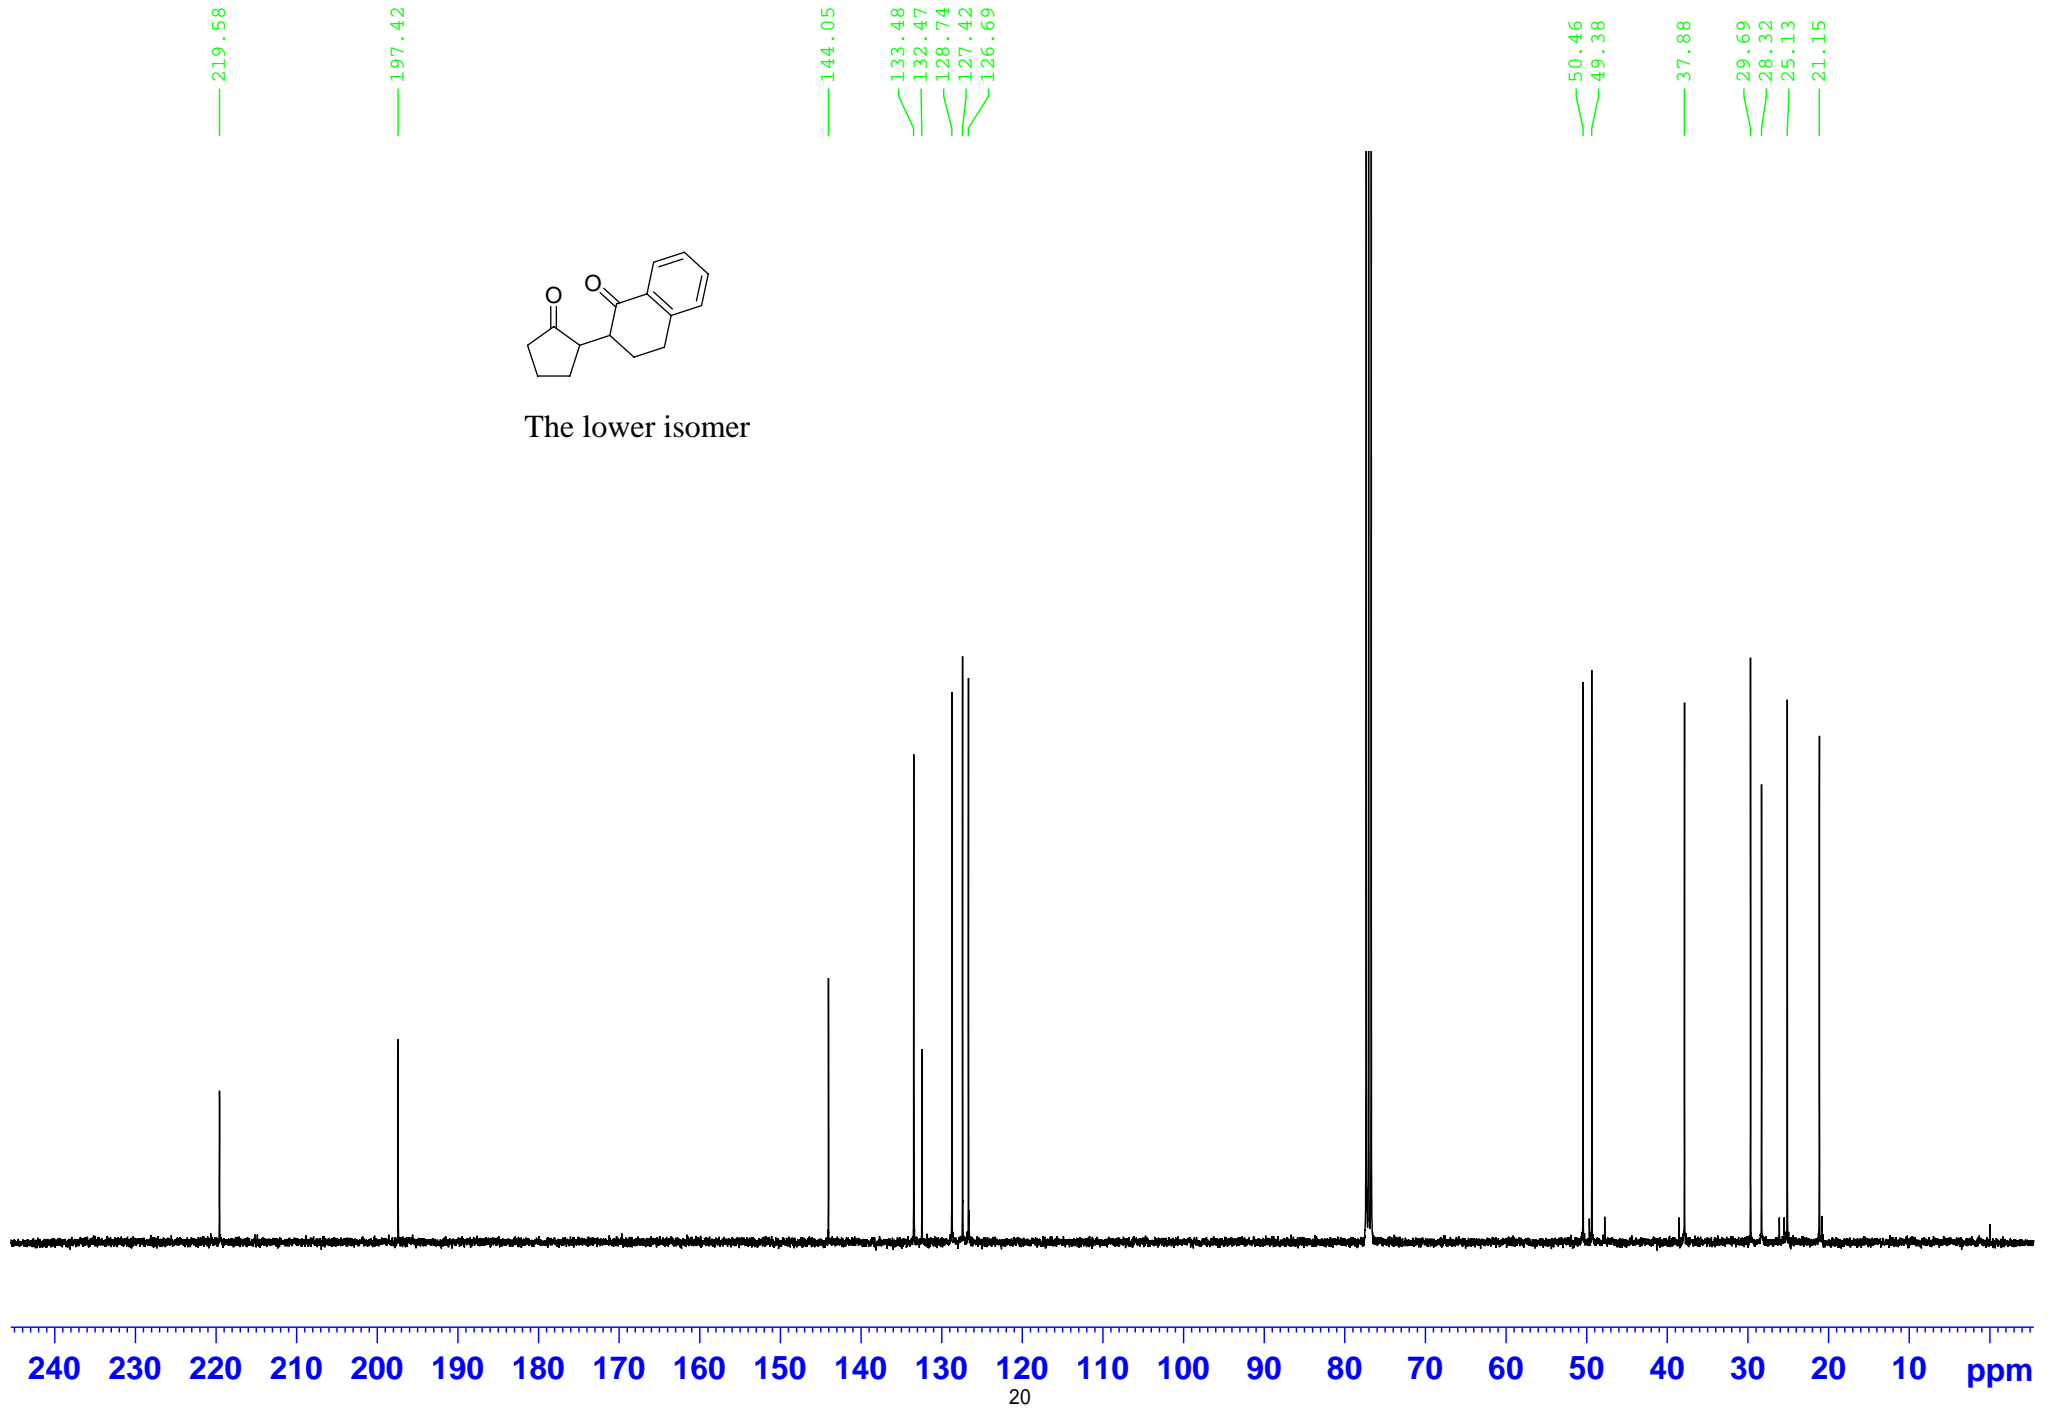

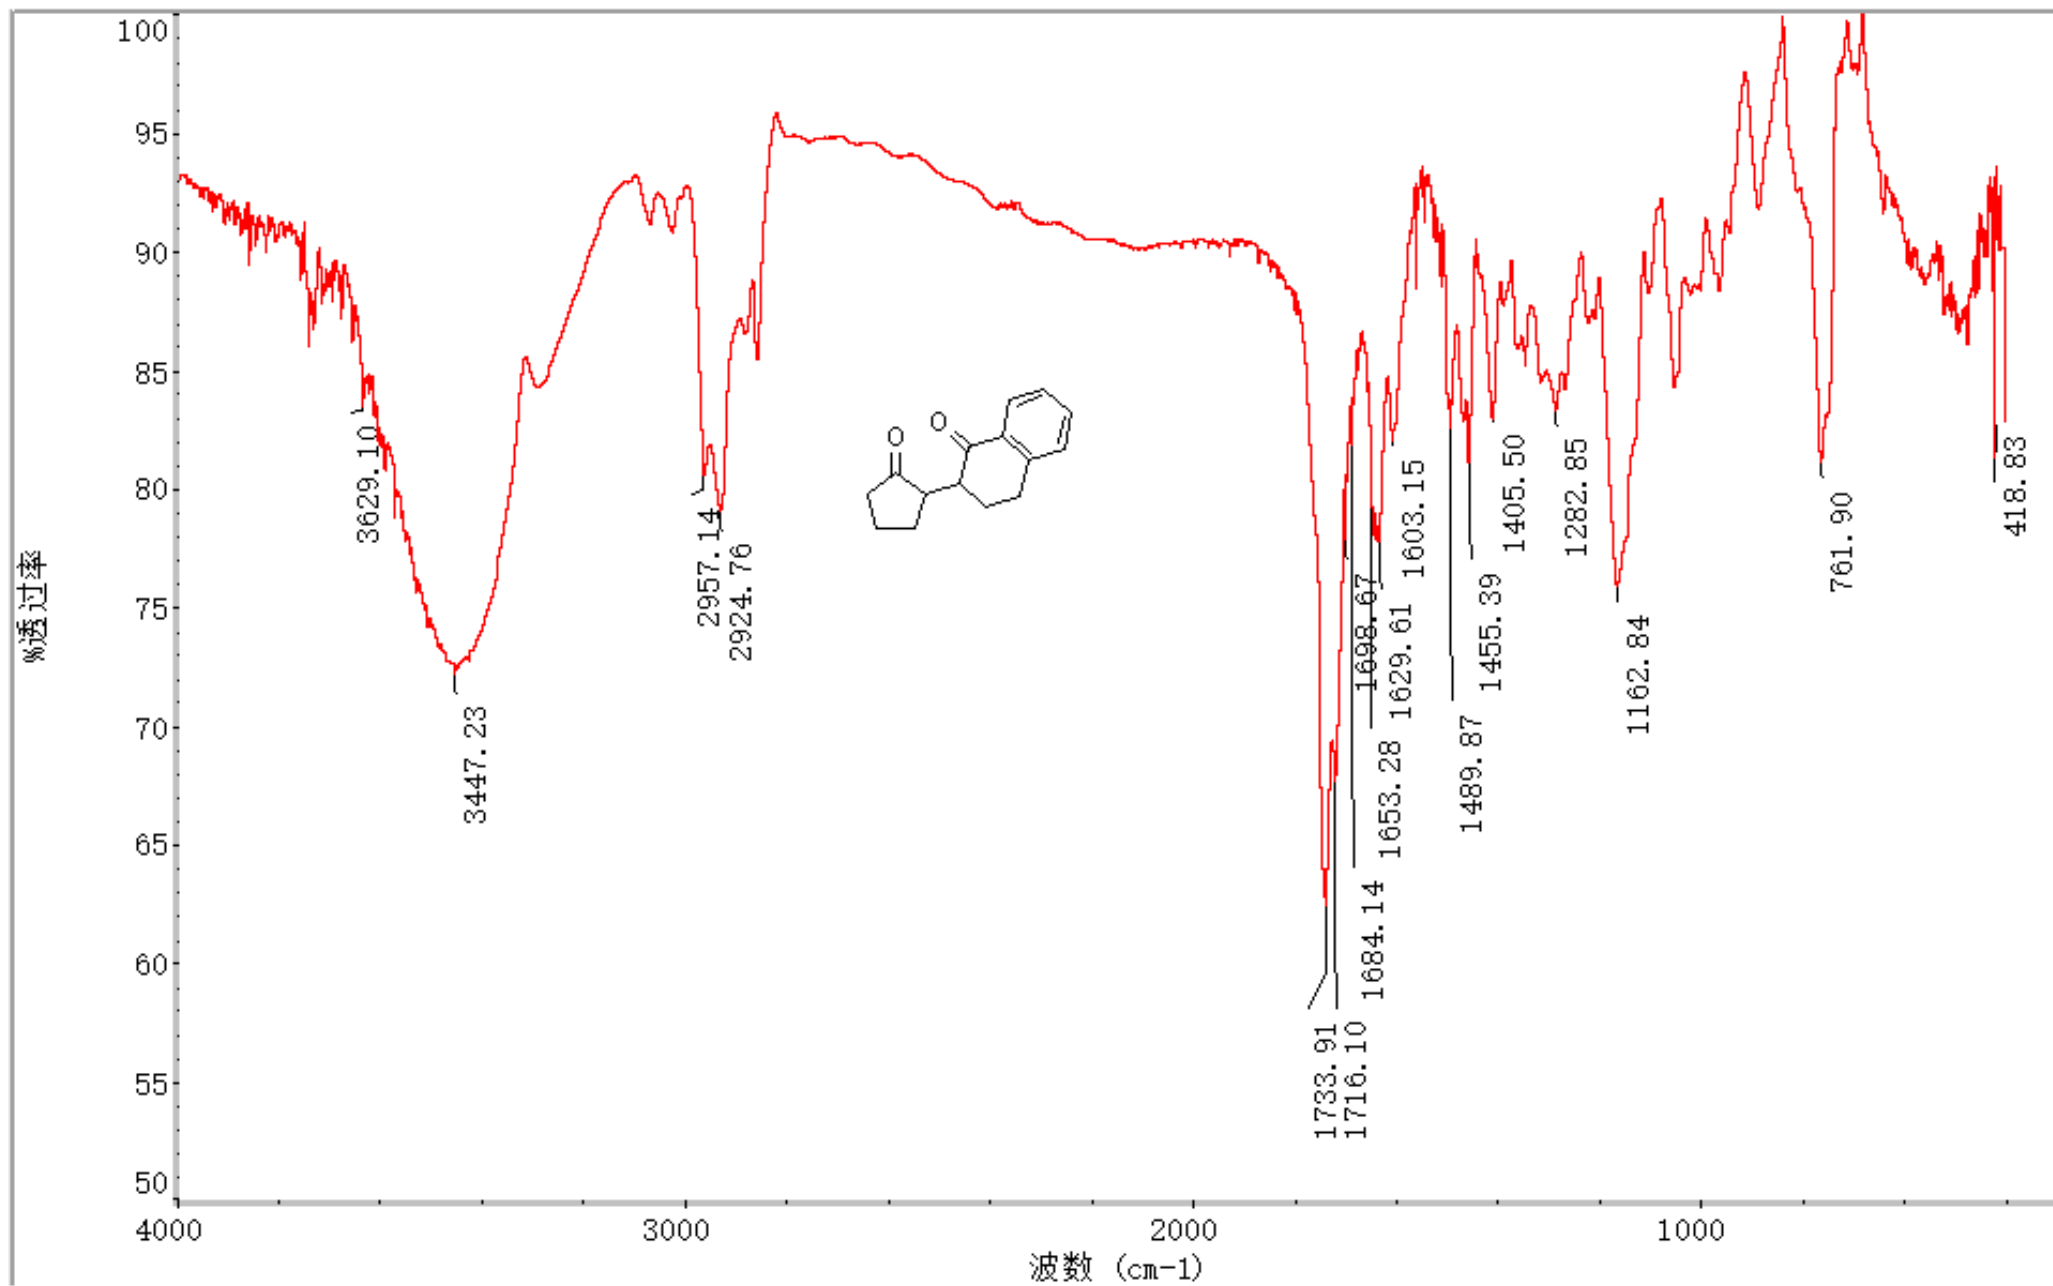

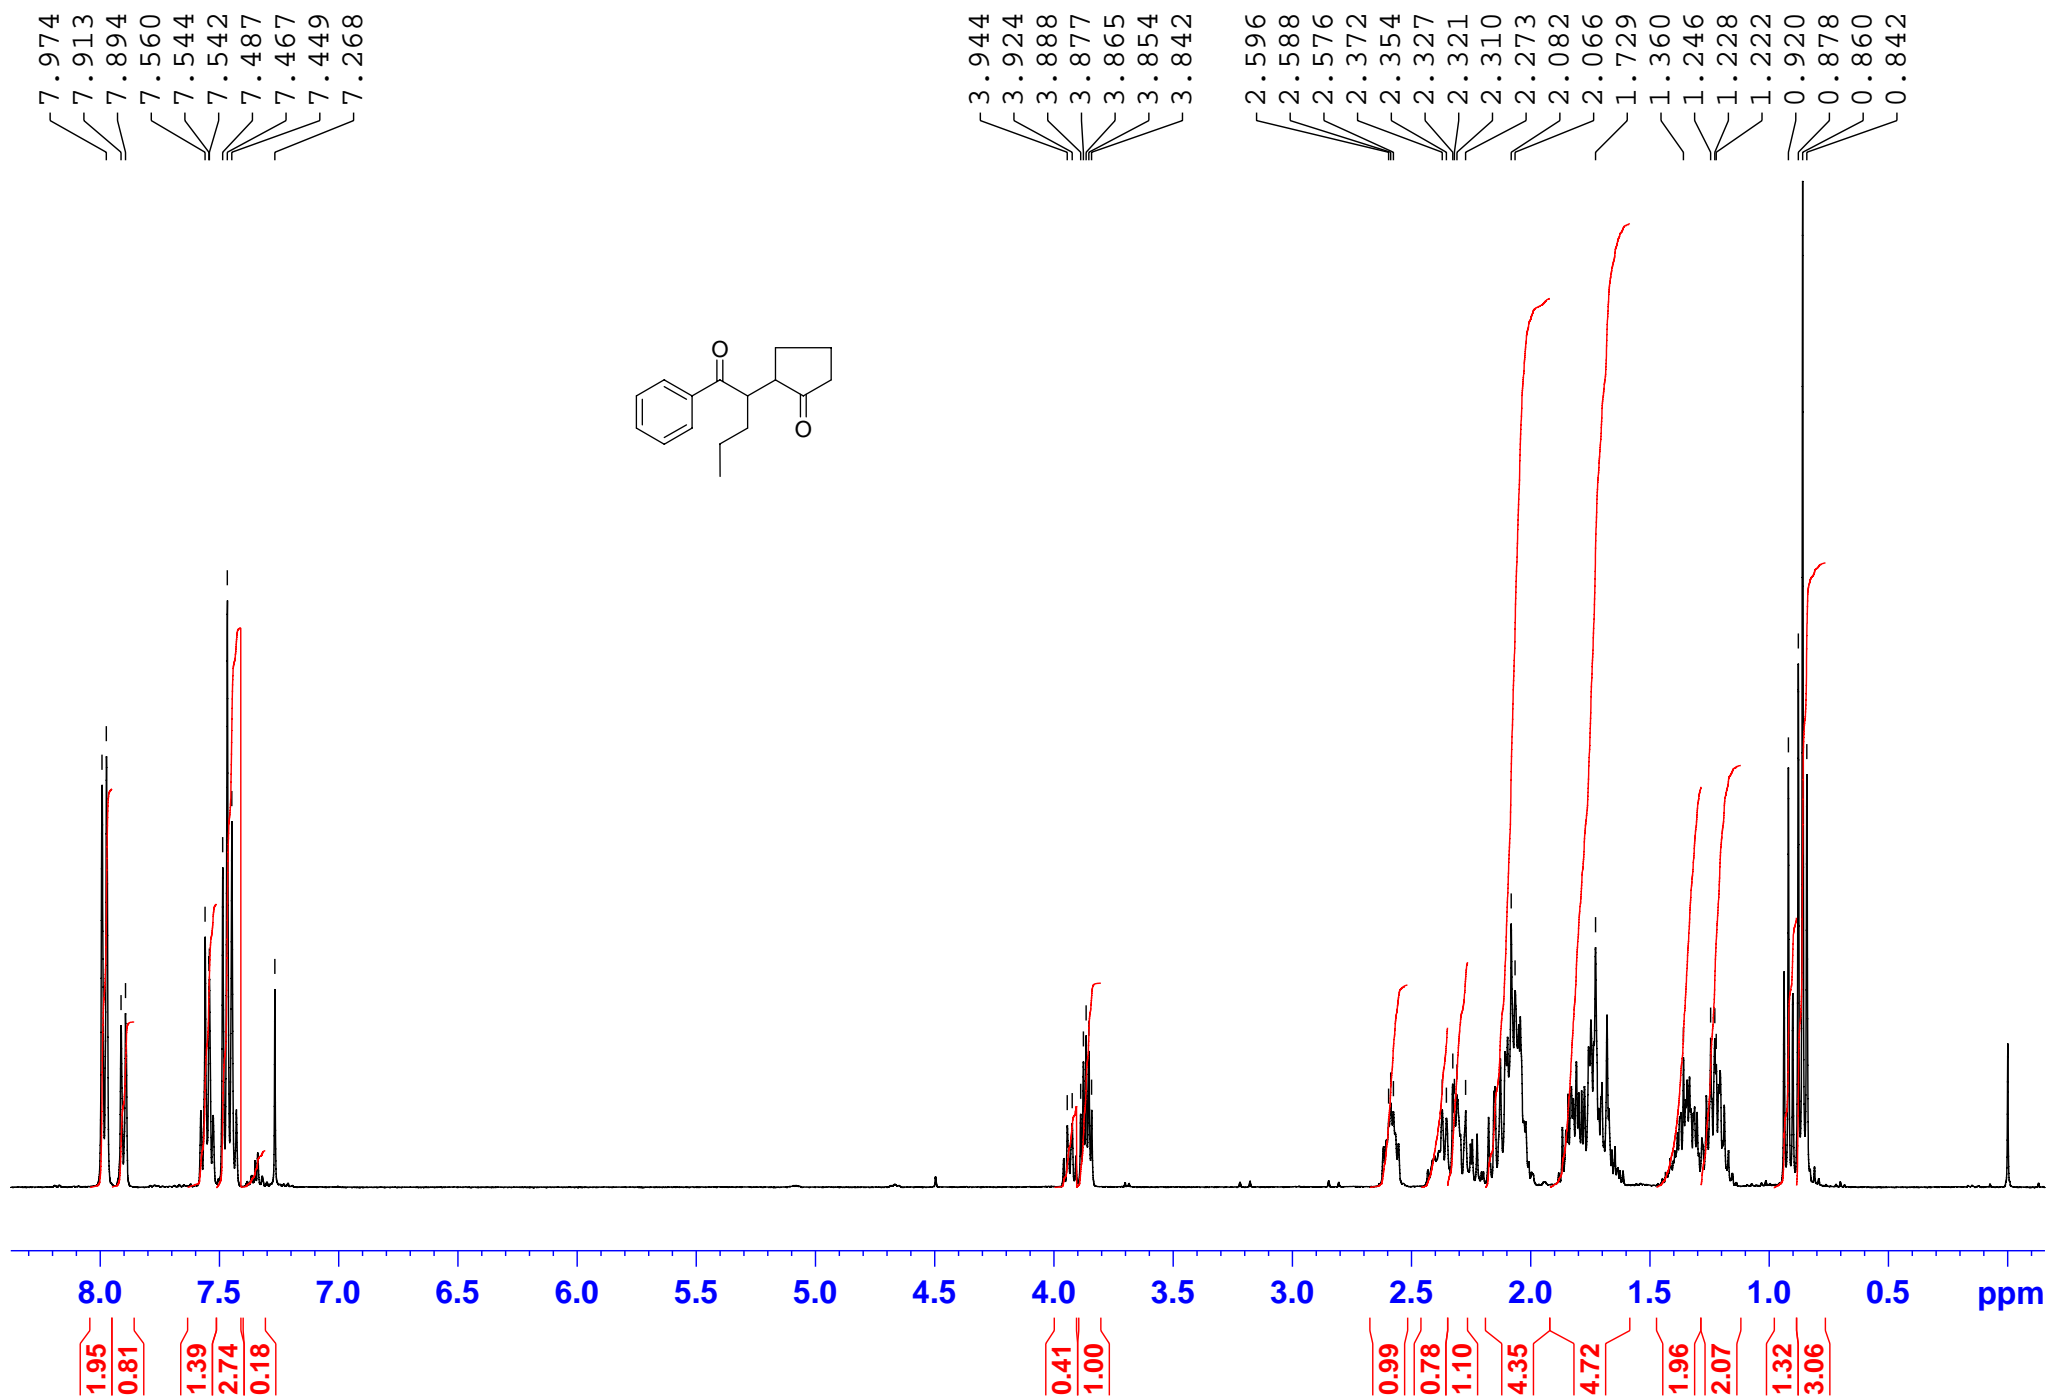

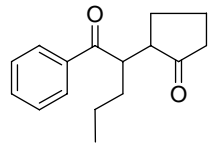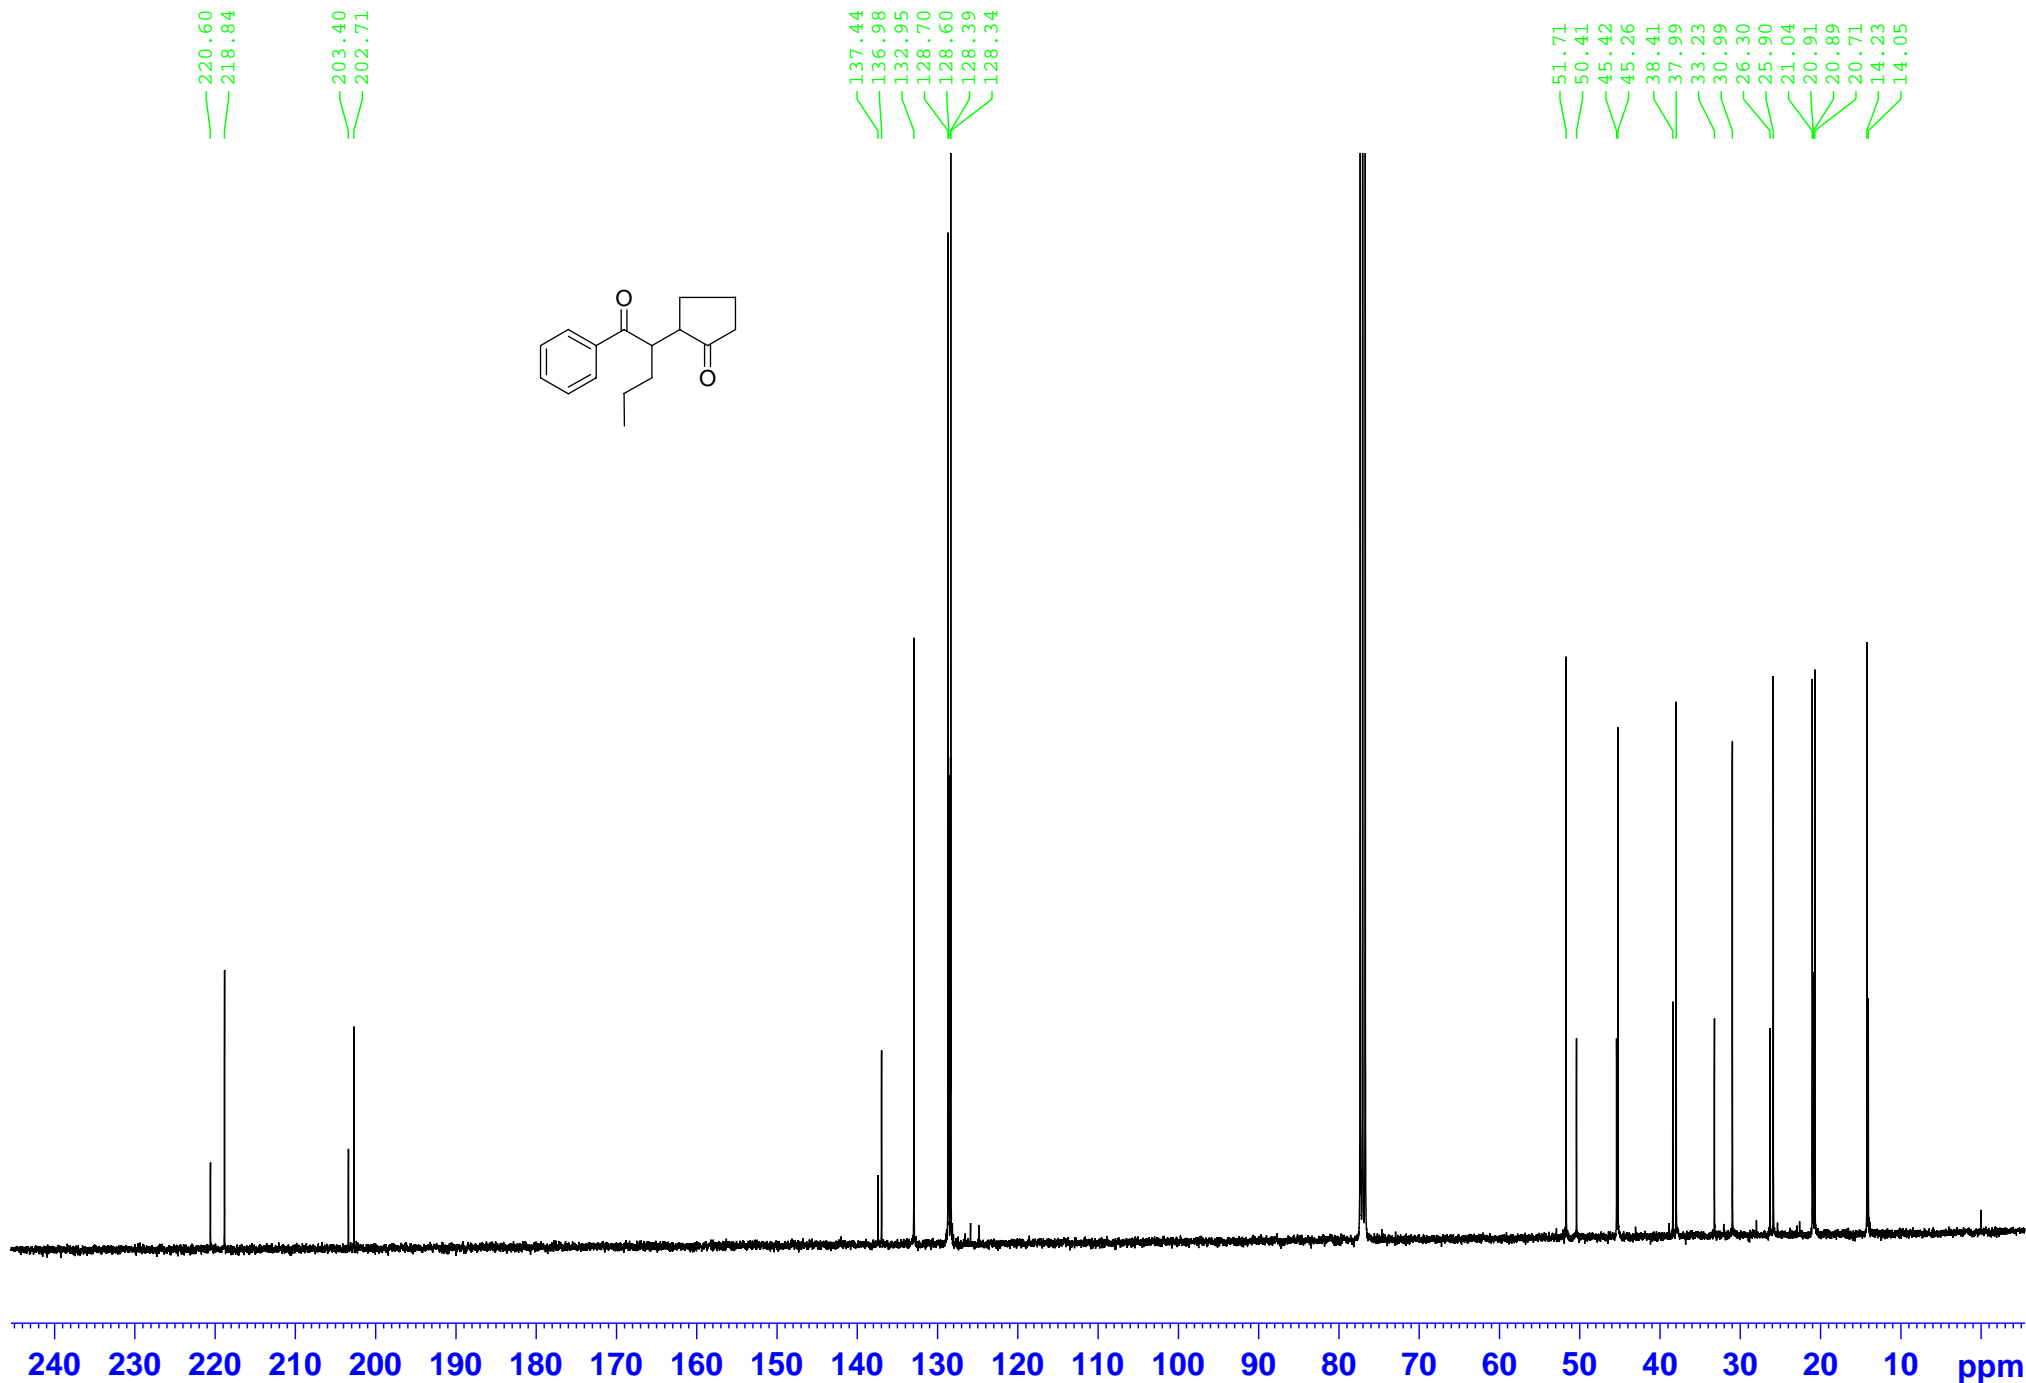

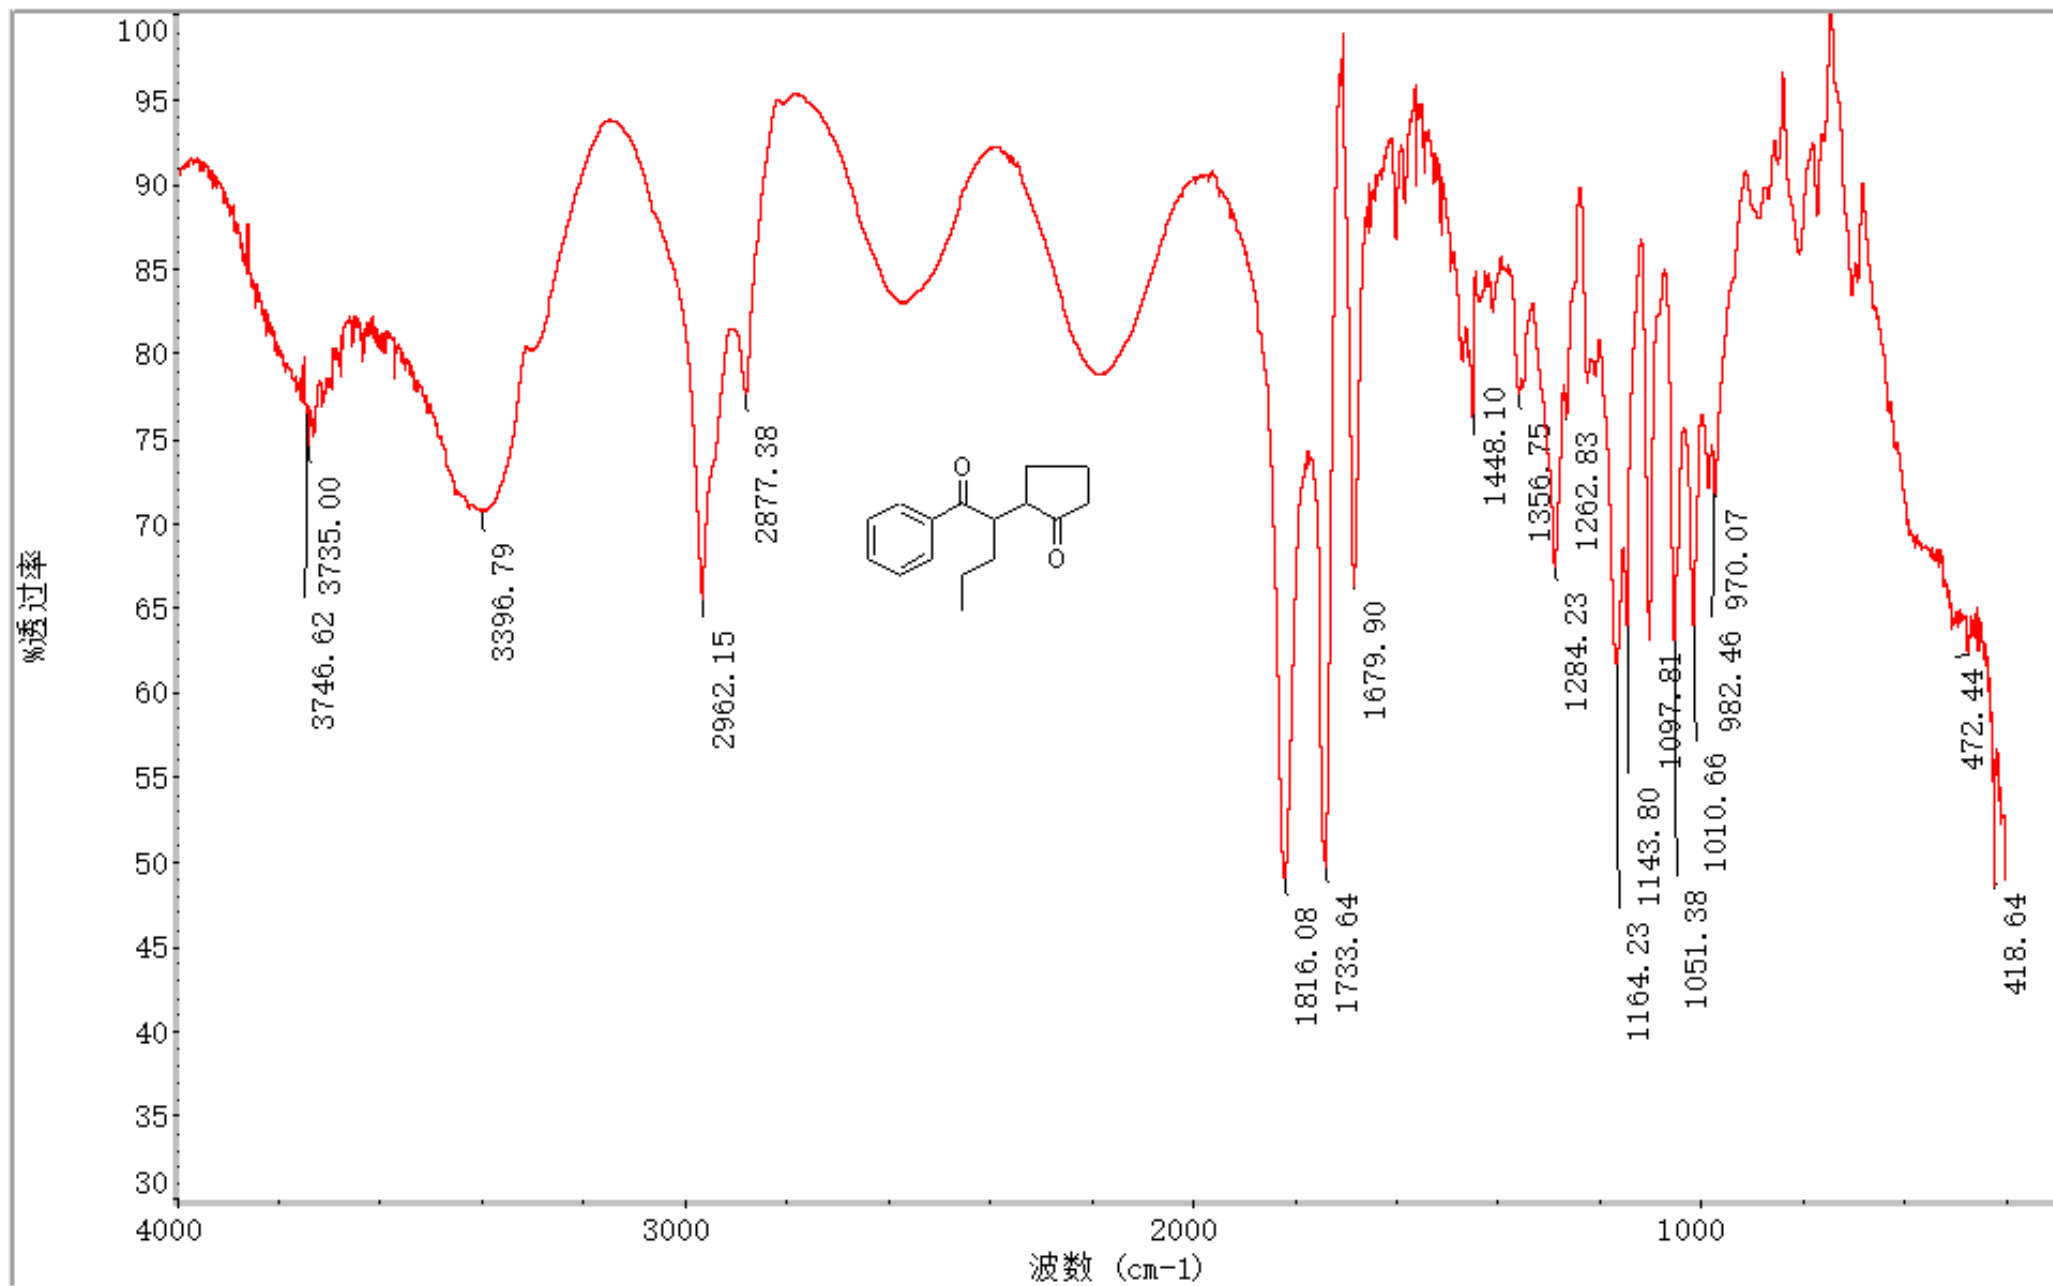



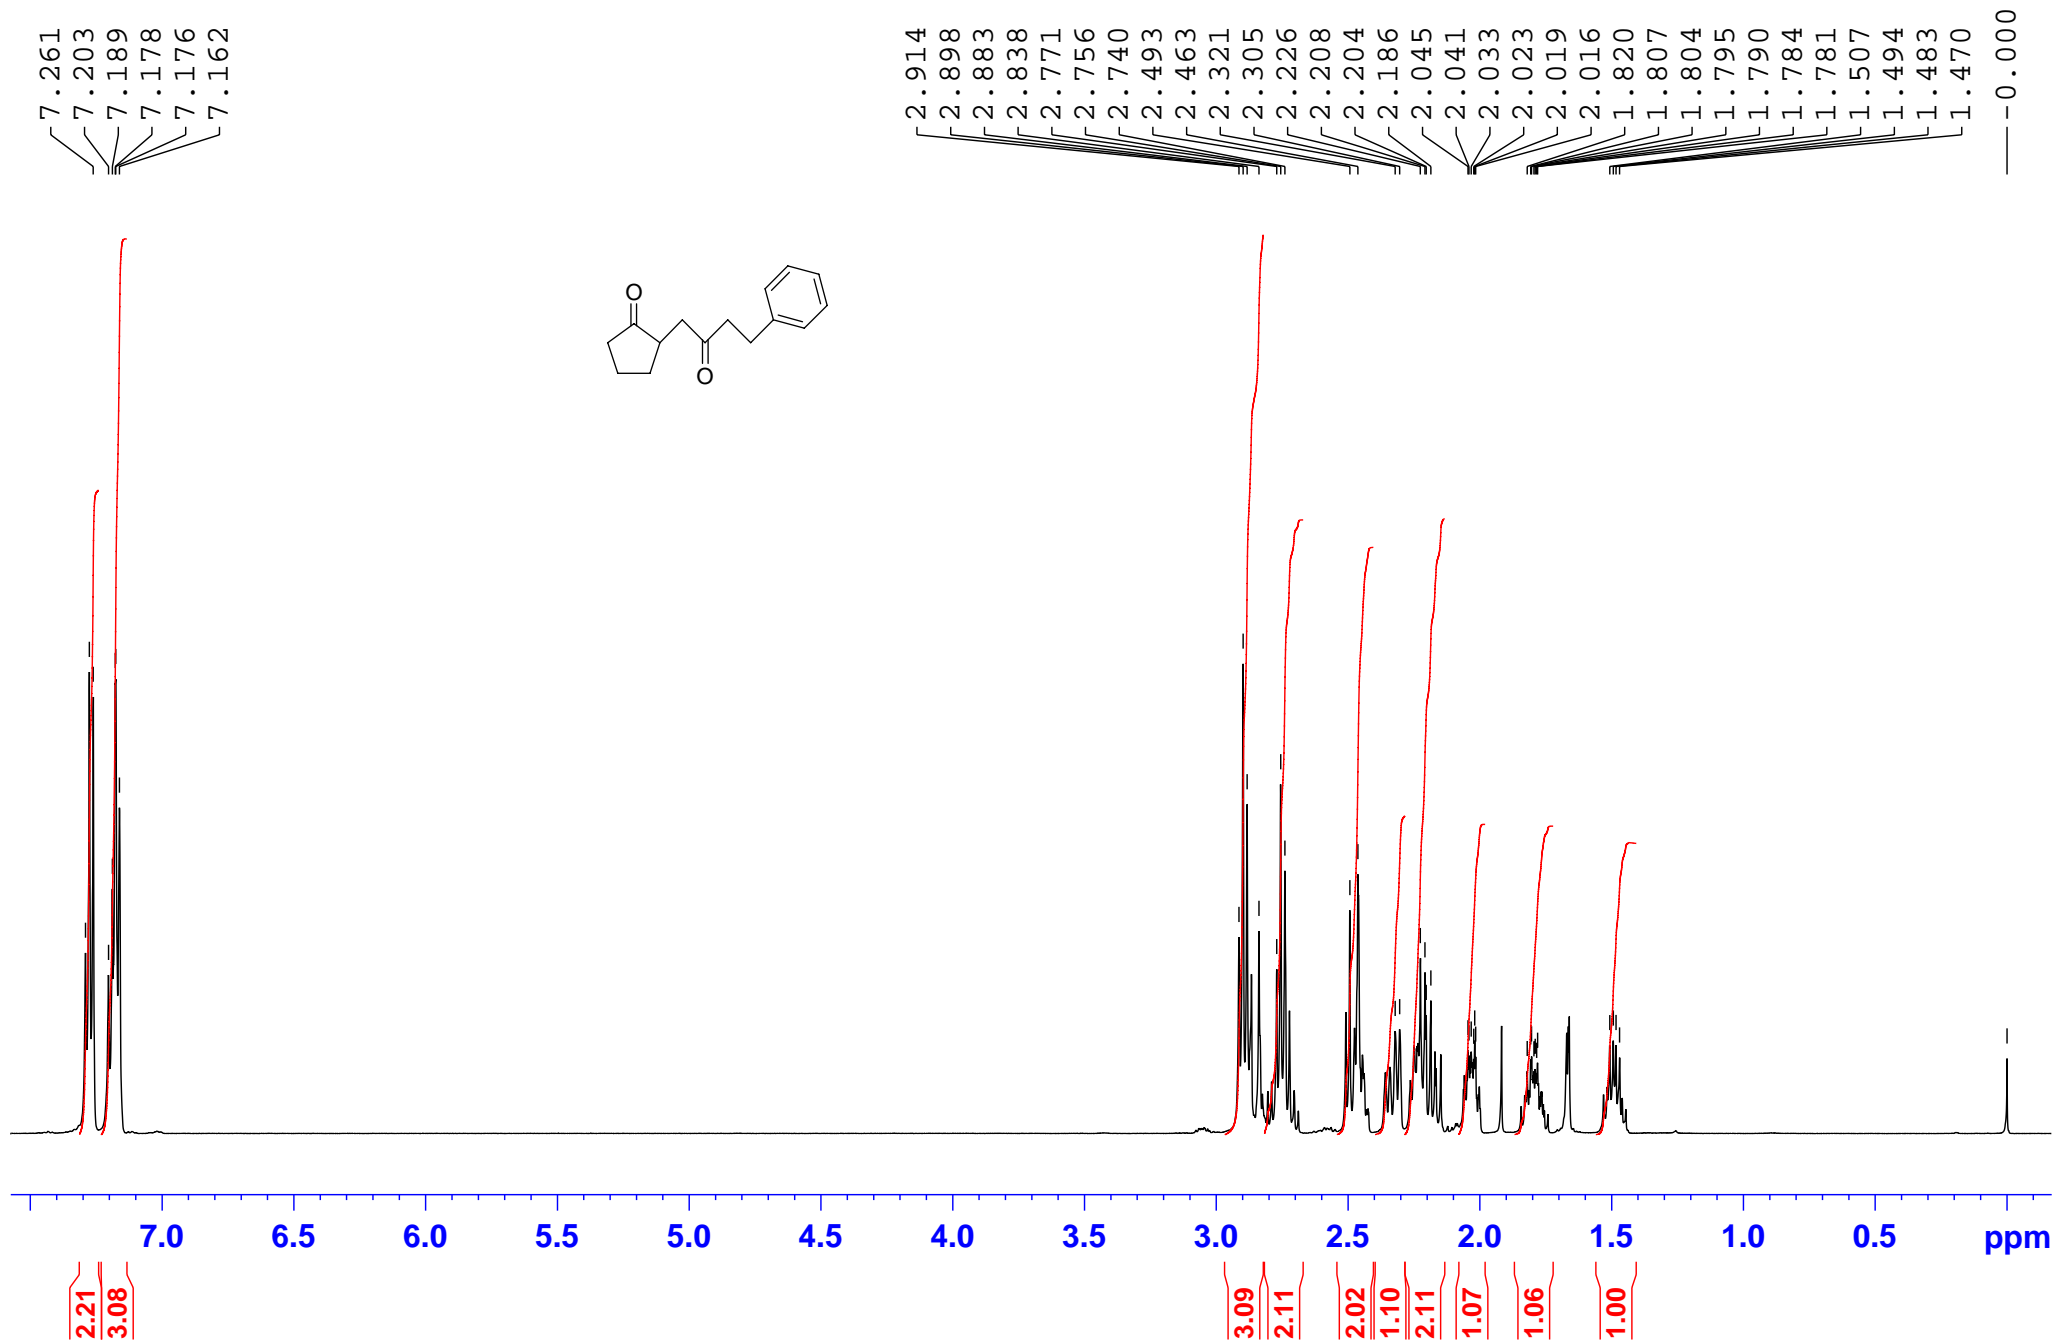

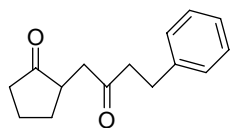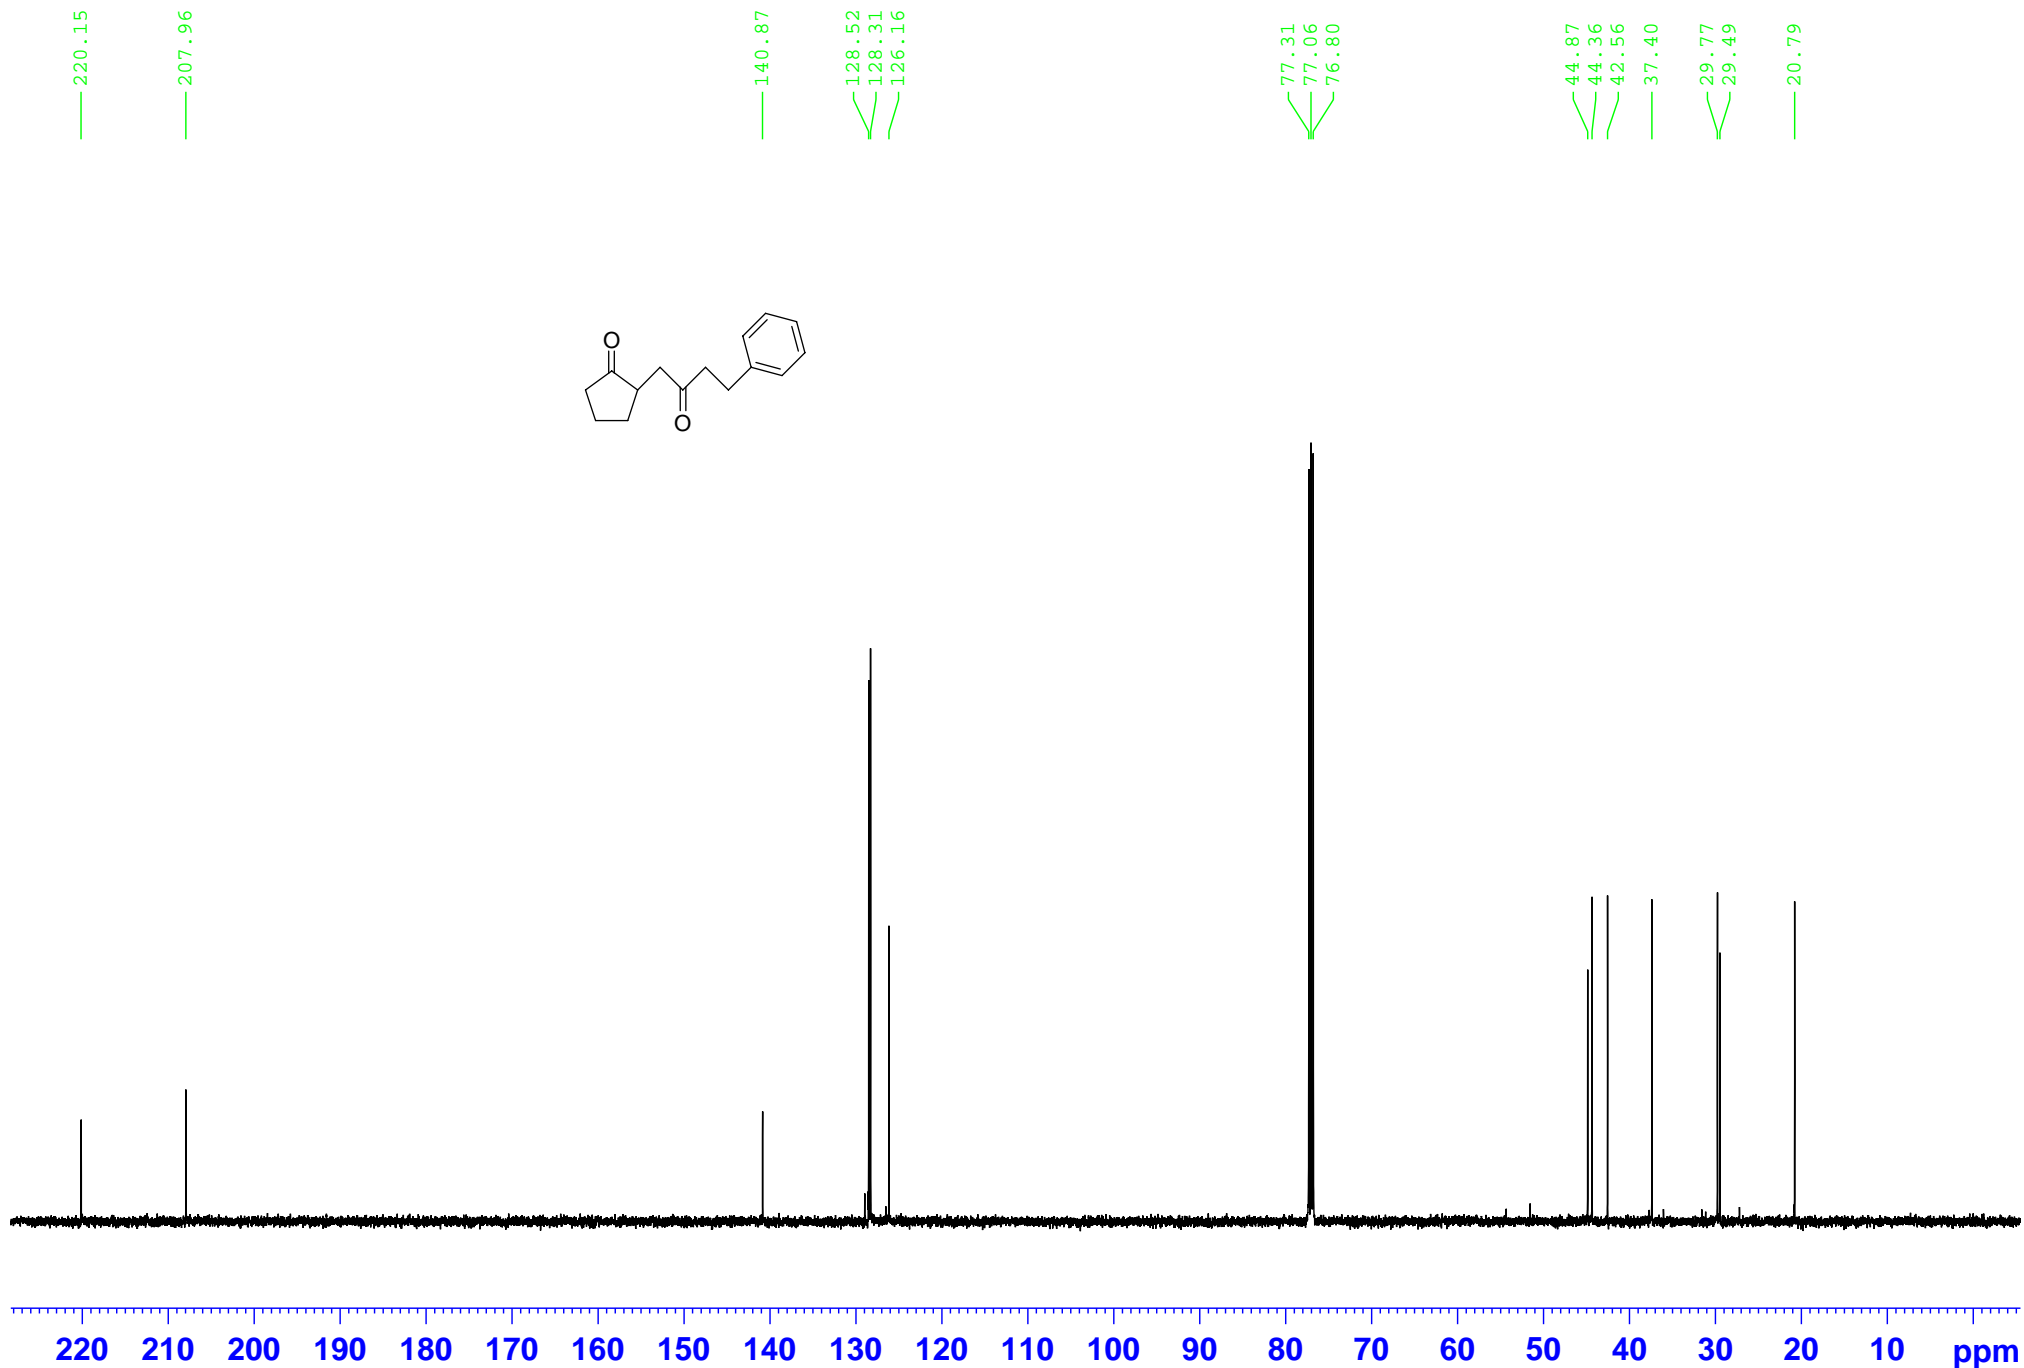

— 7.282

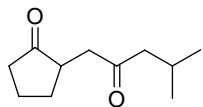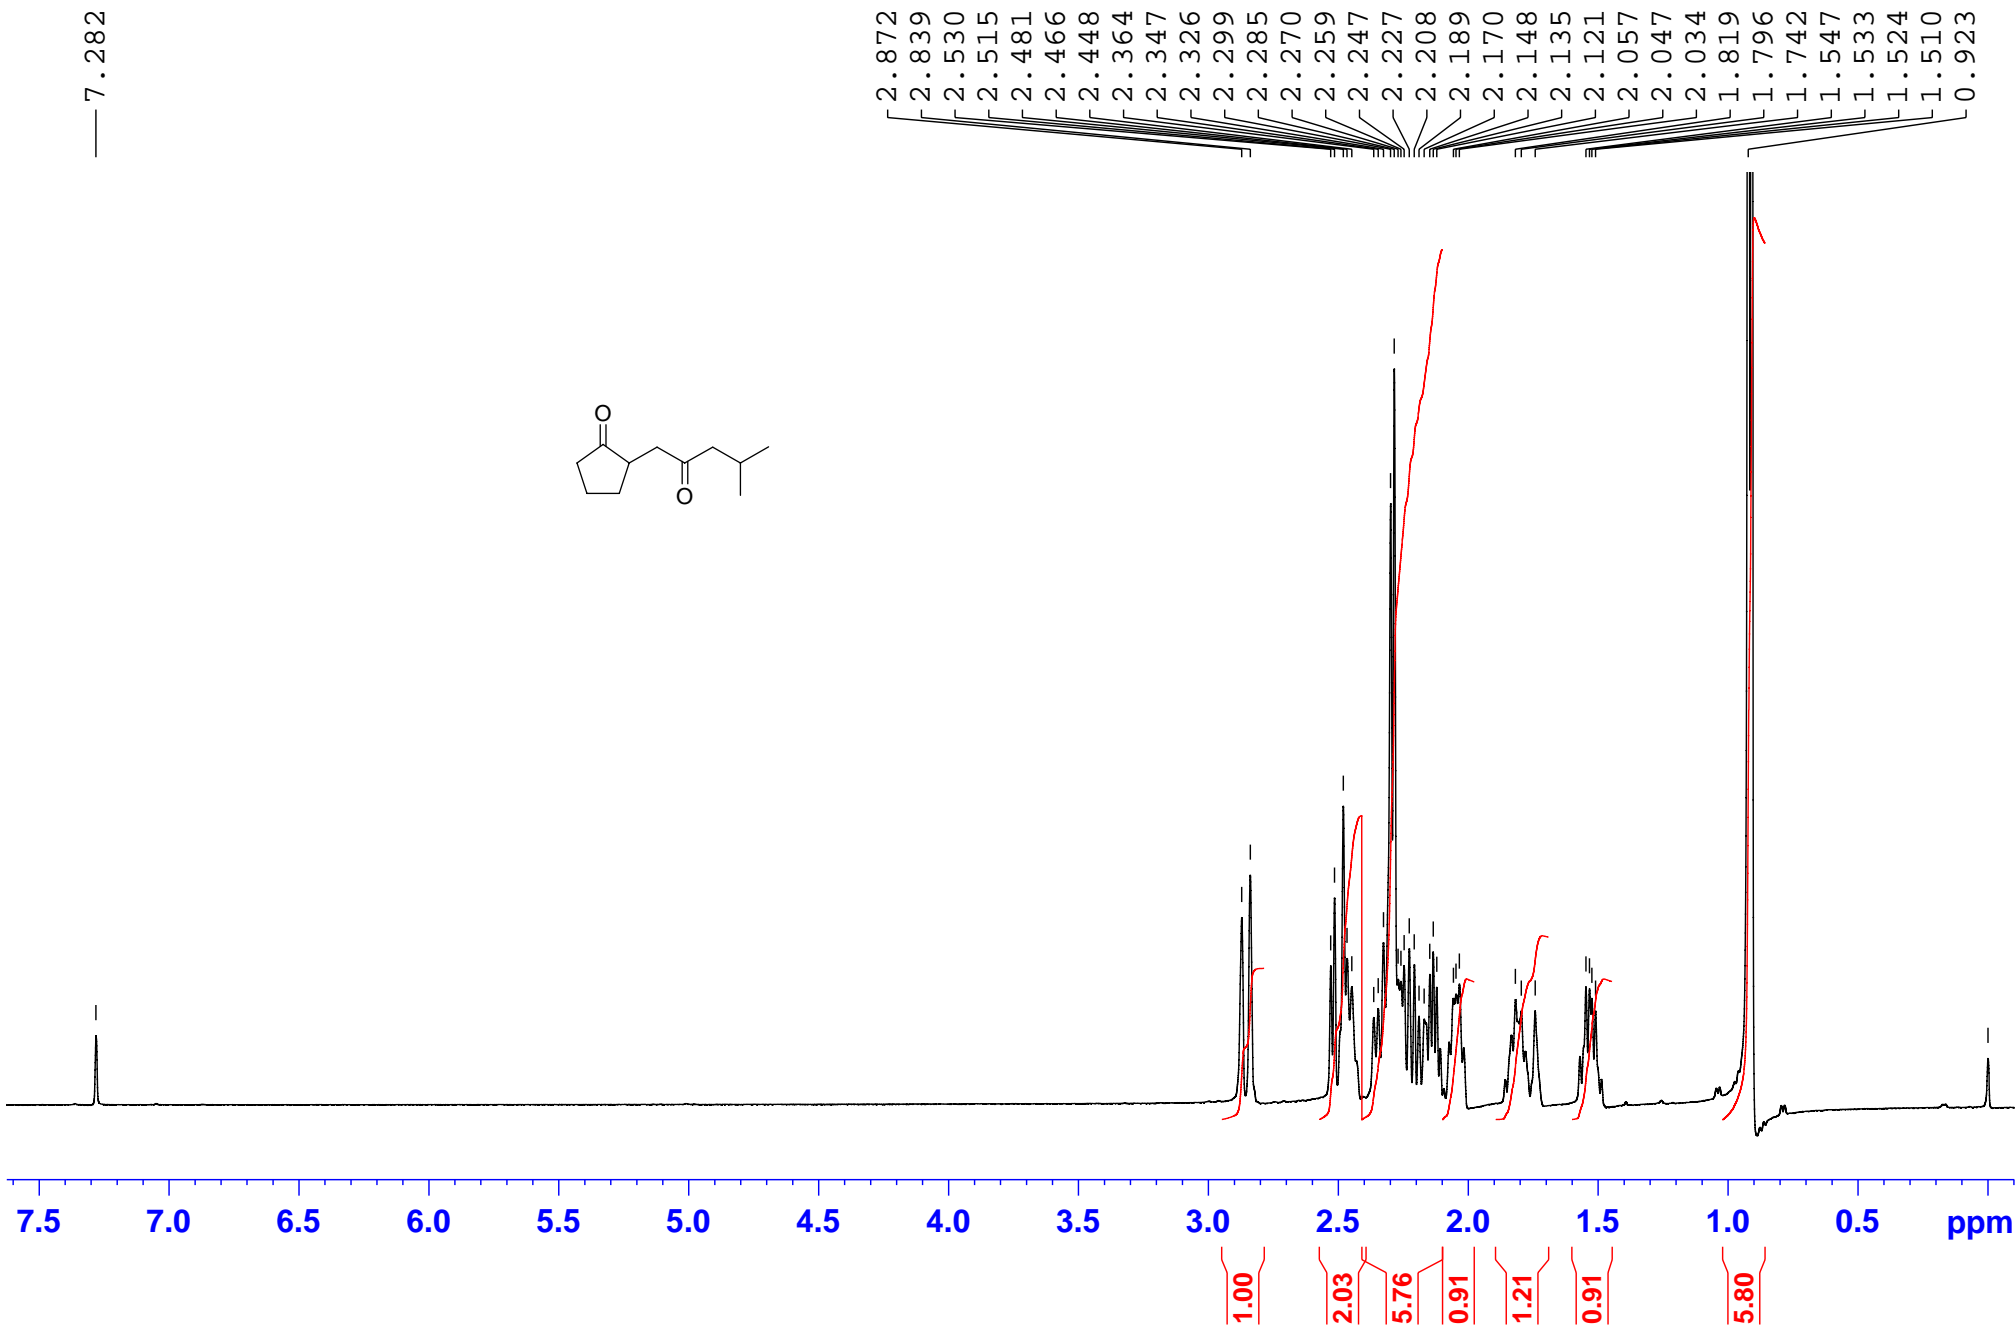

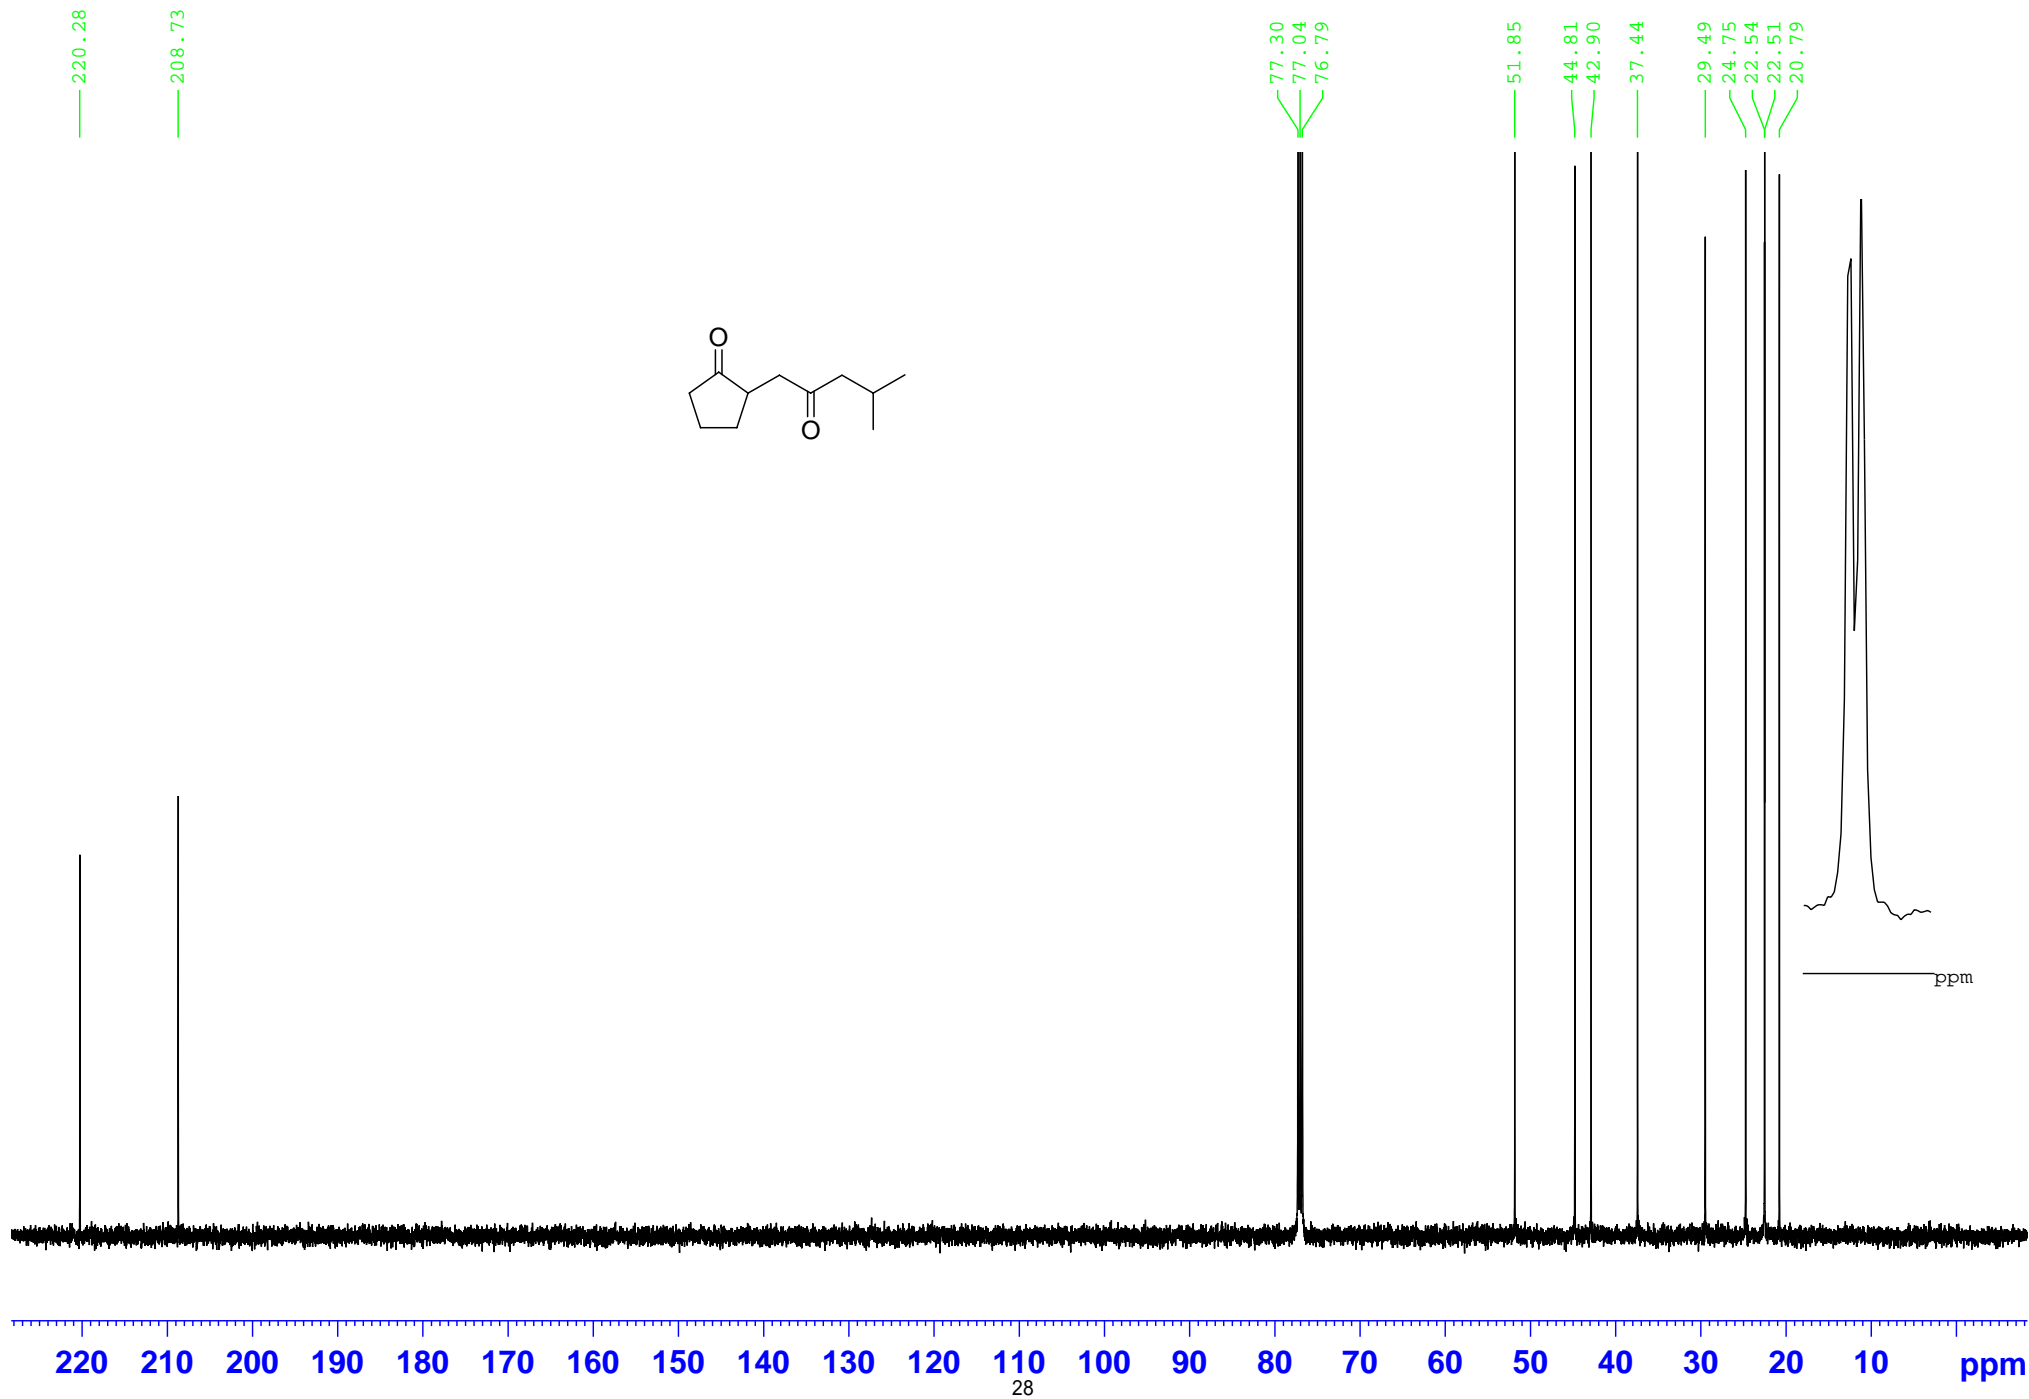

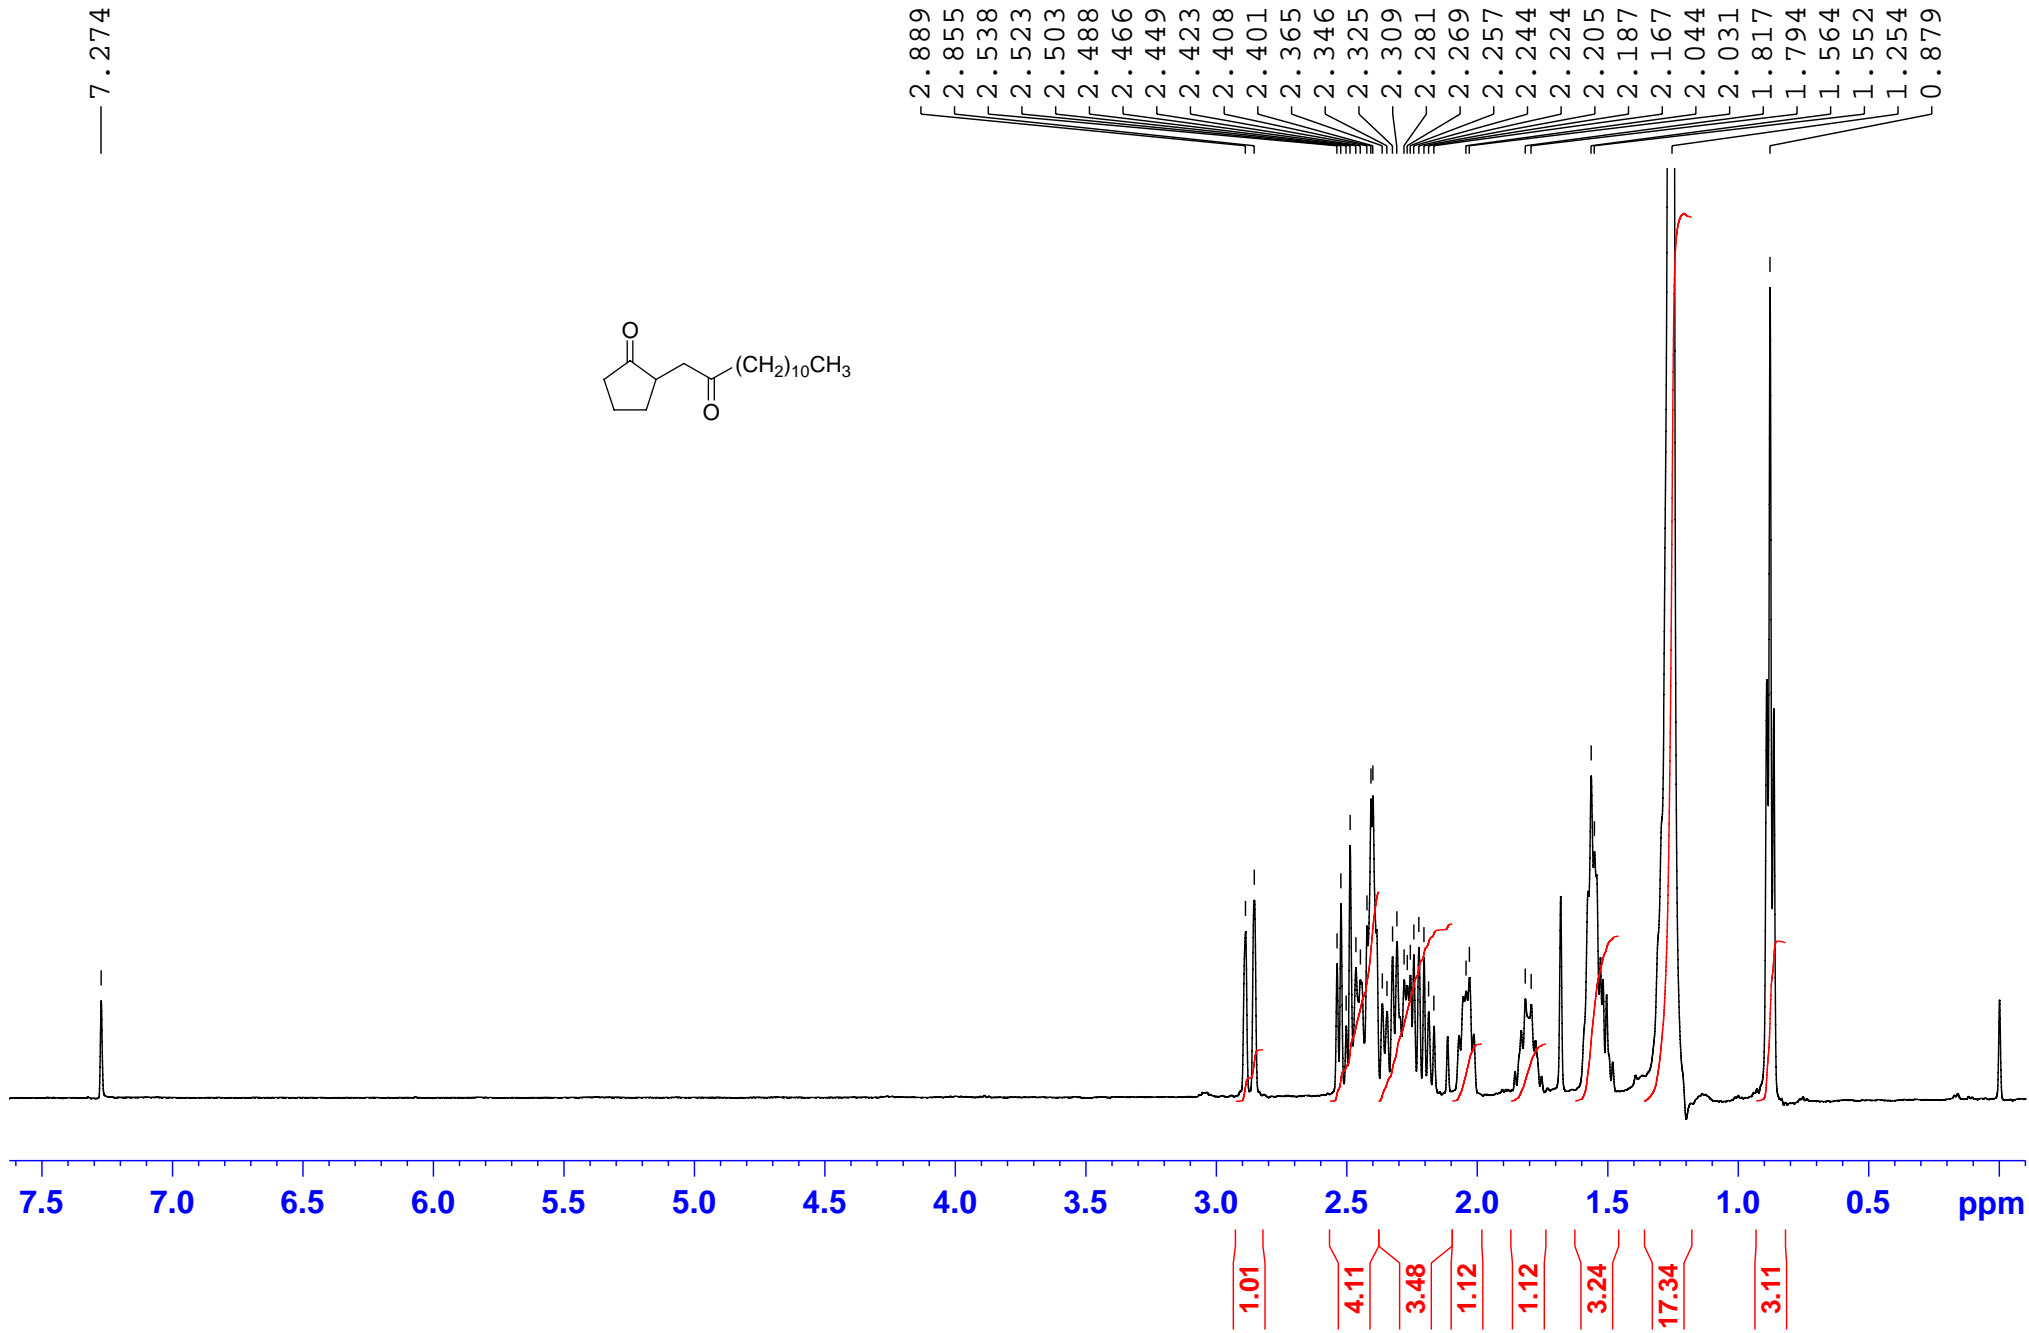

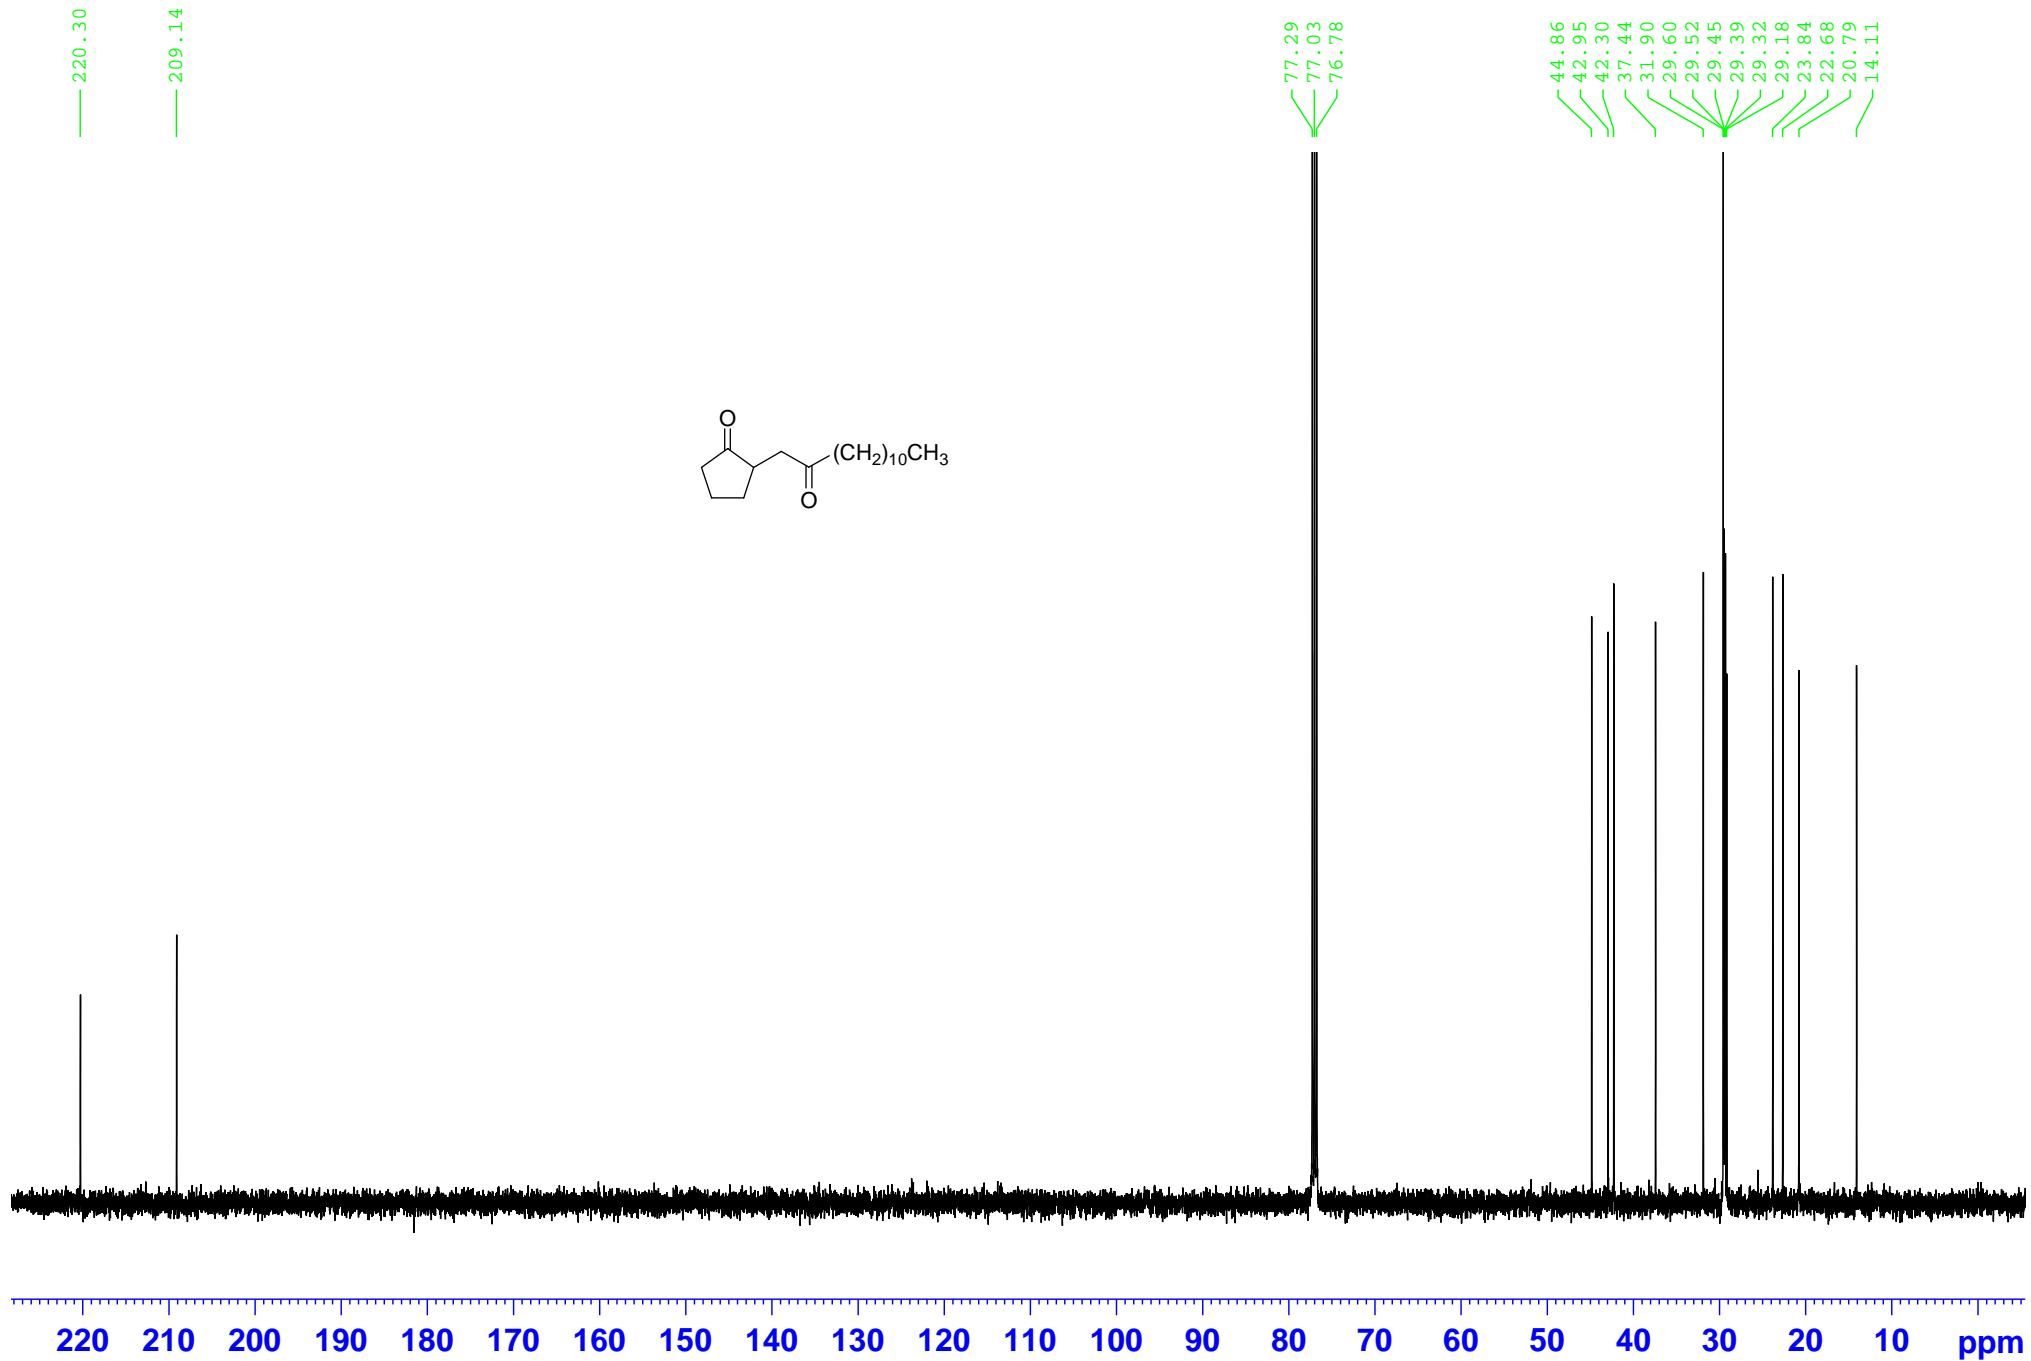

7.264  
 2.859  
 2.849  
 2.535  
 2.439  
 2.405  
 2.400  
 2.372  
 2.370  
 2.363  
 2.358  
 2.338  
 2.322  
 2.317  
 2.313  
 2.309  
 2.296  
 2.292  
 2.213  
 2.208  
 2.198  
 2.192  
 2.187  
 2.183  
 2.178  
 2.166  
 2.160  
 2.137  
 2.119  
 2.114  
 2.097  
 2.091  
 2.083  
 2.073  
 2.065  
 2.058  
 2.048  
 2.043  
 2.037  
 2.033  
 2.021  
 2.016  
 2.012  
 1.901  
 1.893  
 1.886  
 1.882  
 1.878  
 1.862  
 1.853  
 1.714  
 1.693  
 1.685  
 1.665  
 1.652  
 1.636  
 1.622  
 1.606  
 -0.000

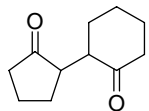

The upper isomer

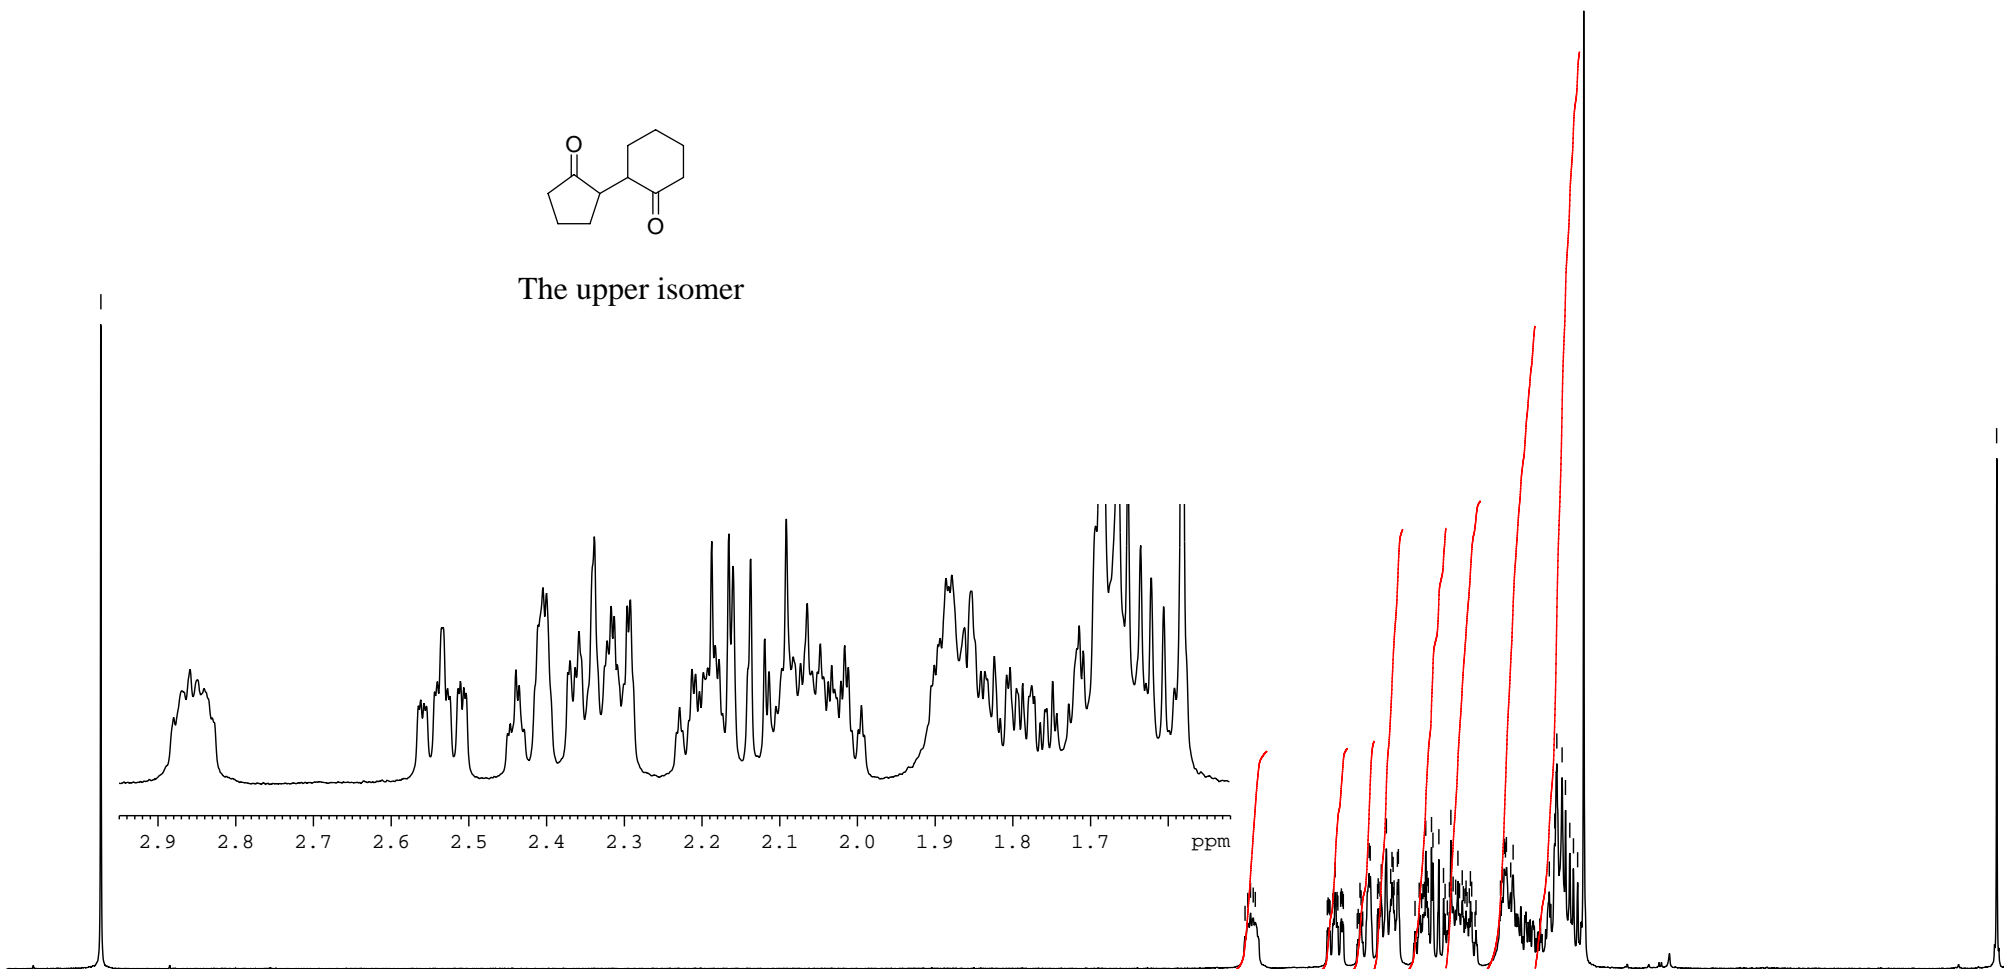

7.5  
 7.0  
 6.5  
 6.0  
 5.5  
 5.0  
 4.5  
 4.0  
 3.5  
 3.0  
 2.5  
 2.0  
 1.5  
 1.0  
 0.5  
 ppm

1.00  
 1.01  
 1.05  
 2.01  
 2.02  
 2.14  
 2.94  
 4.20

220.71  
211.07

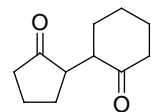

The upper isomer

77.34  
77.02  
76.71

50.56  
48.75  
42.02  
38.41

30.38  
27.48  
26.29  
25.31  
20.92

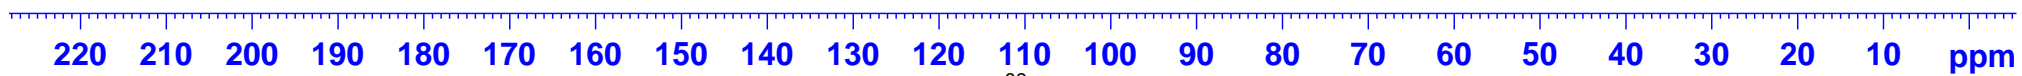



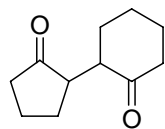

the upper isomer

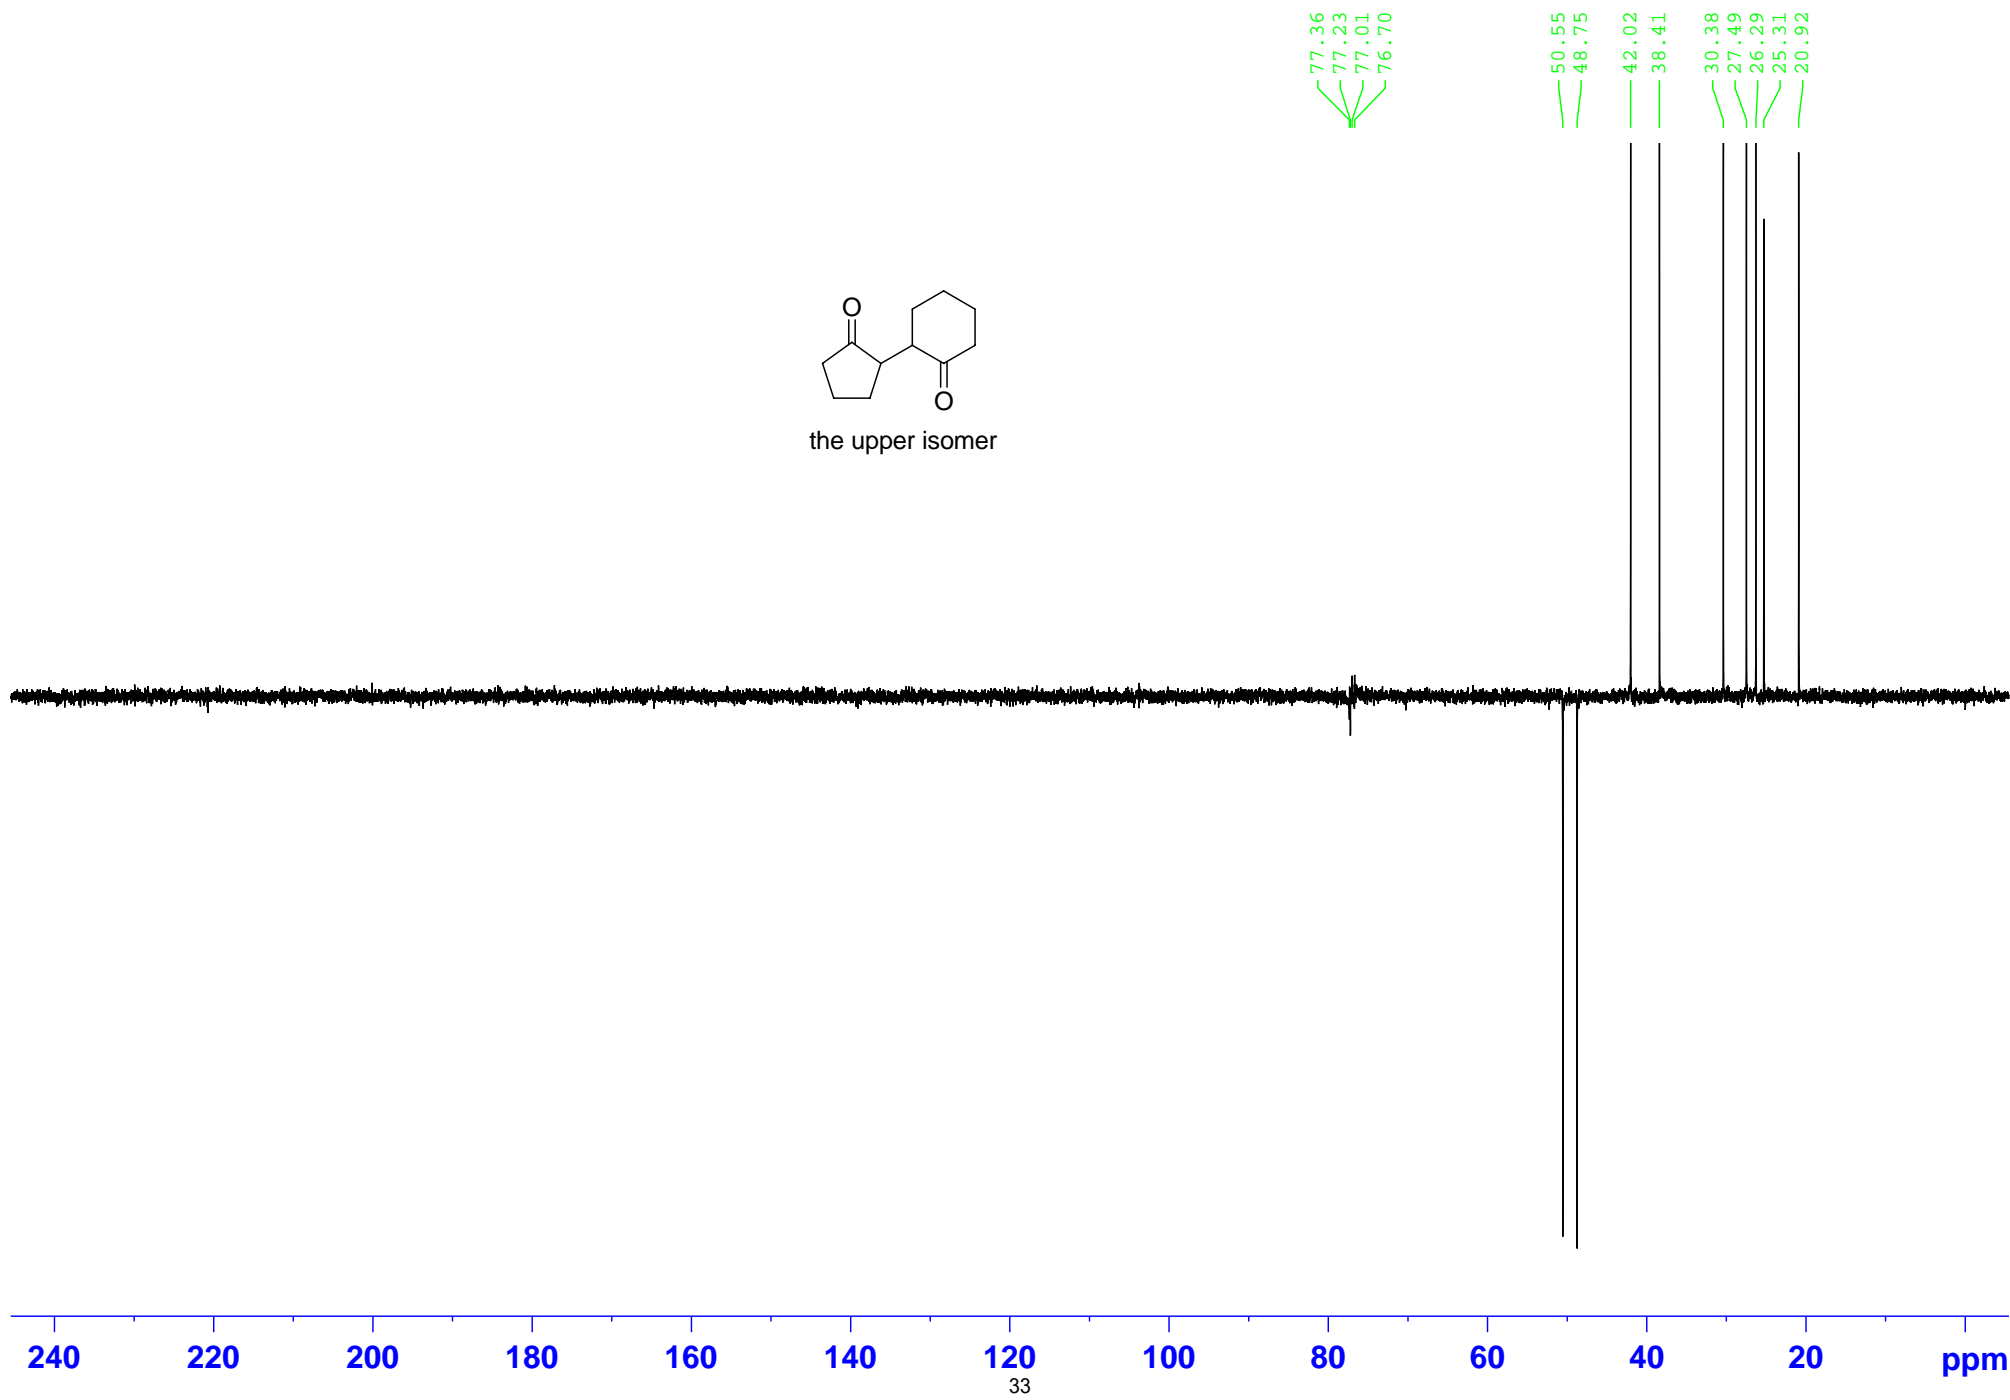

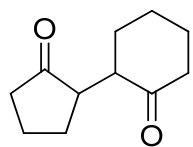

HMQC, The upper isomer

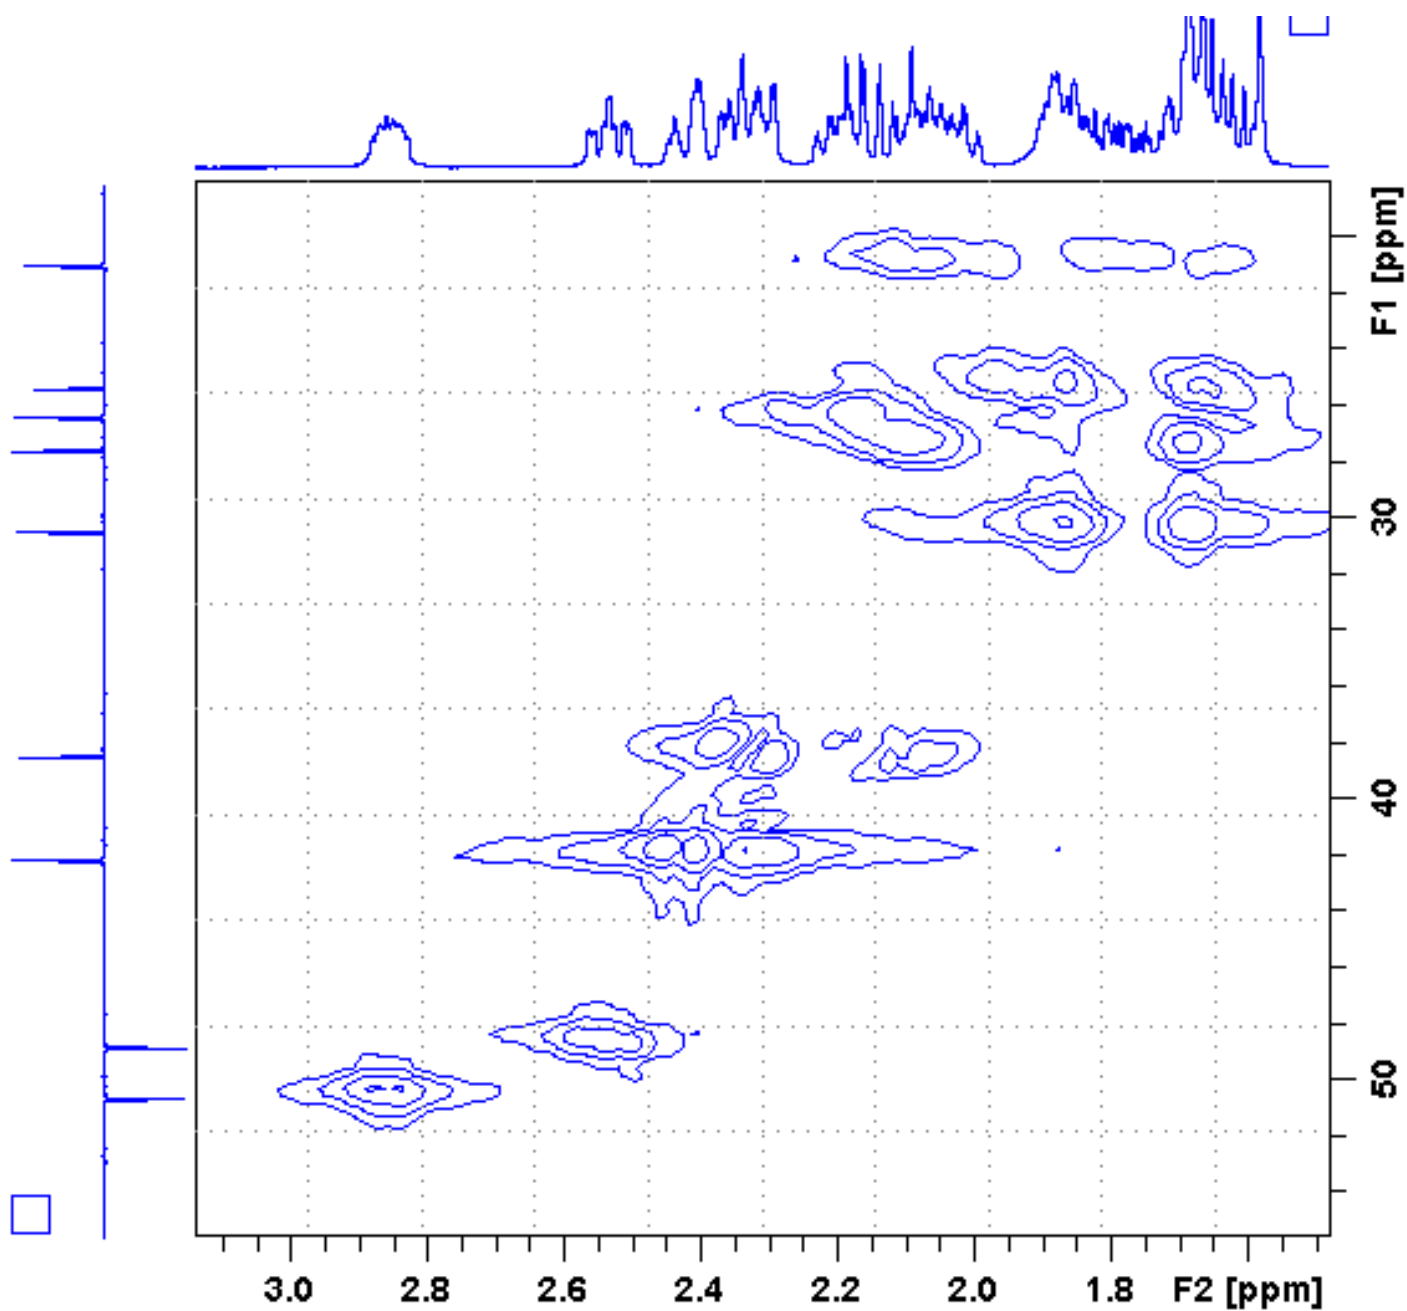

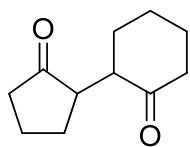

COSY; The upper isomer

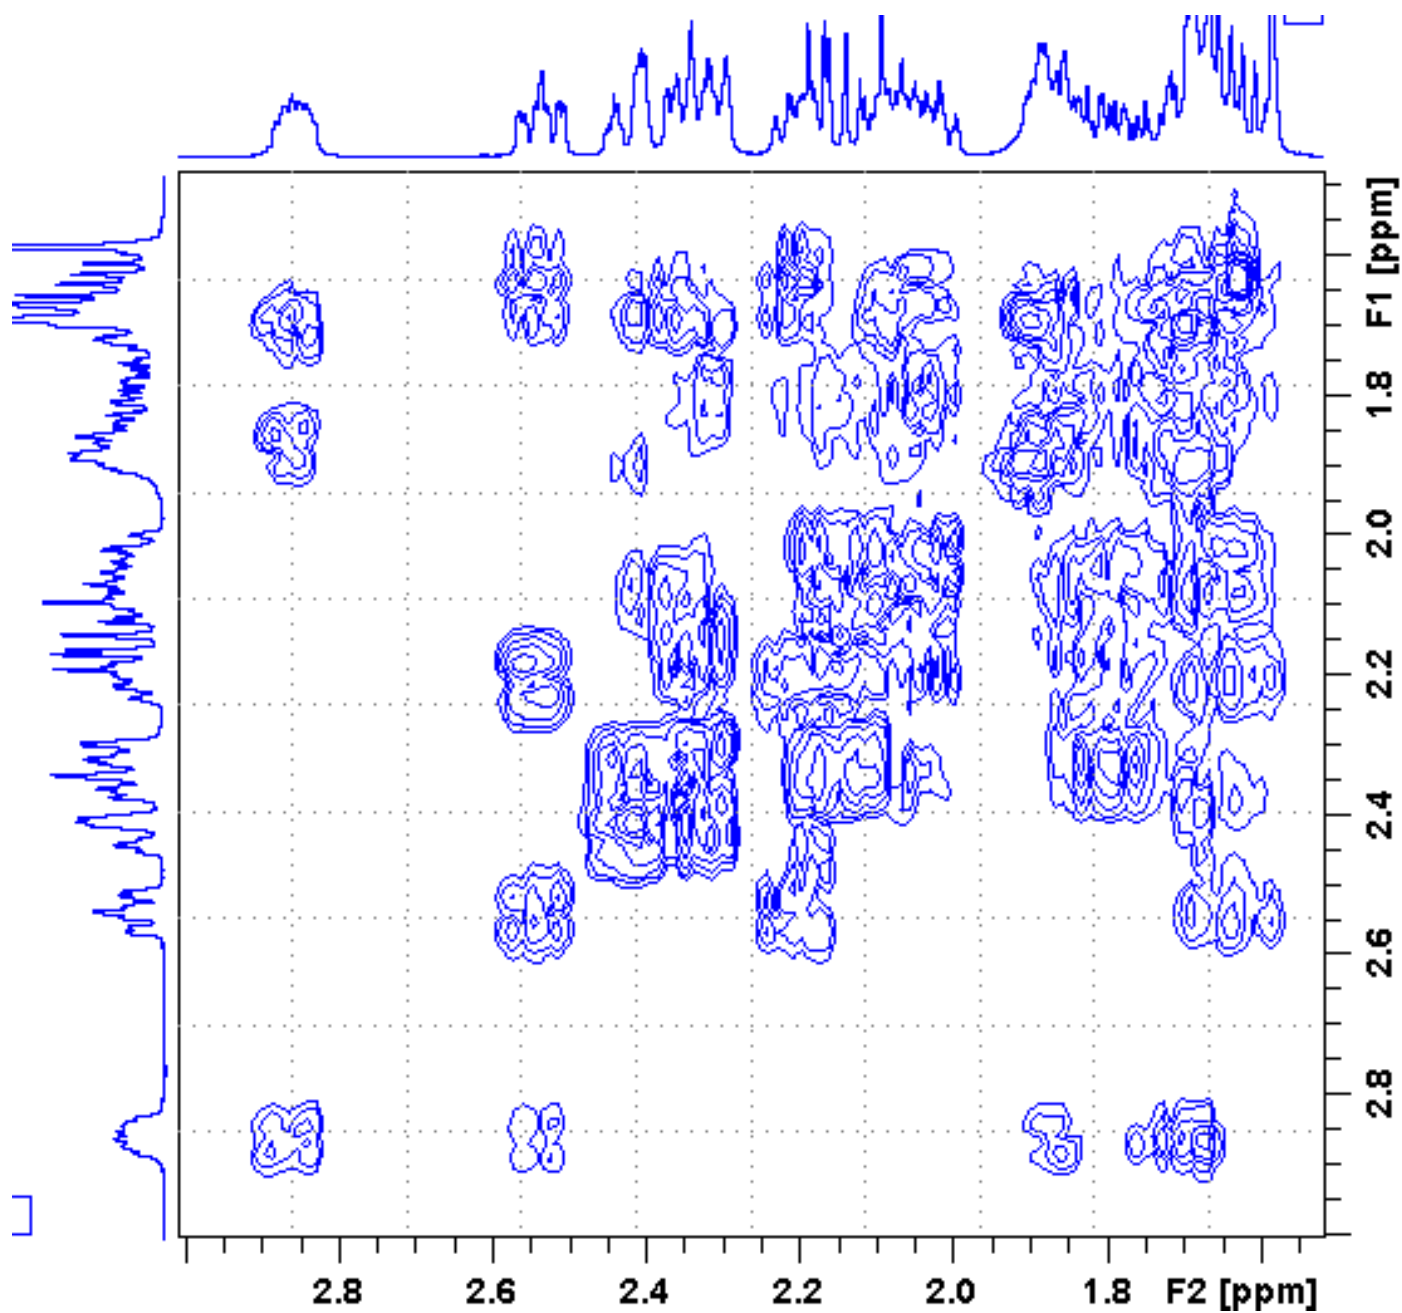

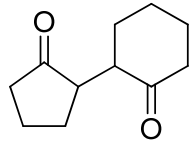

HMBC; The upper isomer

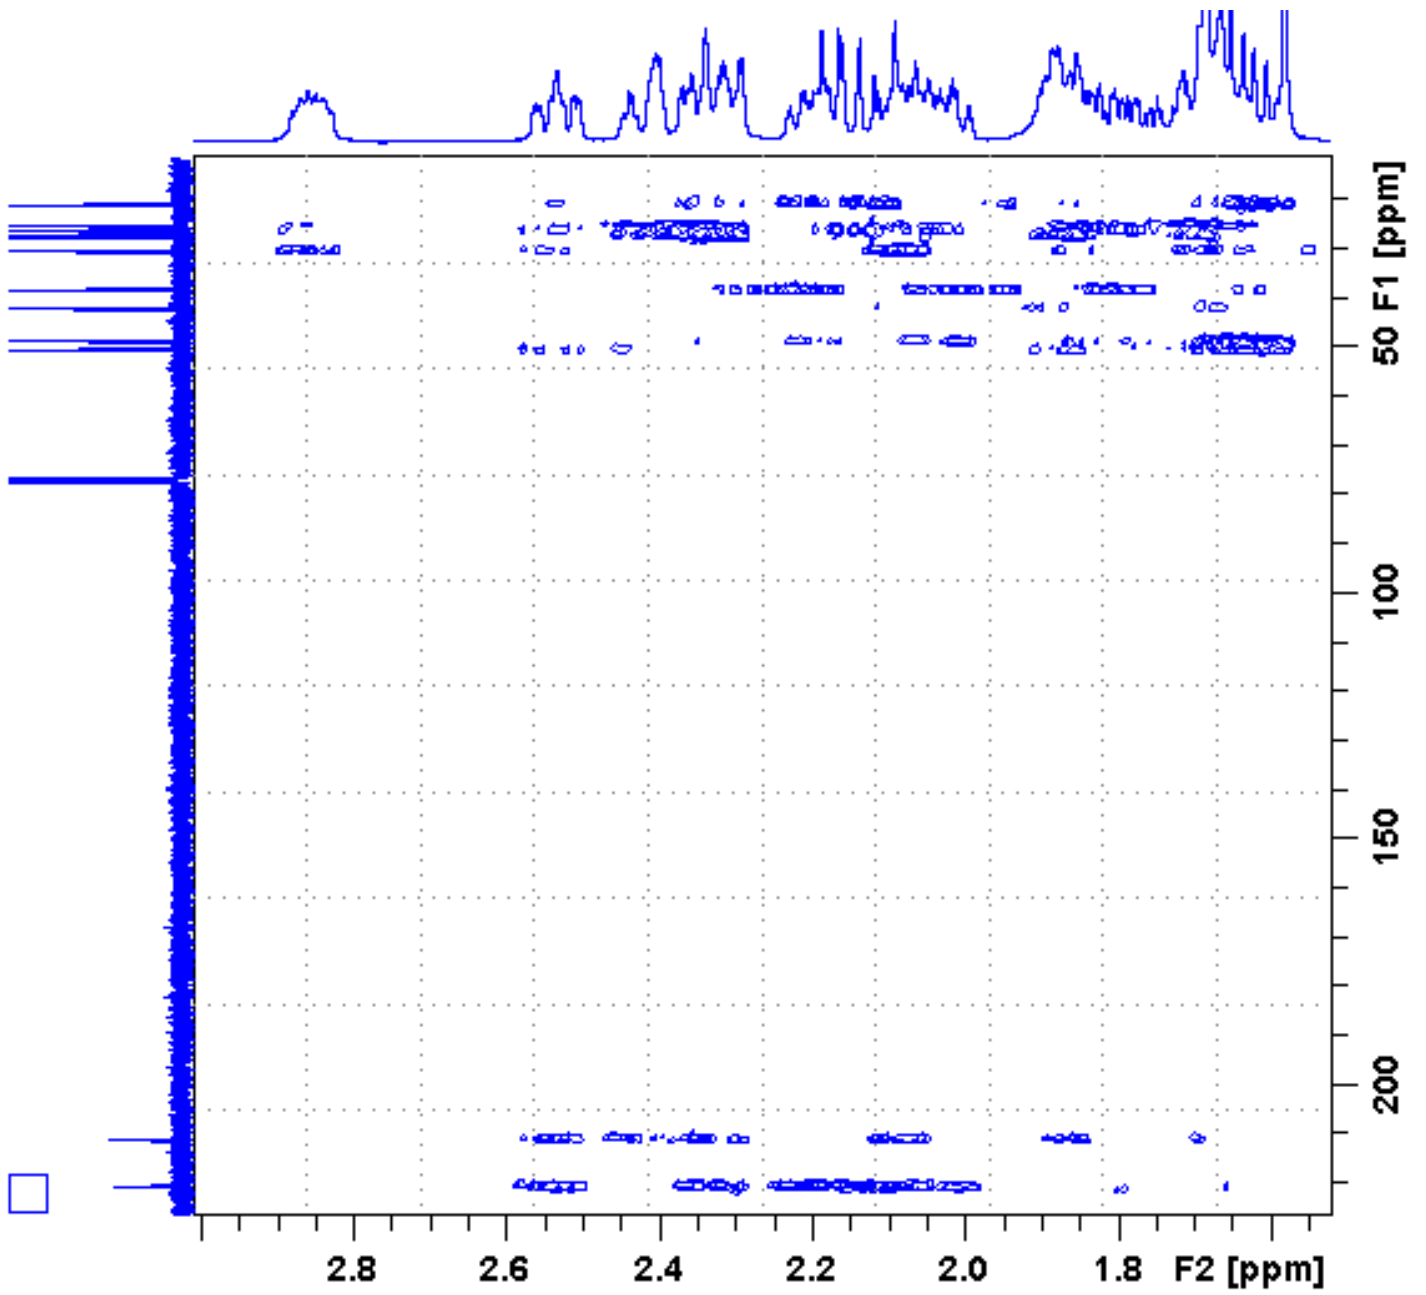

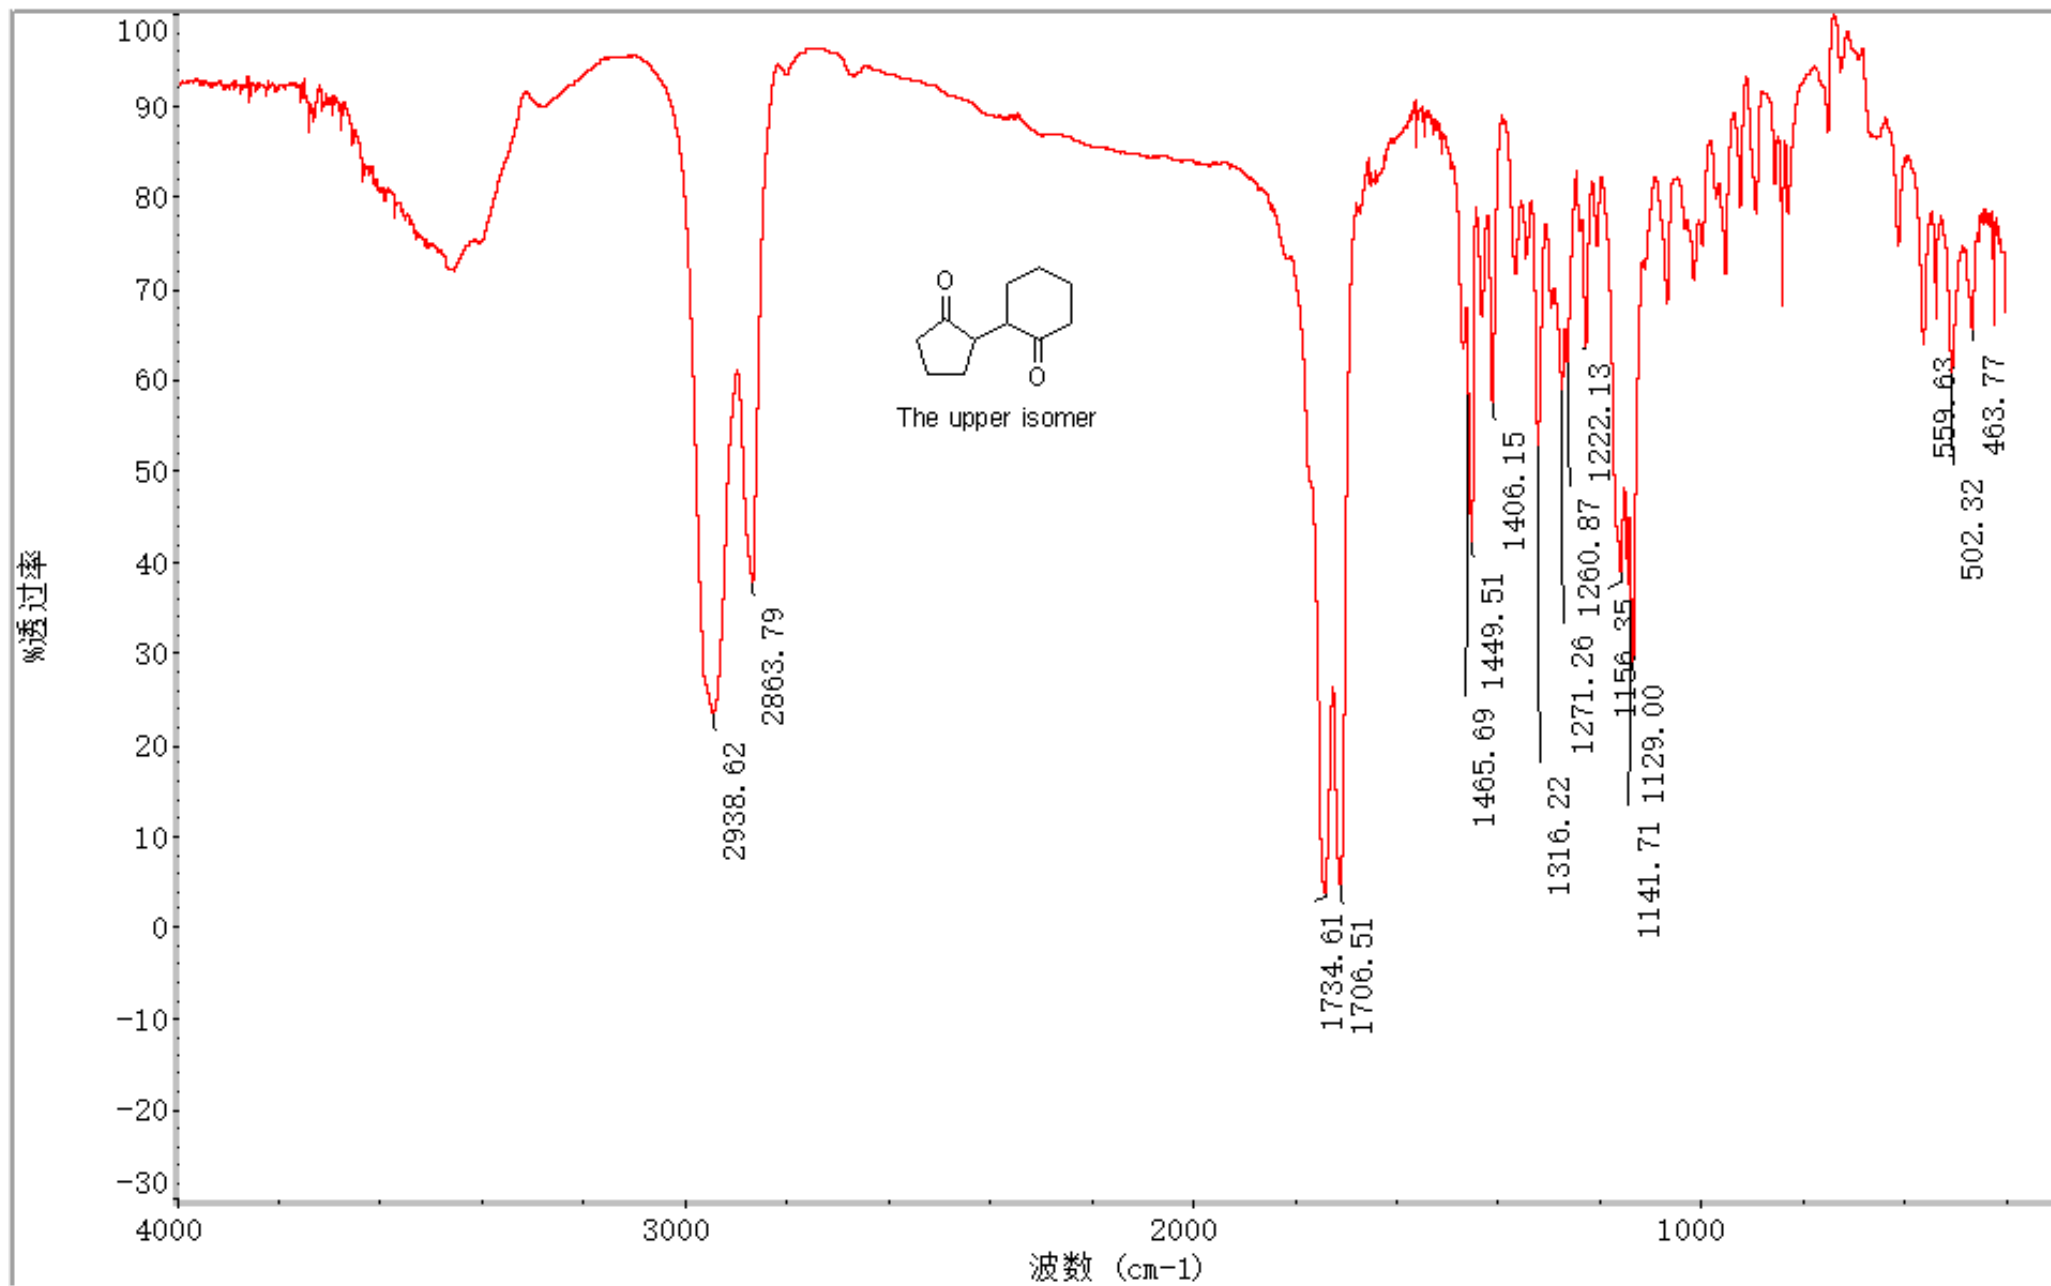

— 7.265

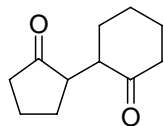

the lower isomer

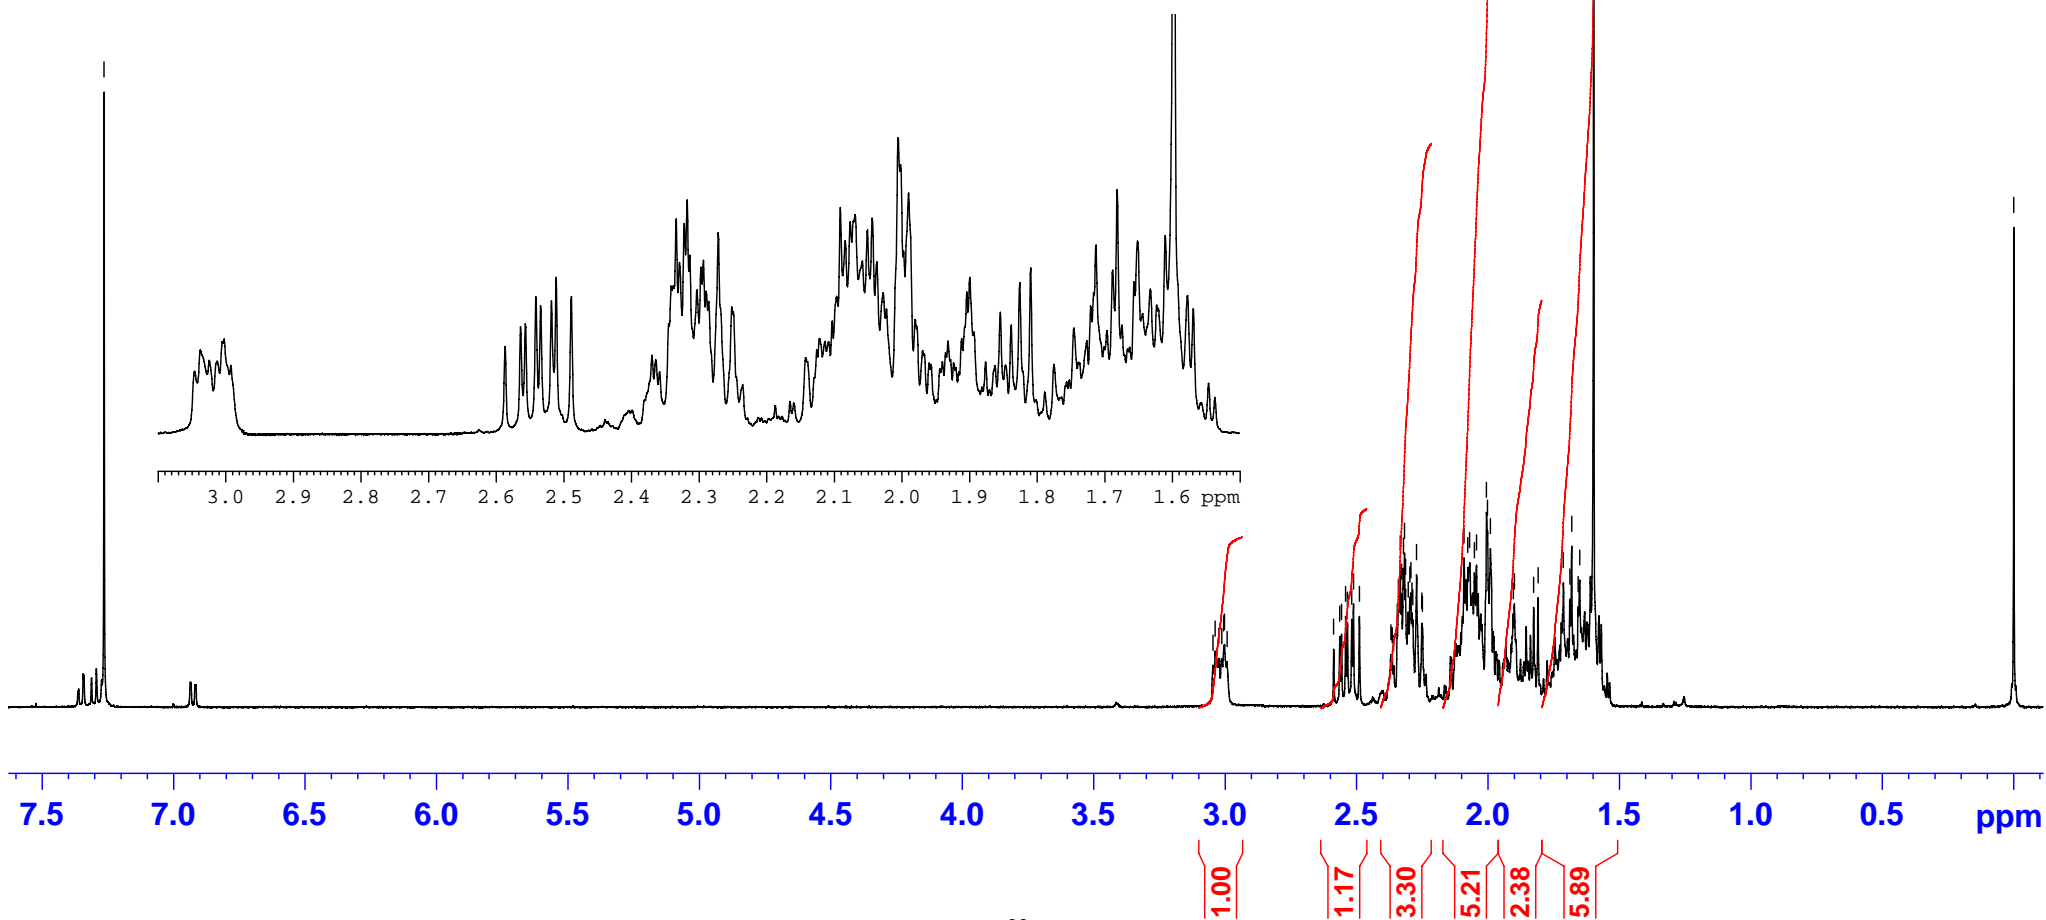

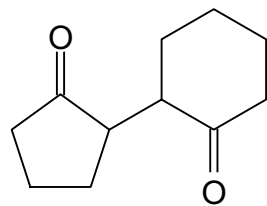

the lower isomer

—220.36

—210.01

77.42  
77.10  
76.78

51.27  
49.95

—38.03

—31.81

27.14

25.49

25.26

21.21

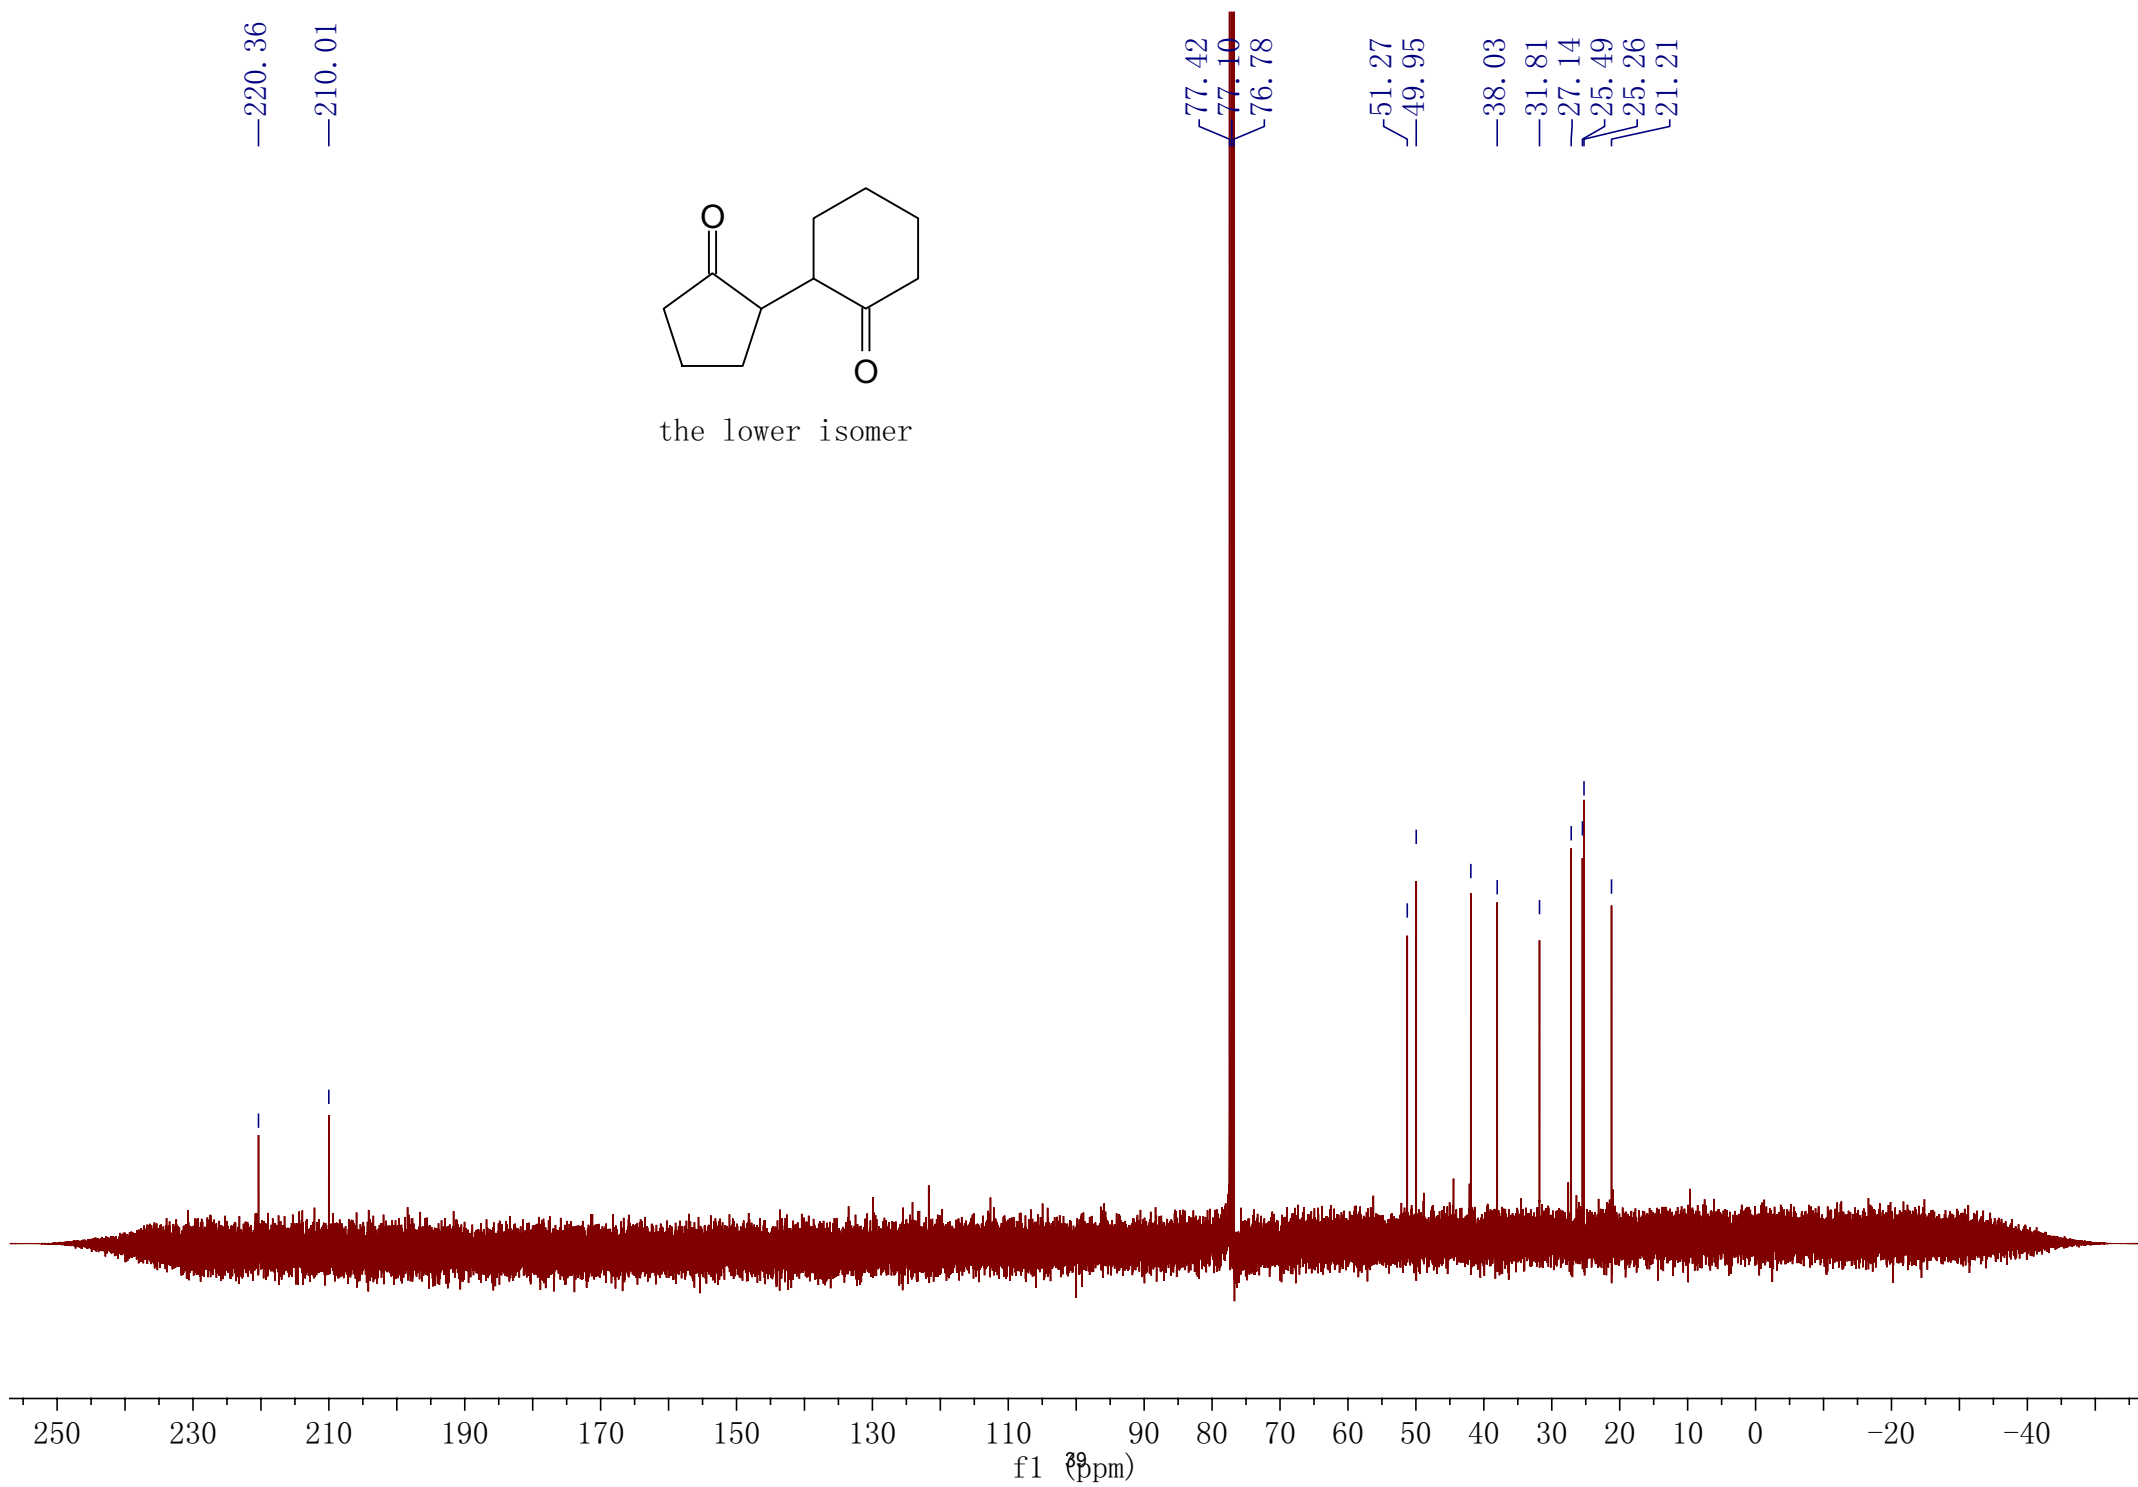

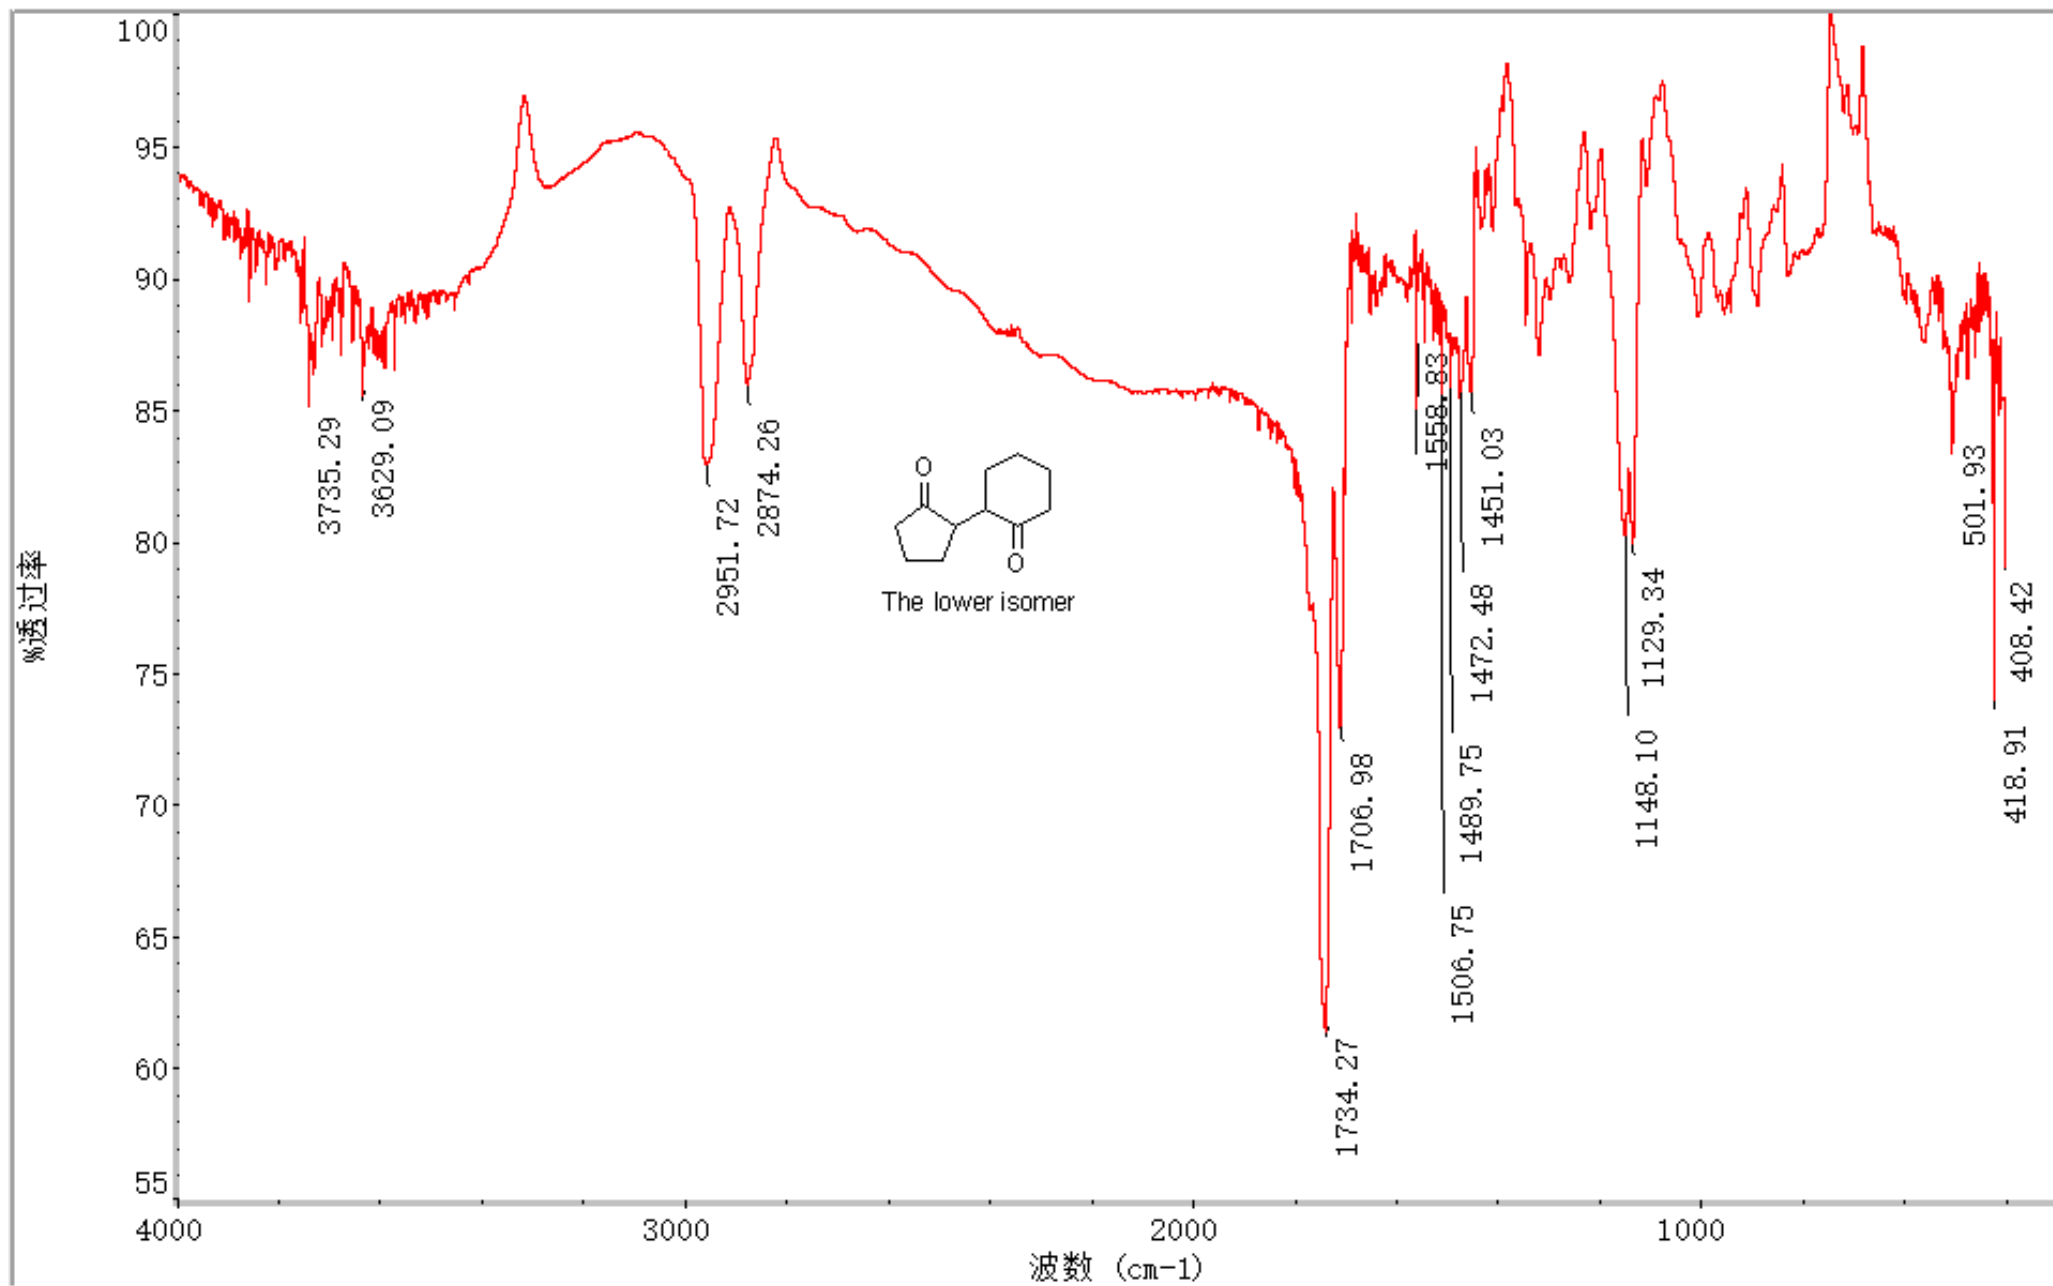



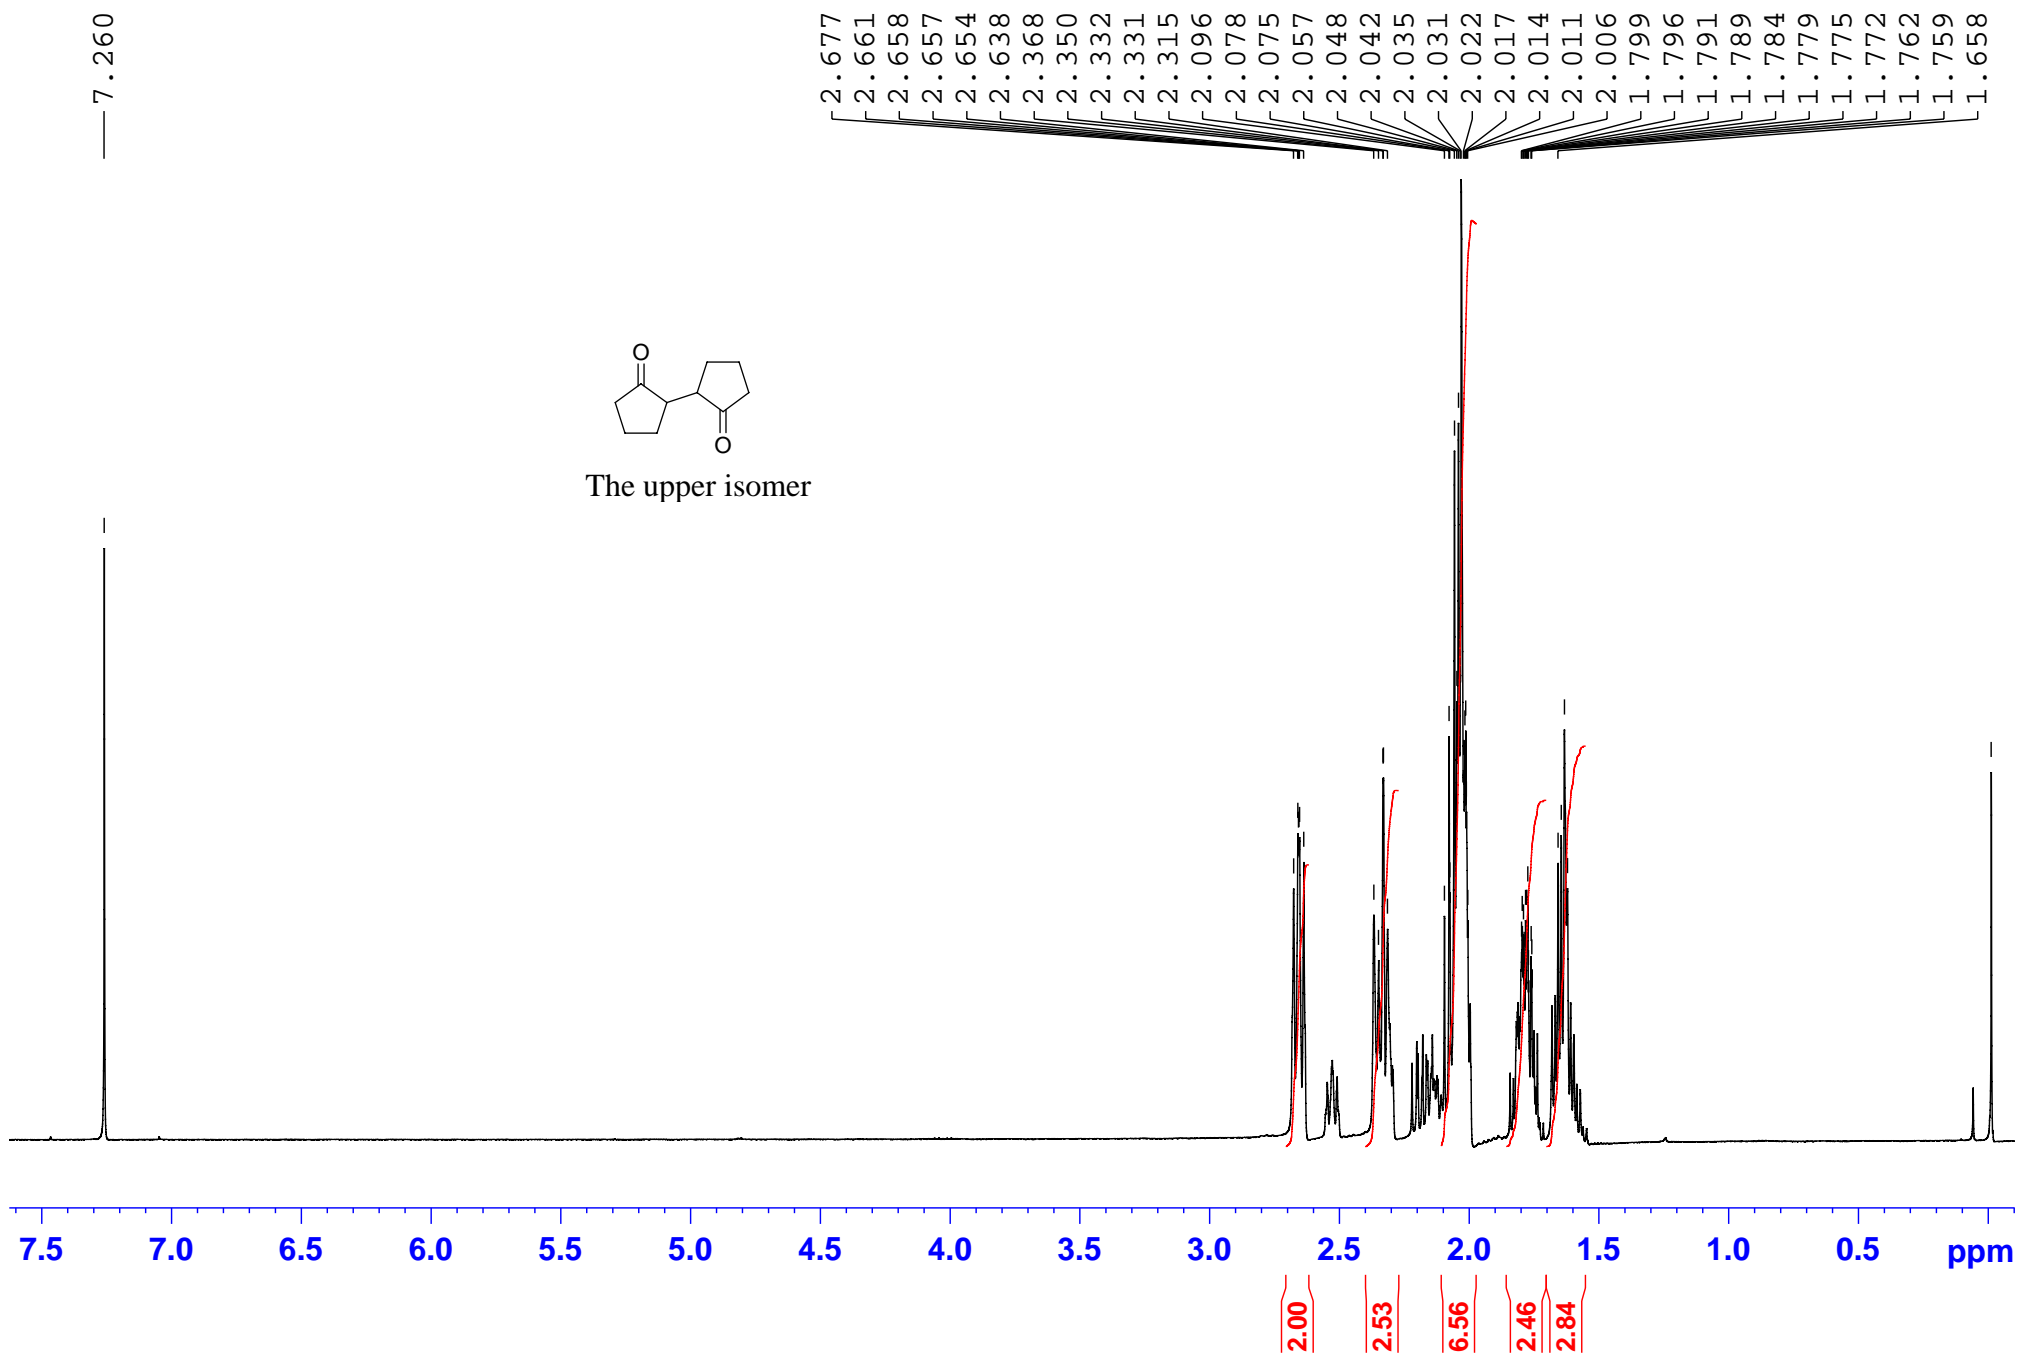

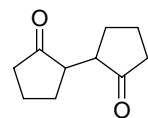

The upper isomer

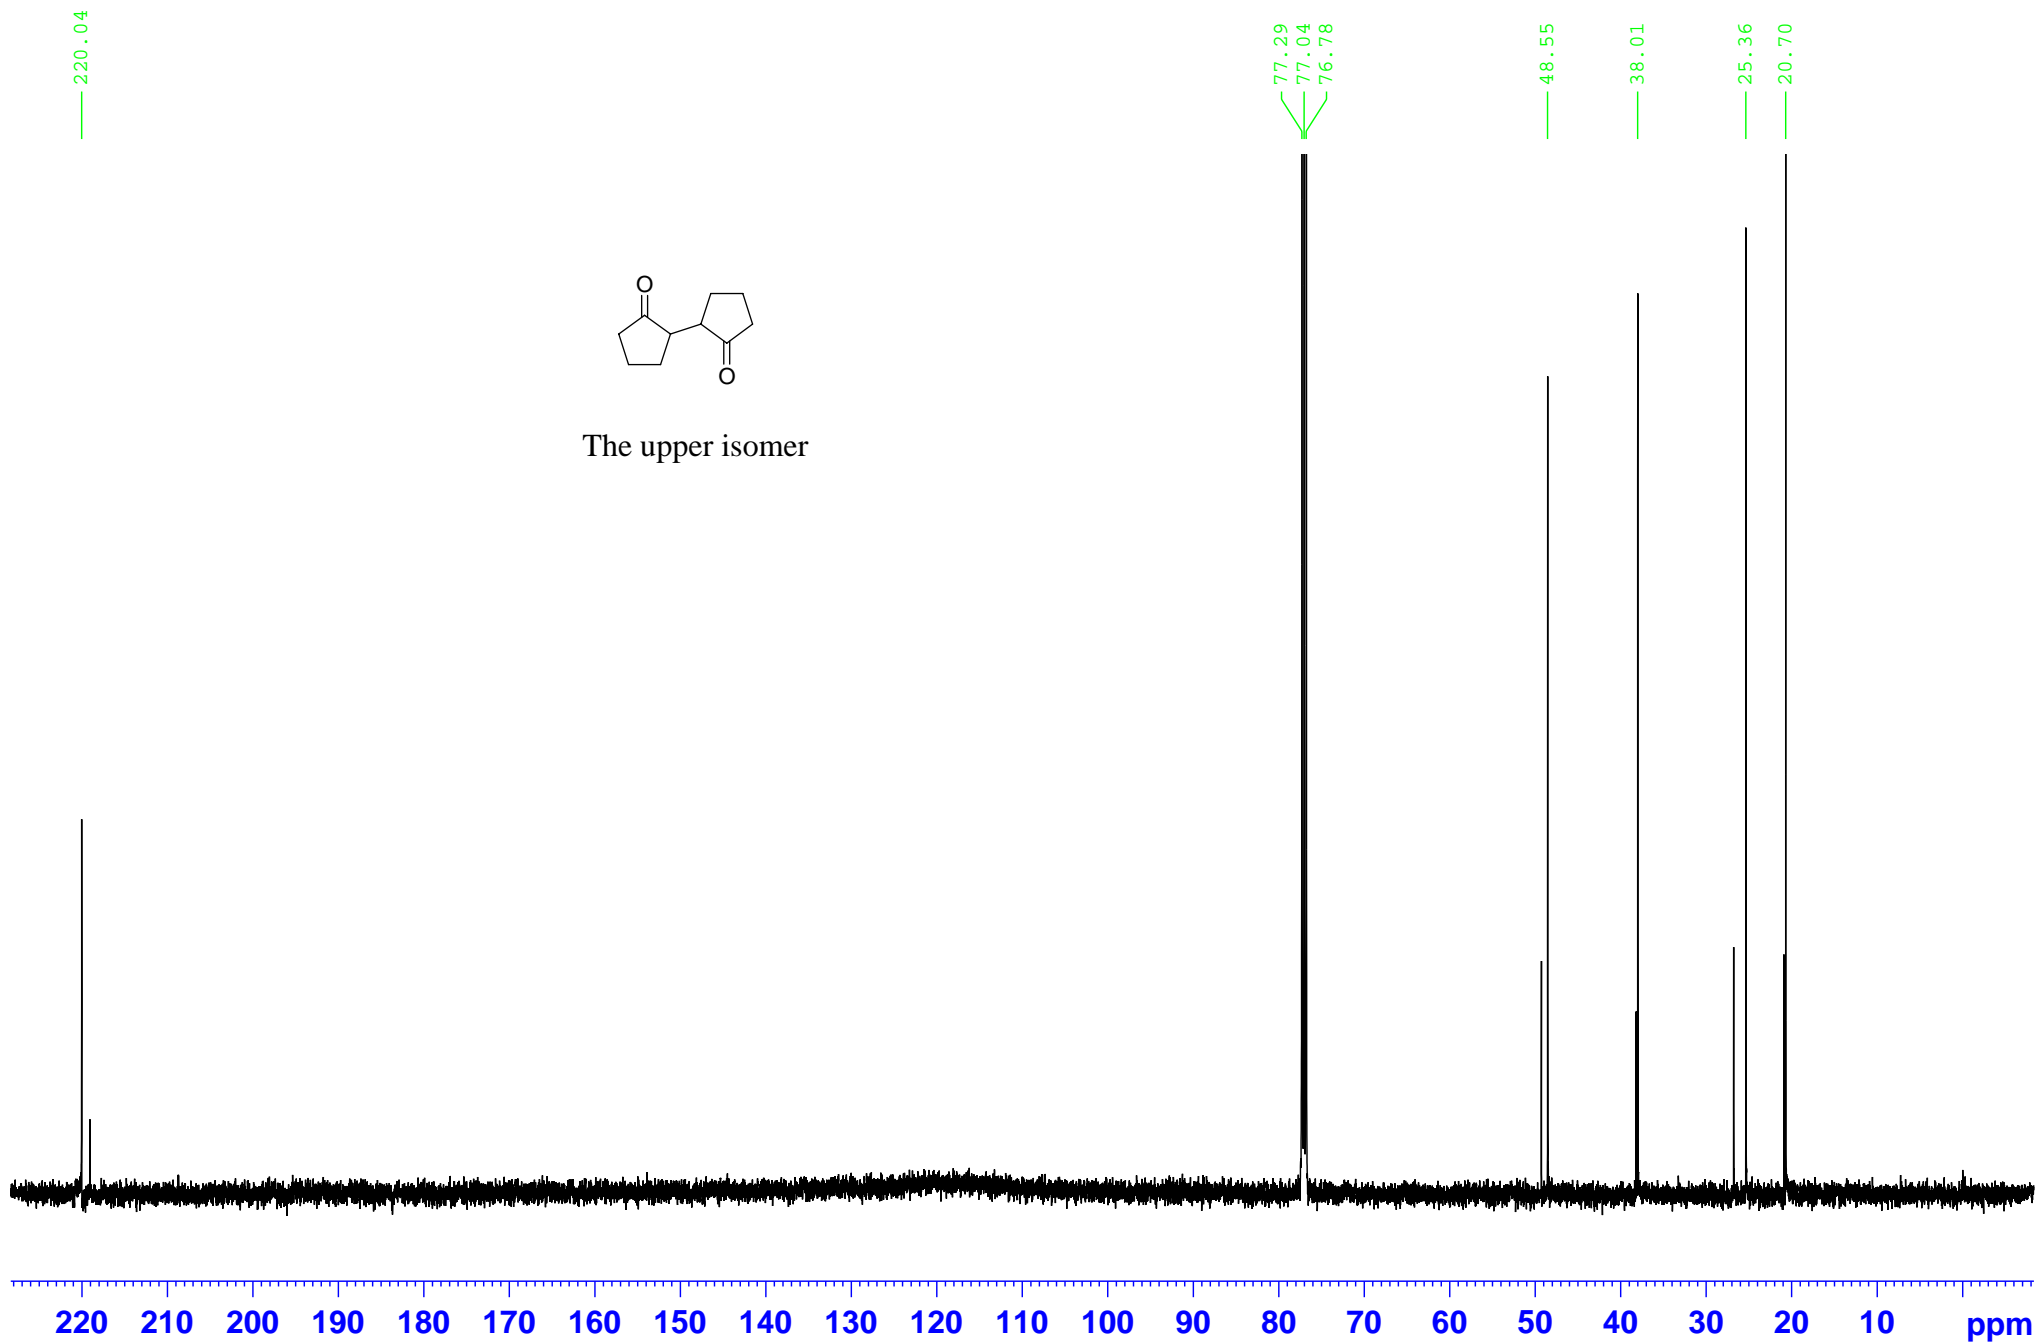

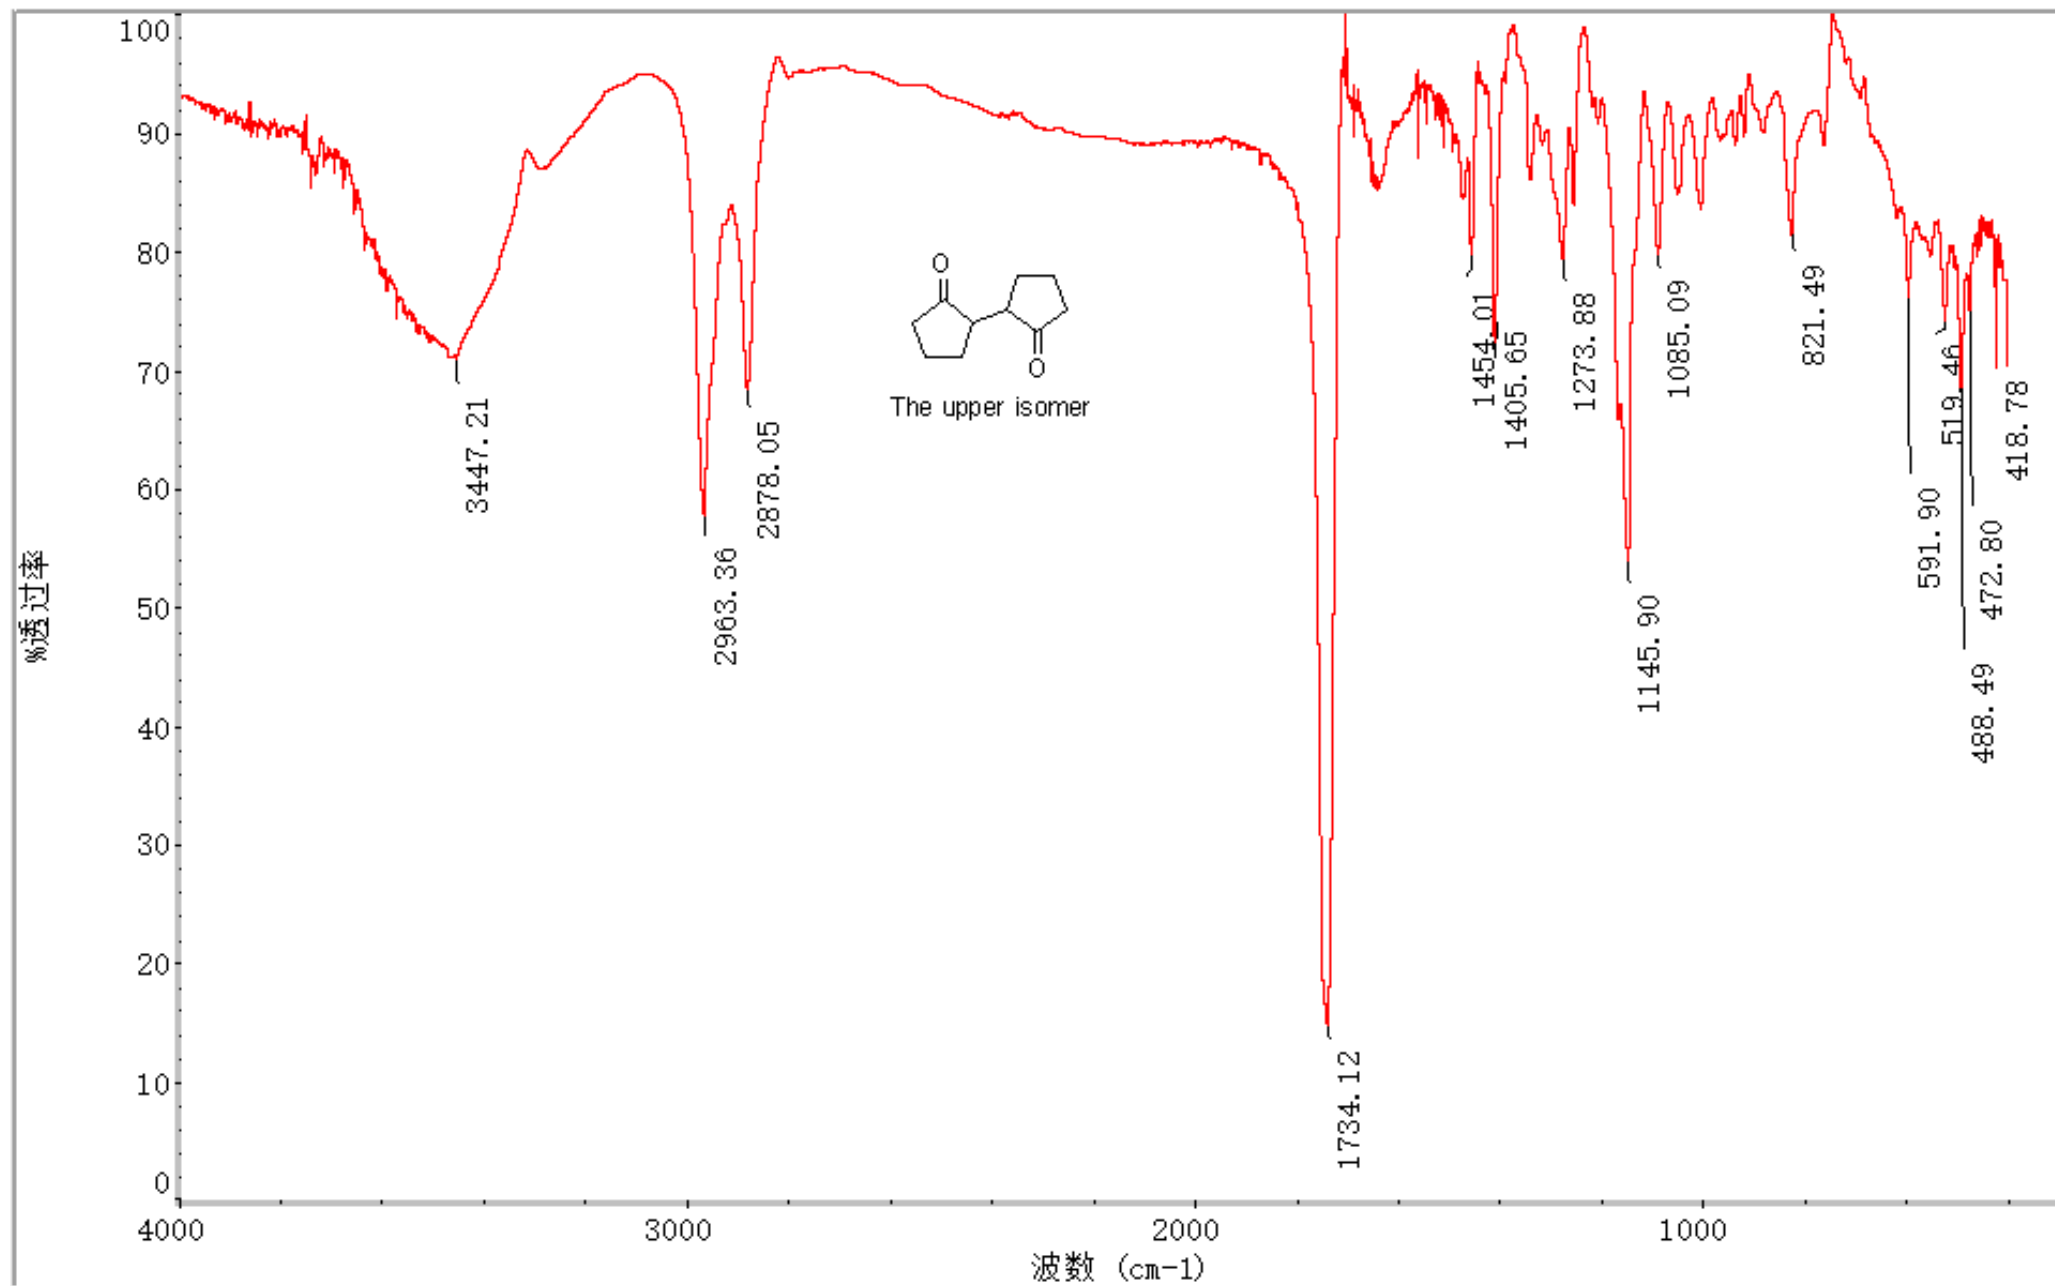

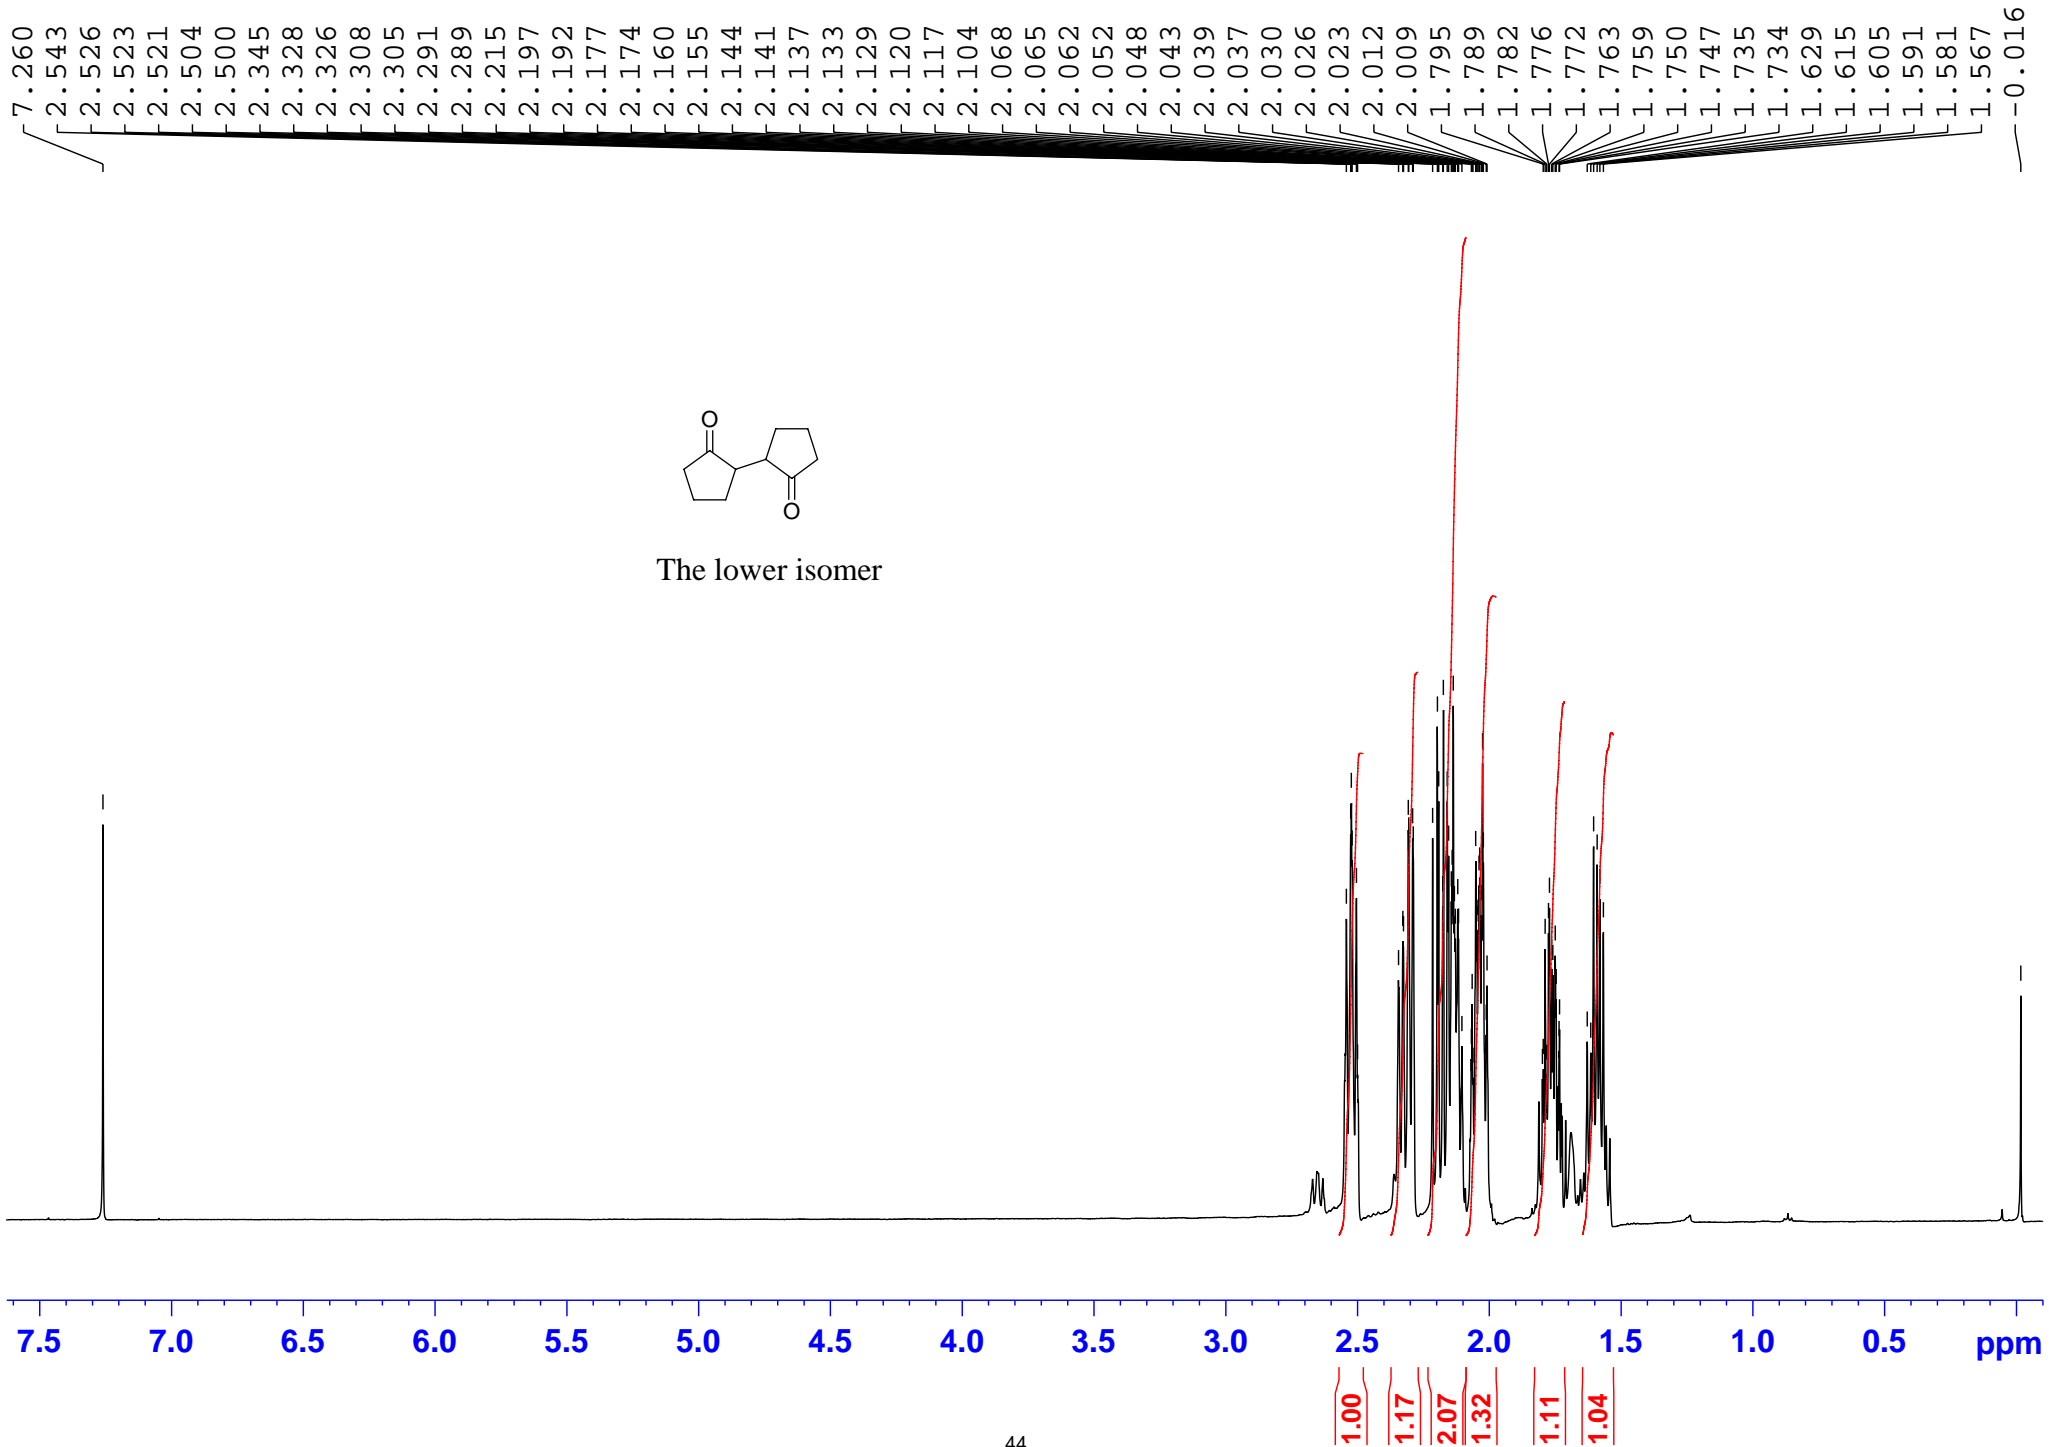

219.08

77.31  
77.05  
76.80

49.28

38.20

26.79

20.90

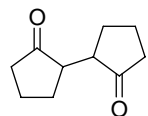

The lower isomer

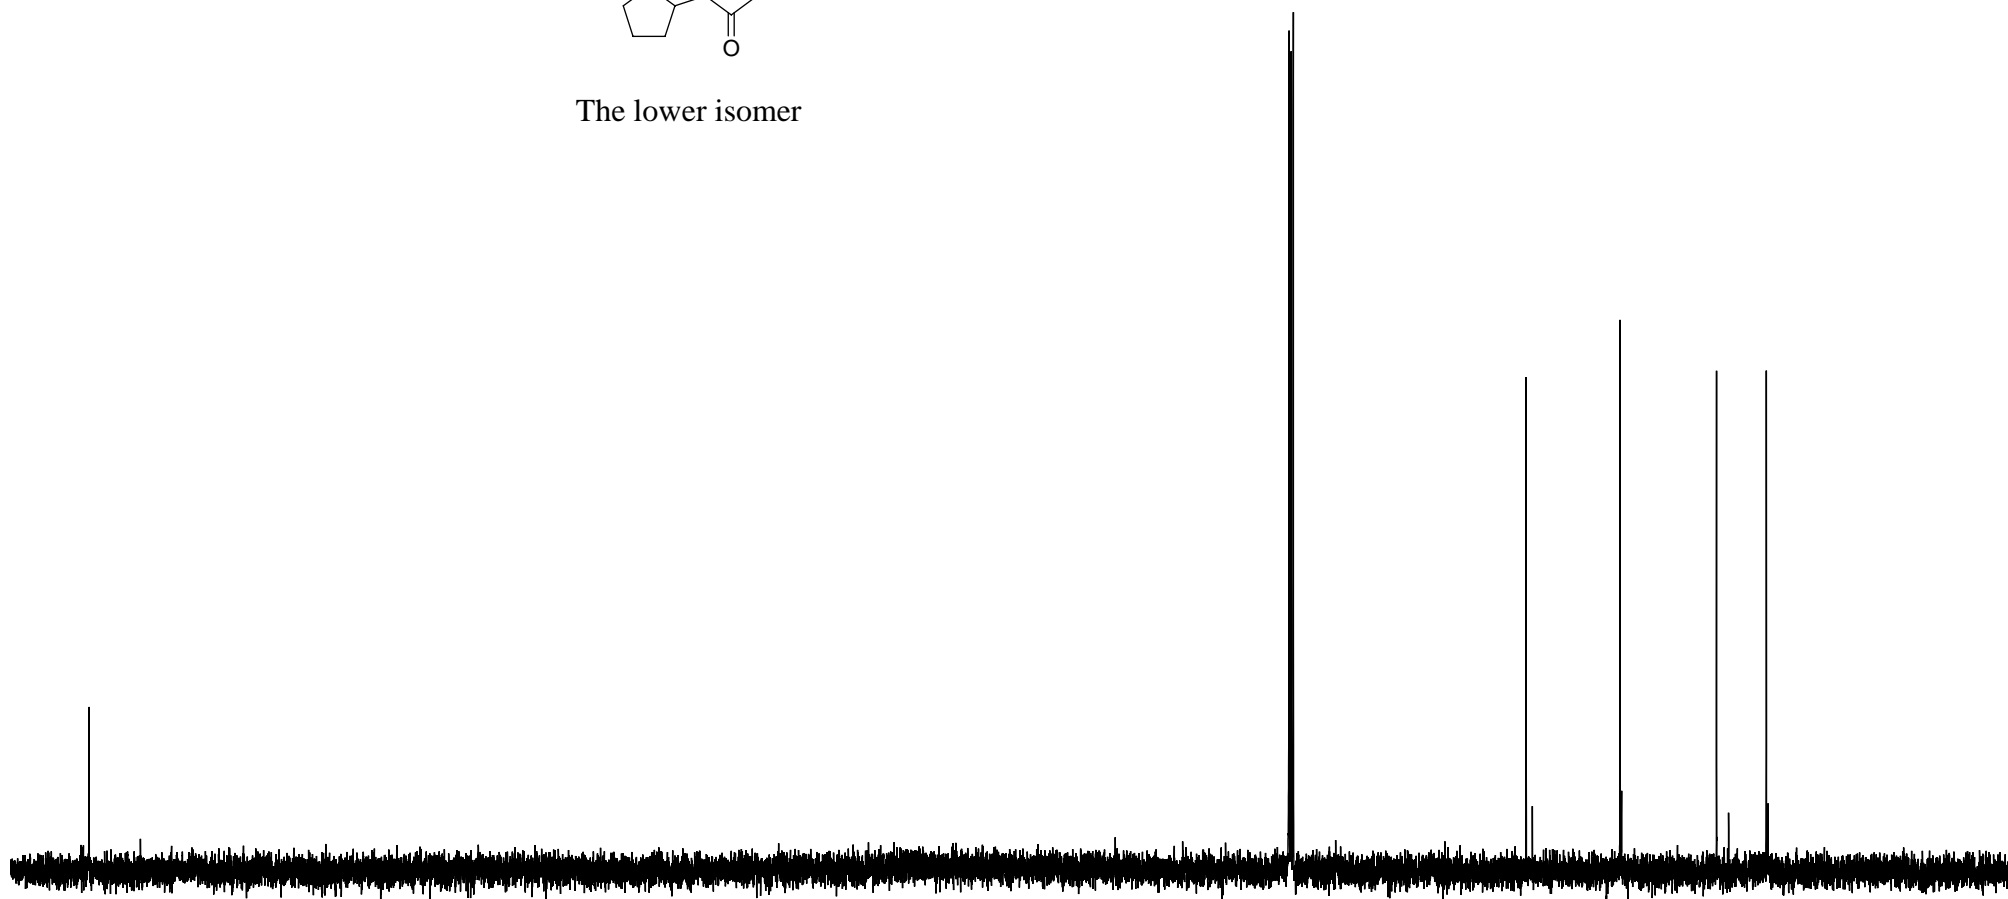

220 210 200 190 180 170 160 150 140 130 120 110 100 90 80 70 60 50 40 30 20 10 ppm

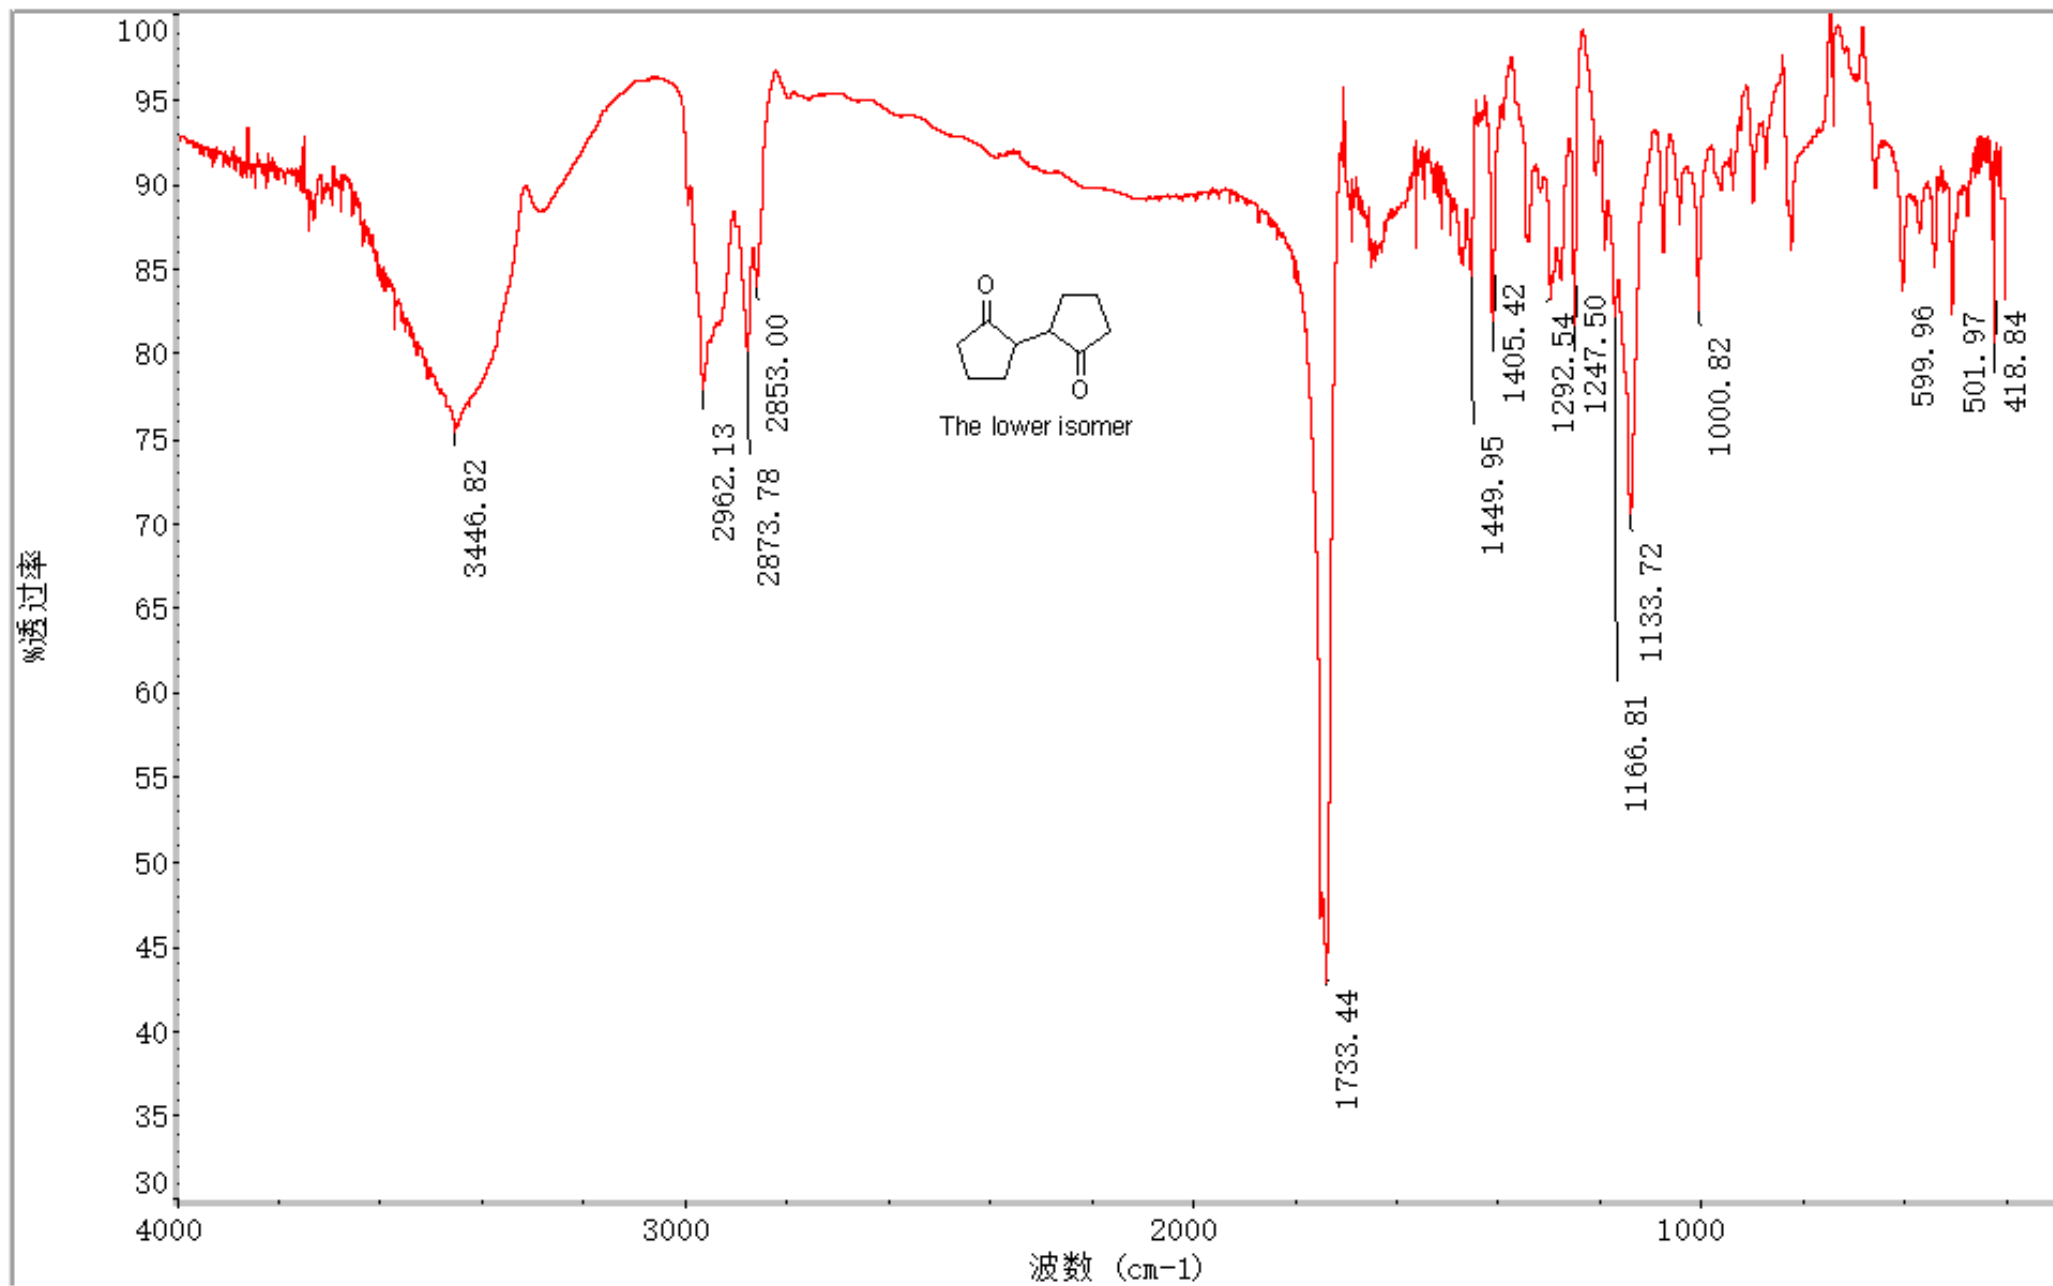

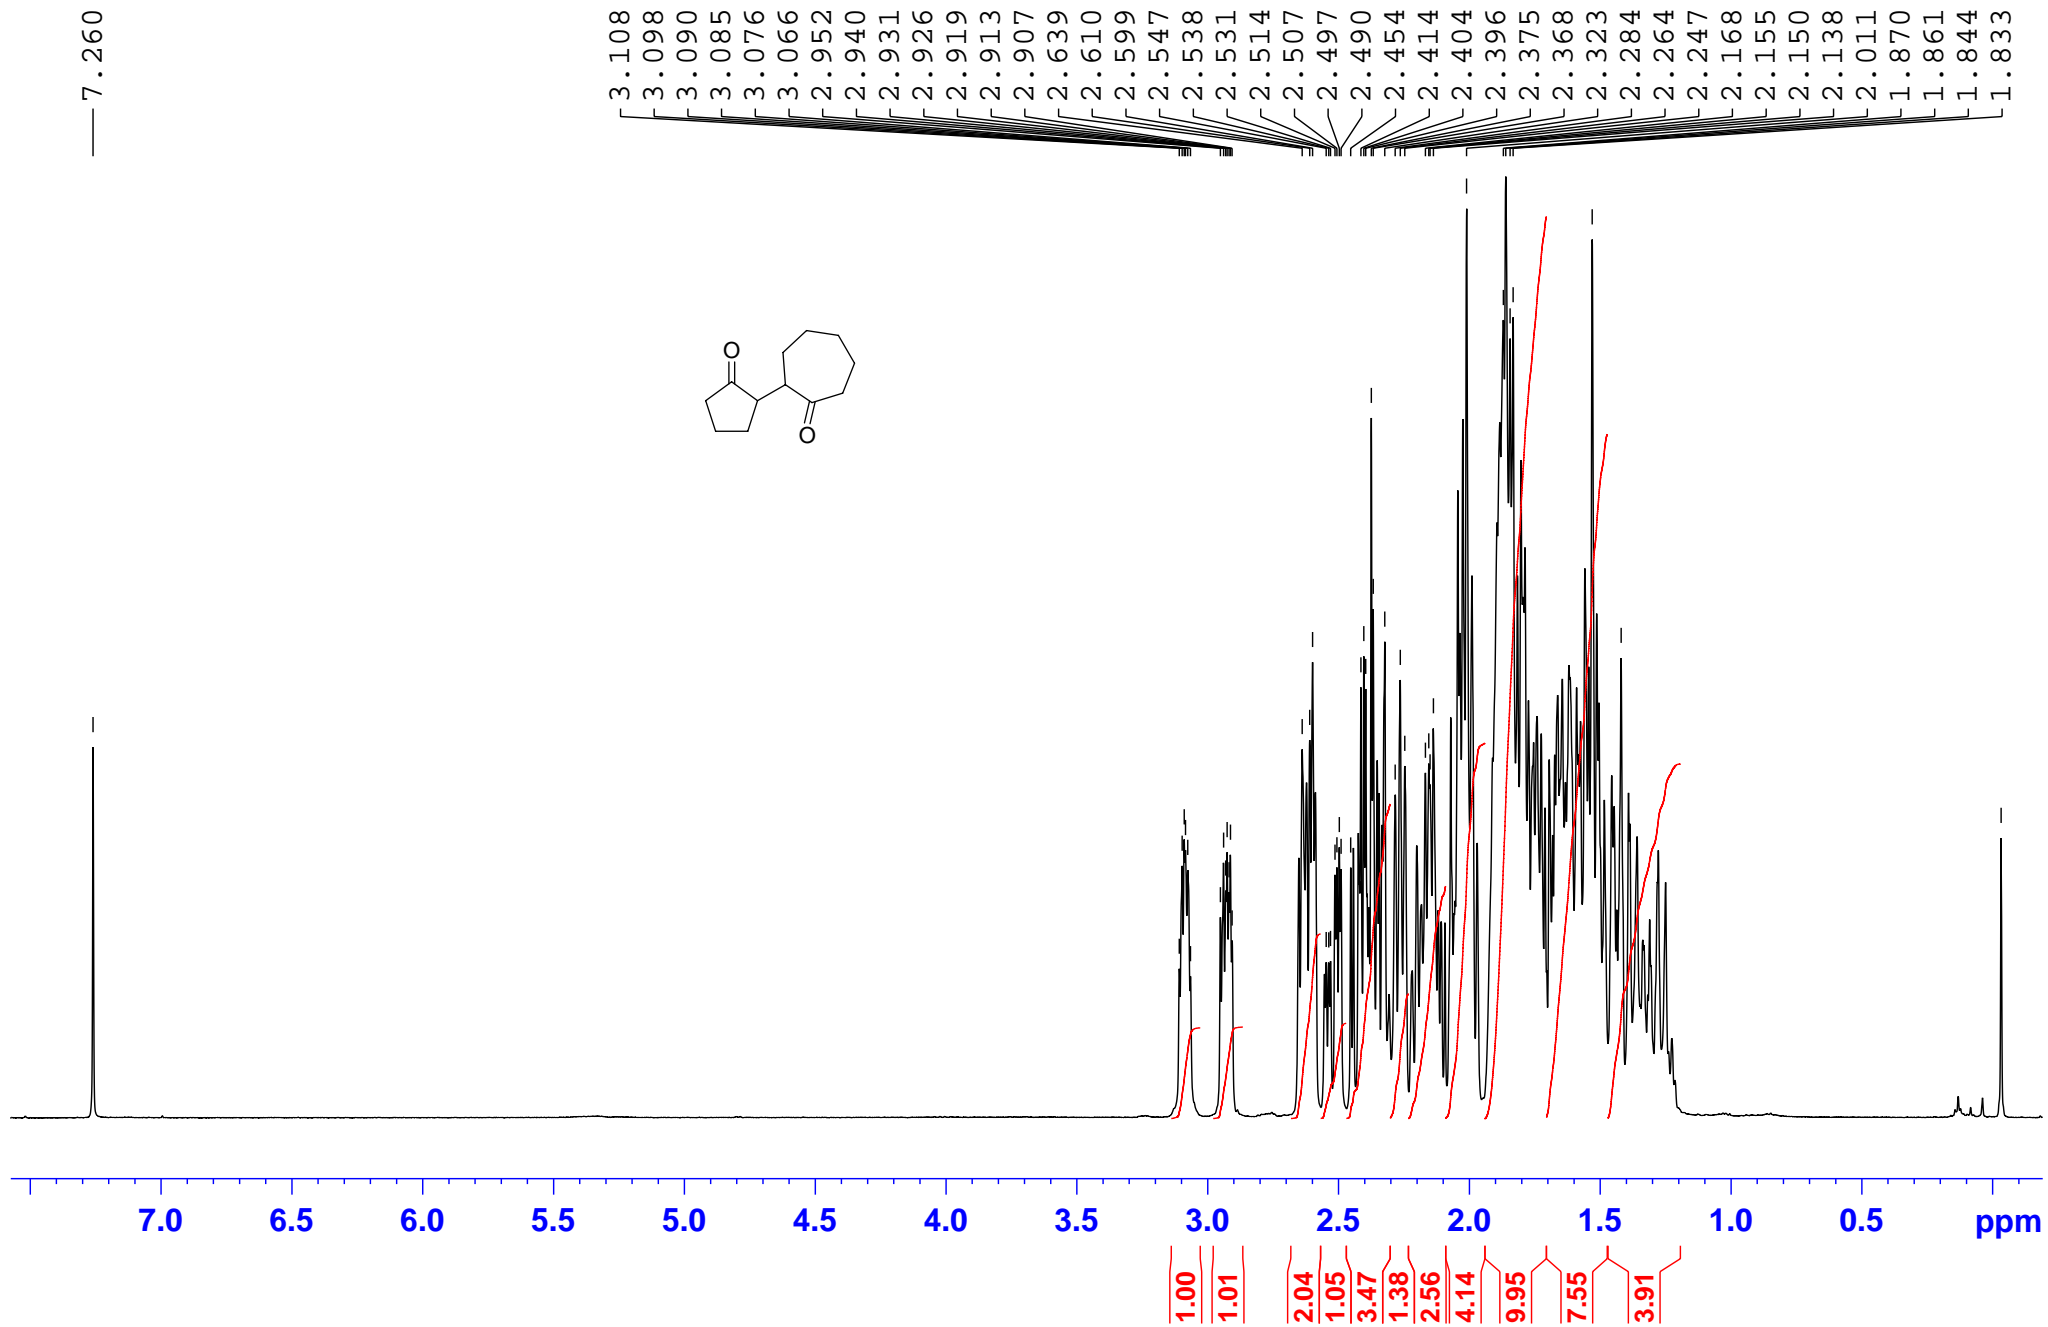

220.06  
220.02  
214.58  
213.75

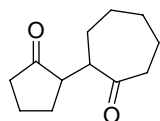

77.39  
77.07  
76.75

52.47  
52.29  
51.73  
51.28  
43.91  
43.78  
37.99  
37.94  
30.16  
29.84  
29.74  
29.28  
29.17  
28.83  
26.38  
25.71  
23.90  
23.69  
21.04  
20.78

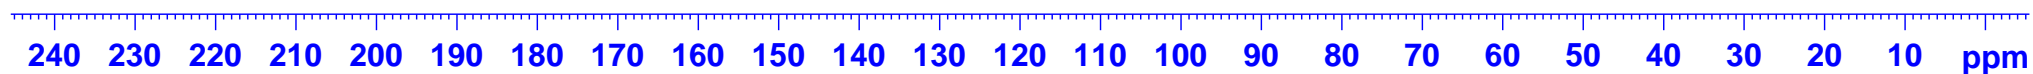



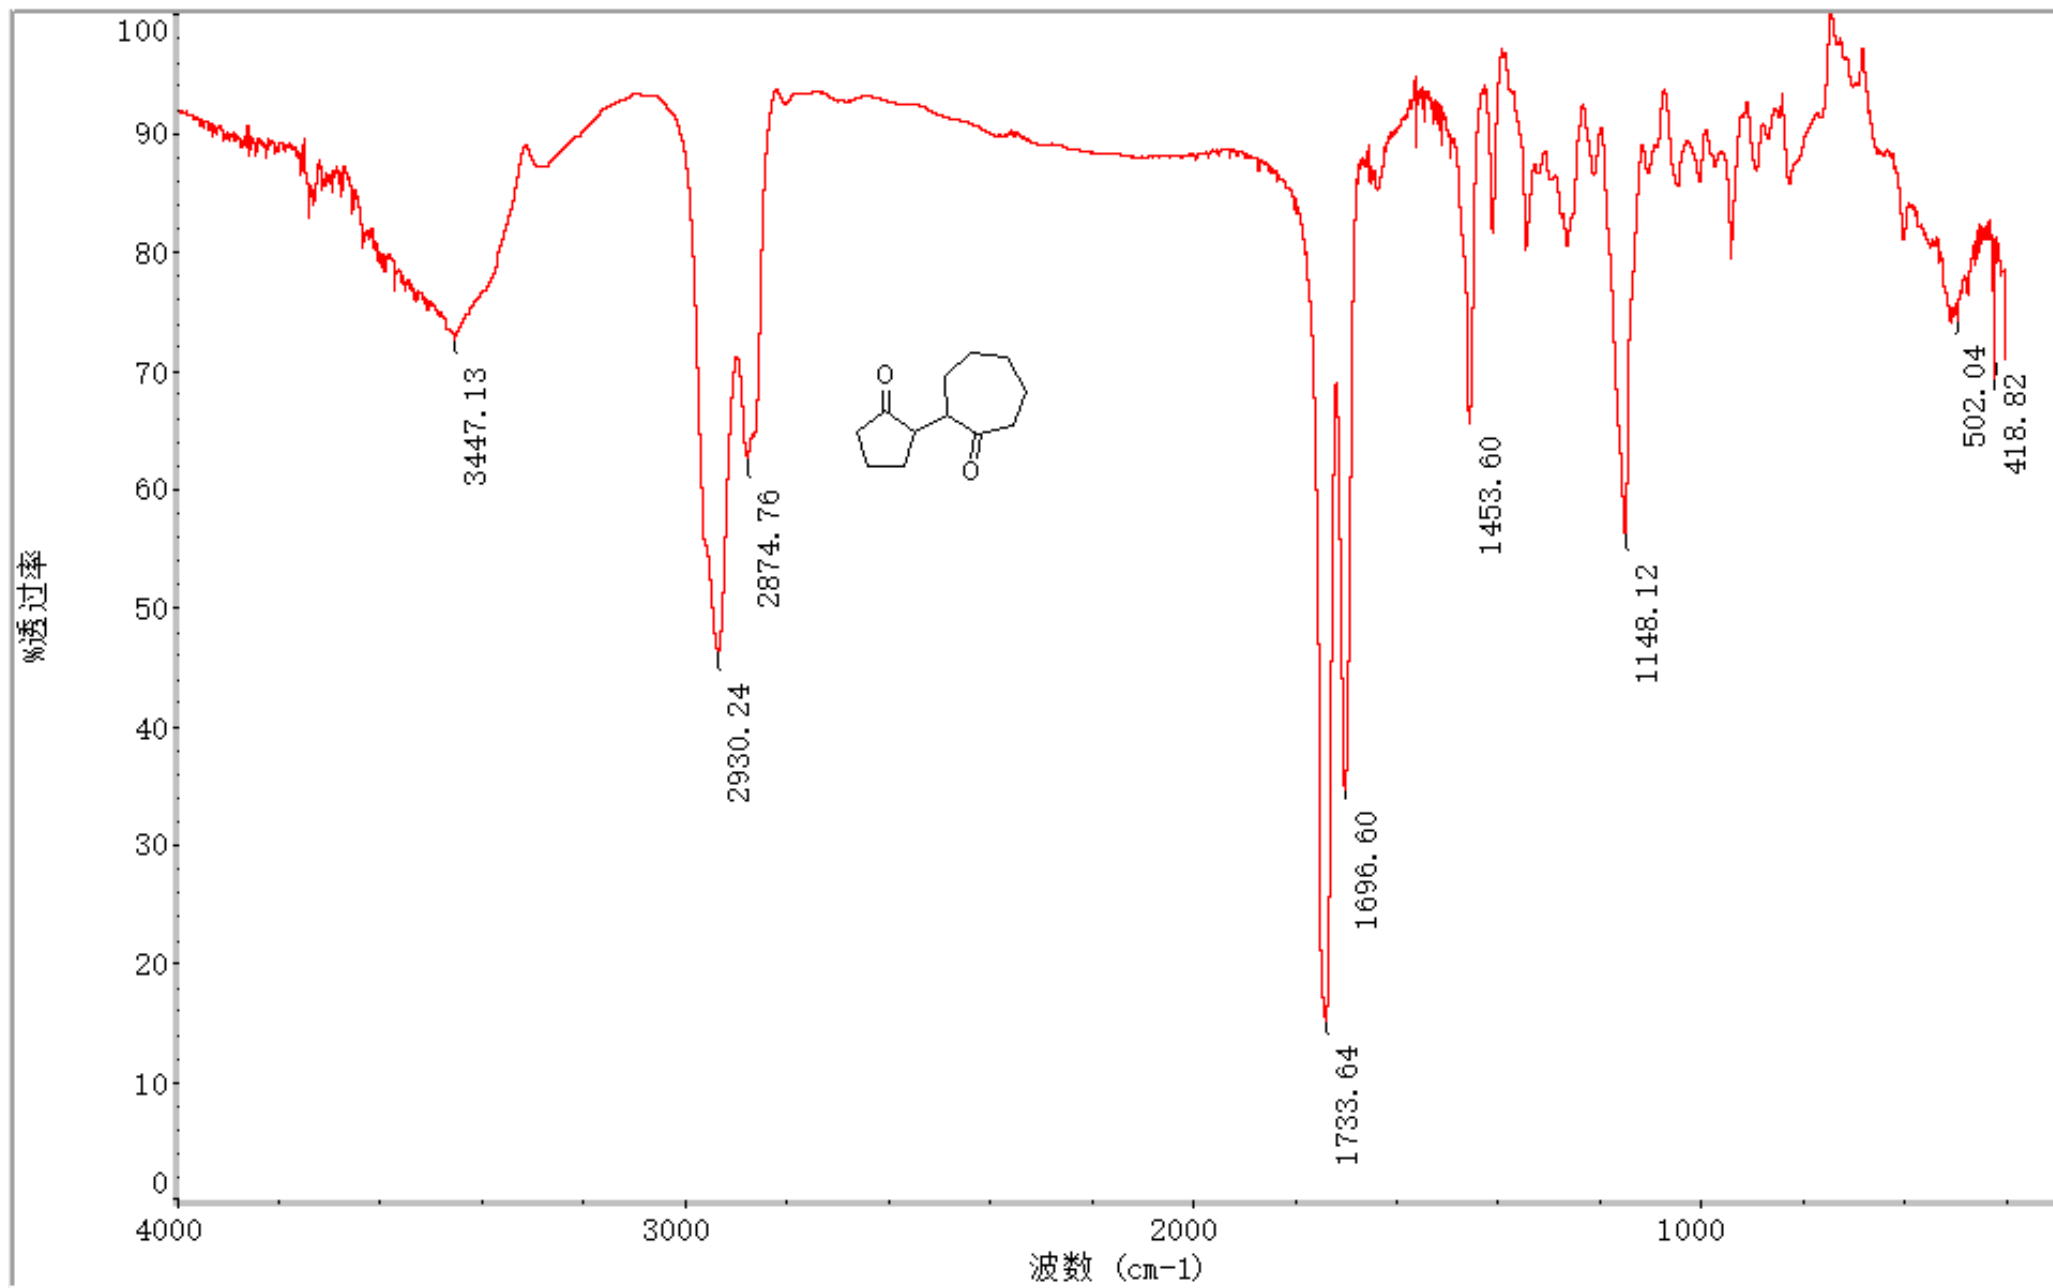

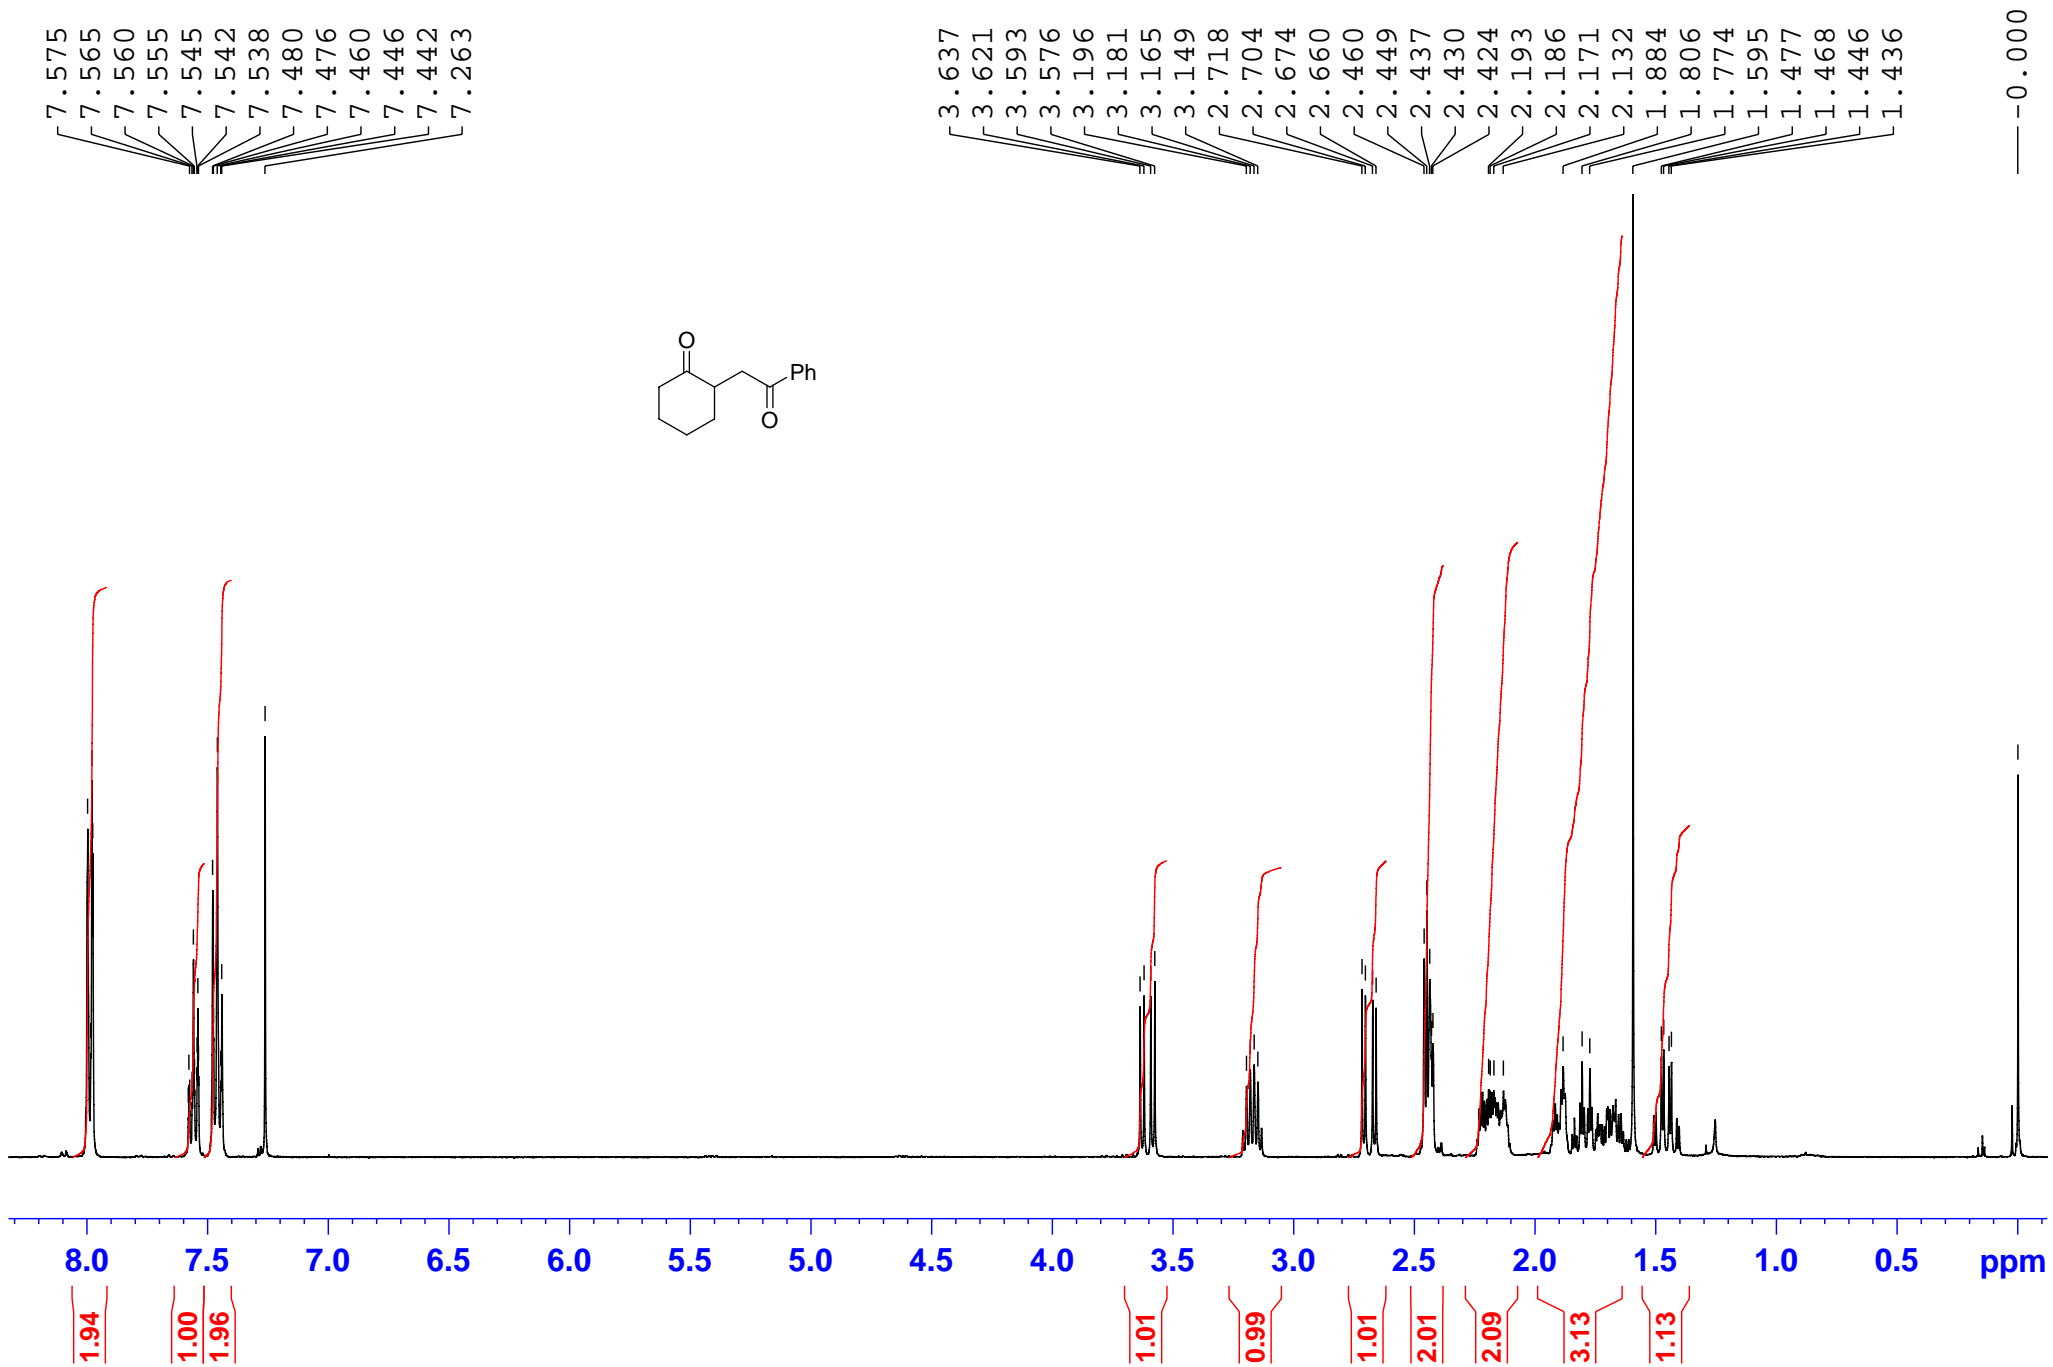

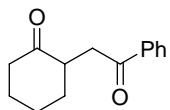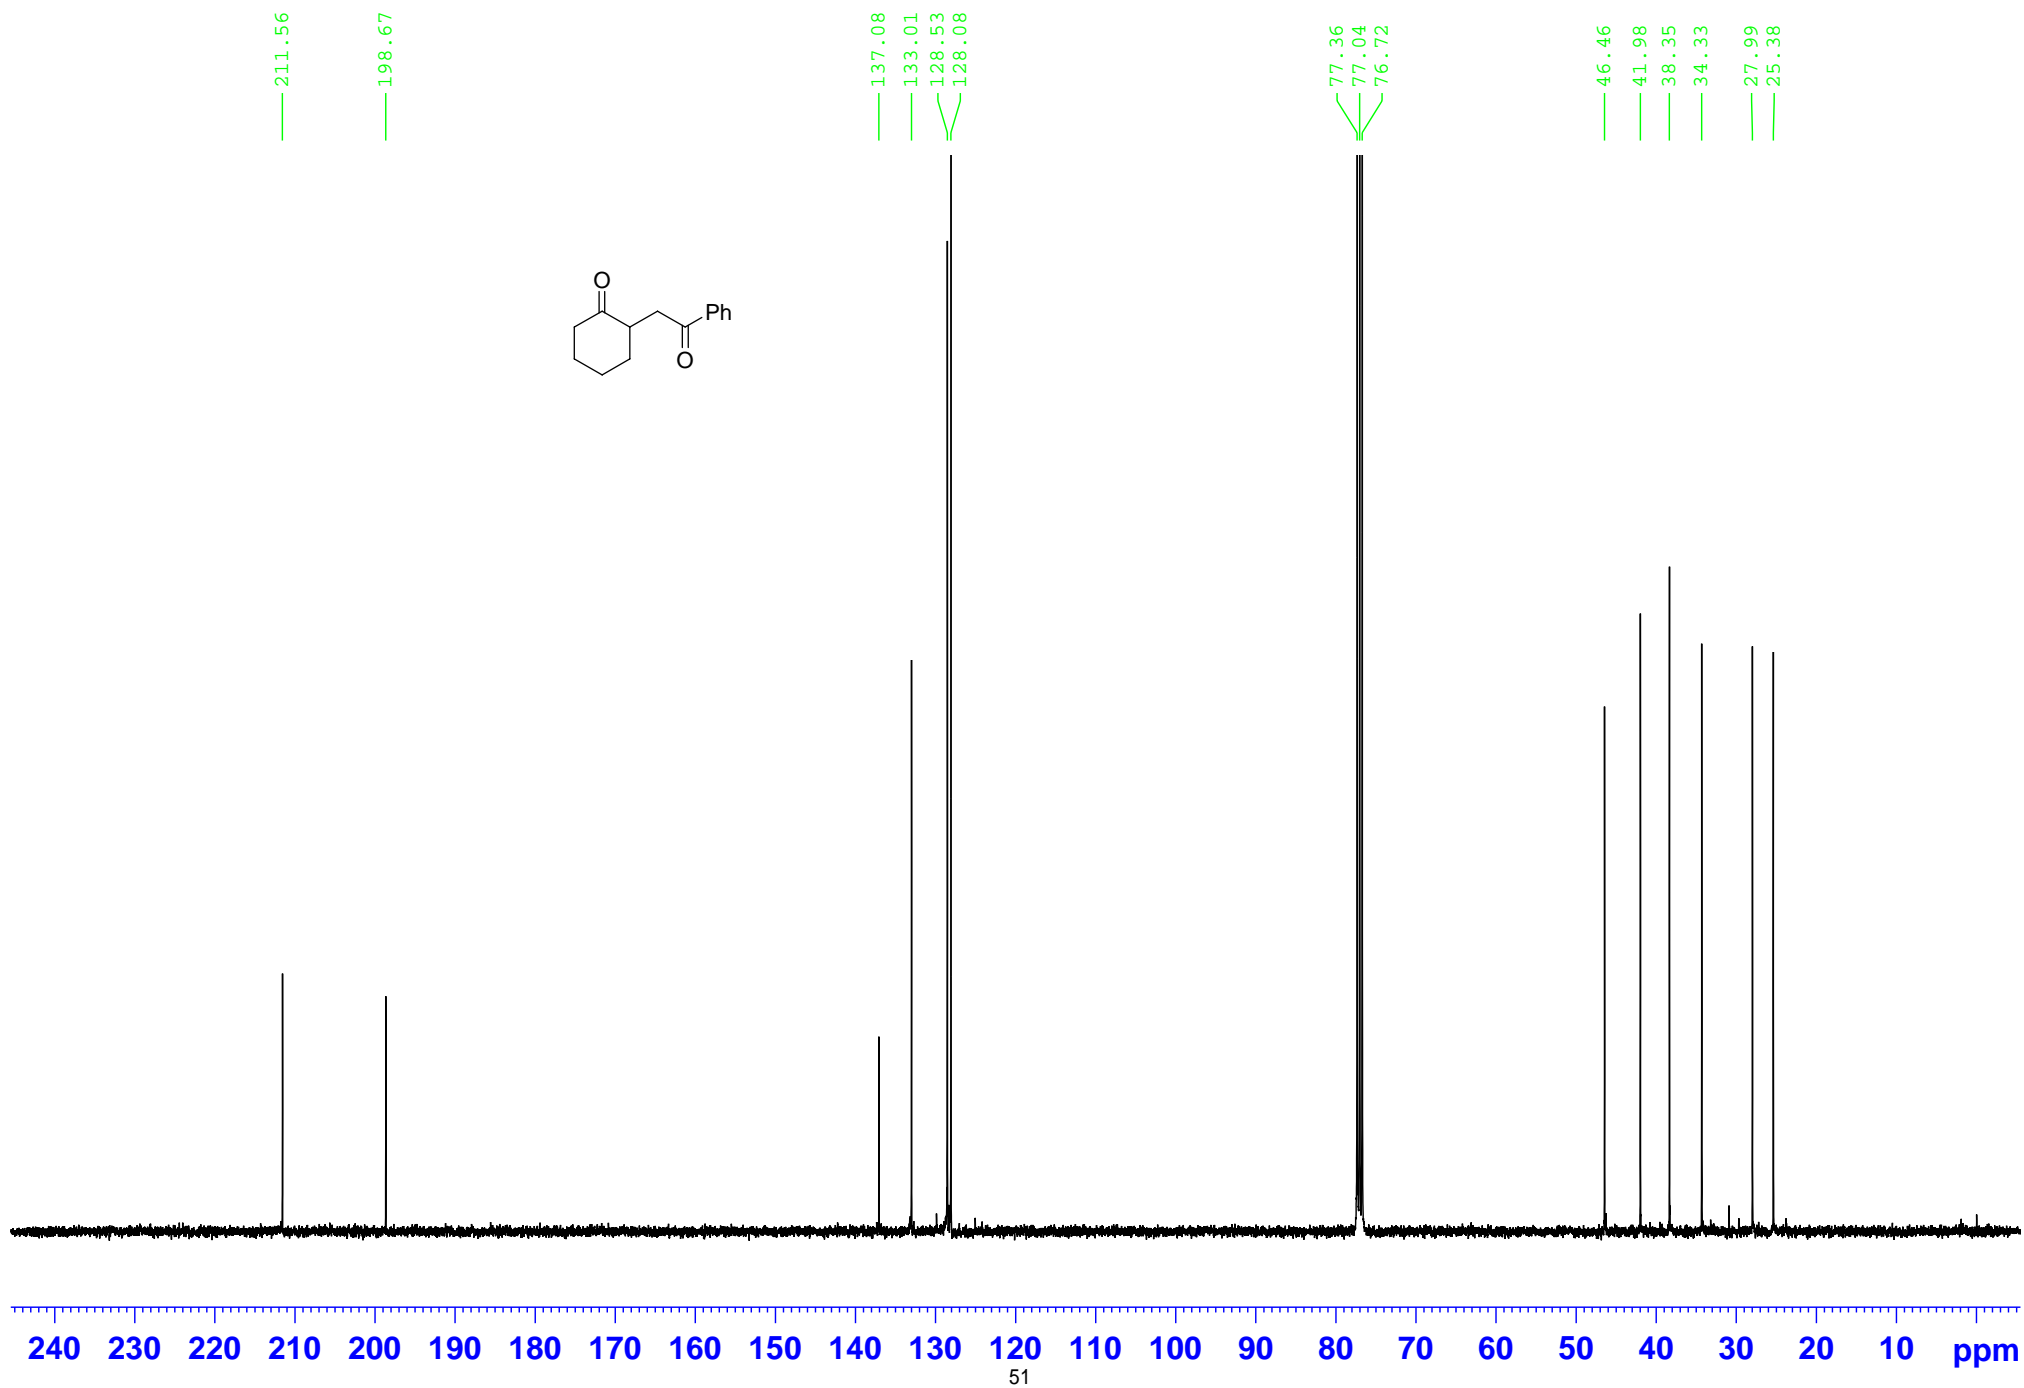

— 7.269

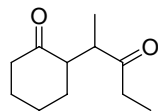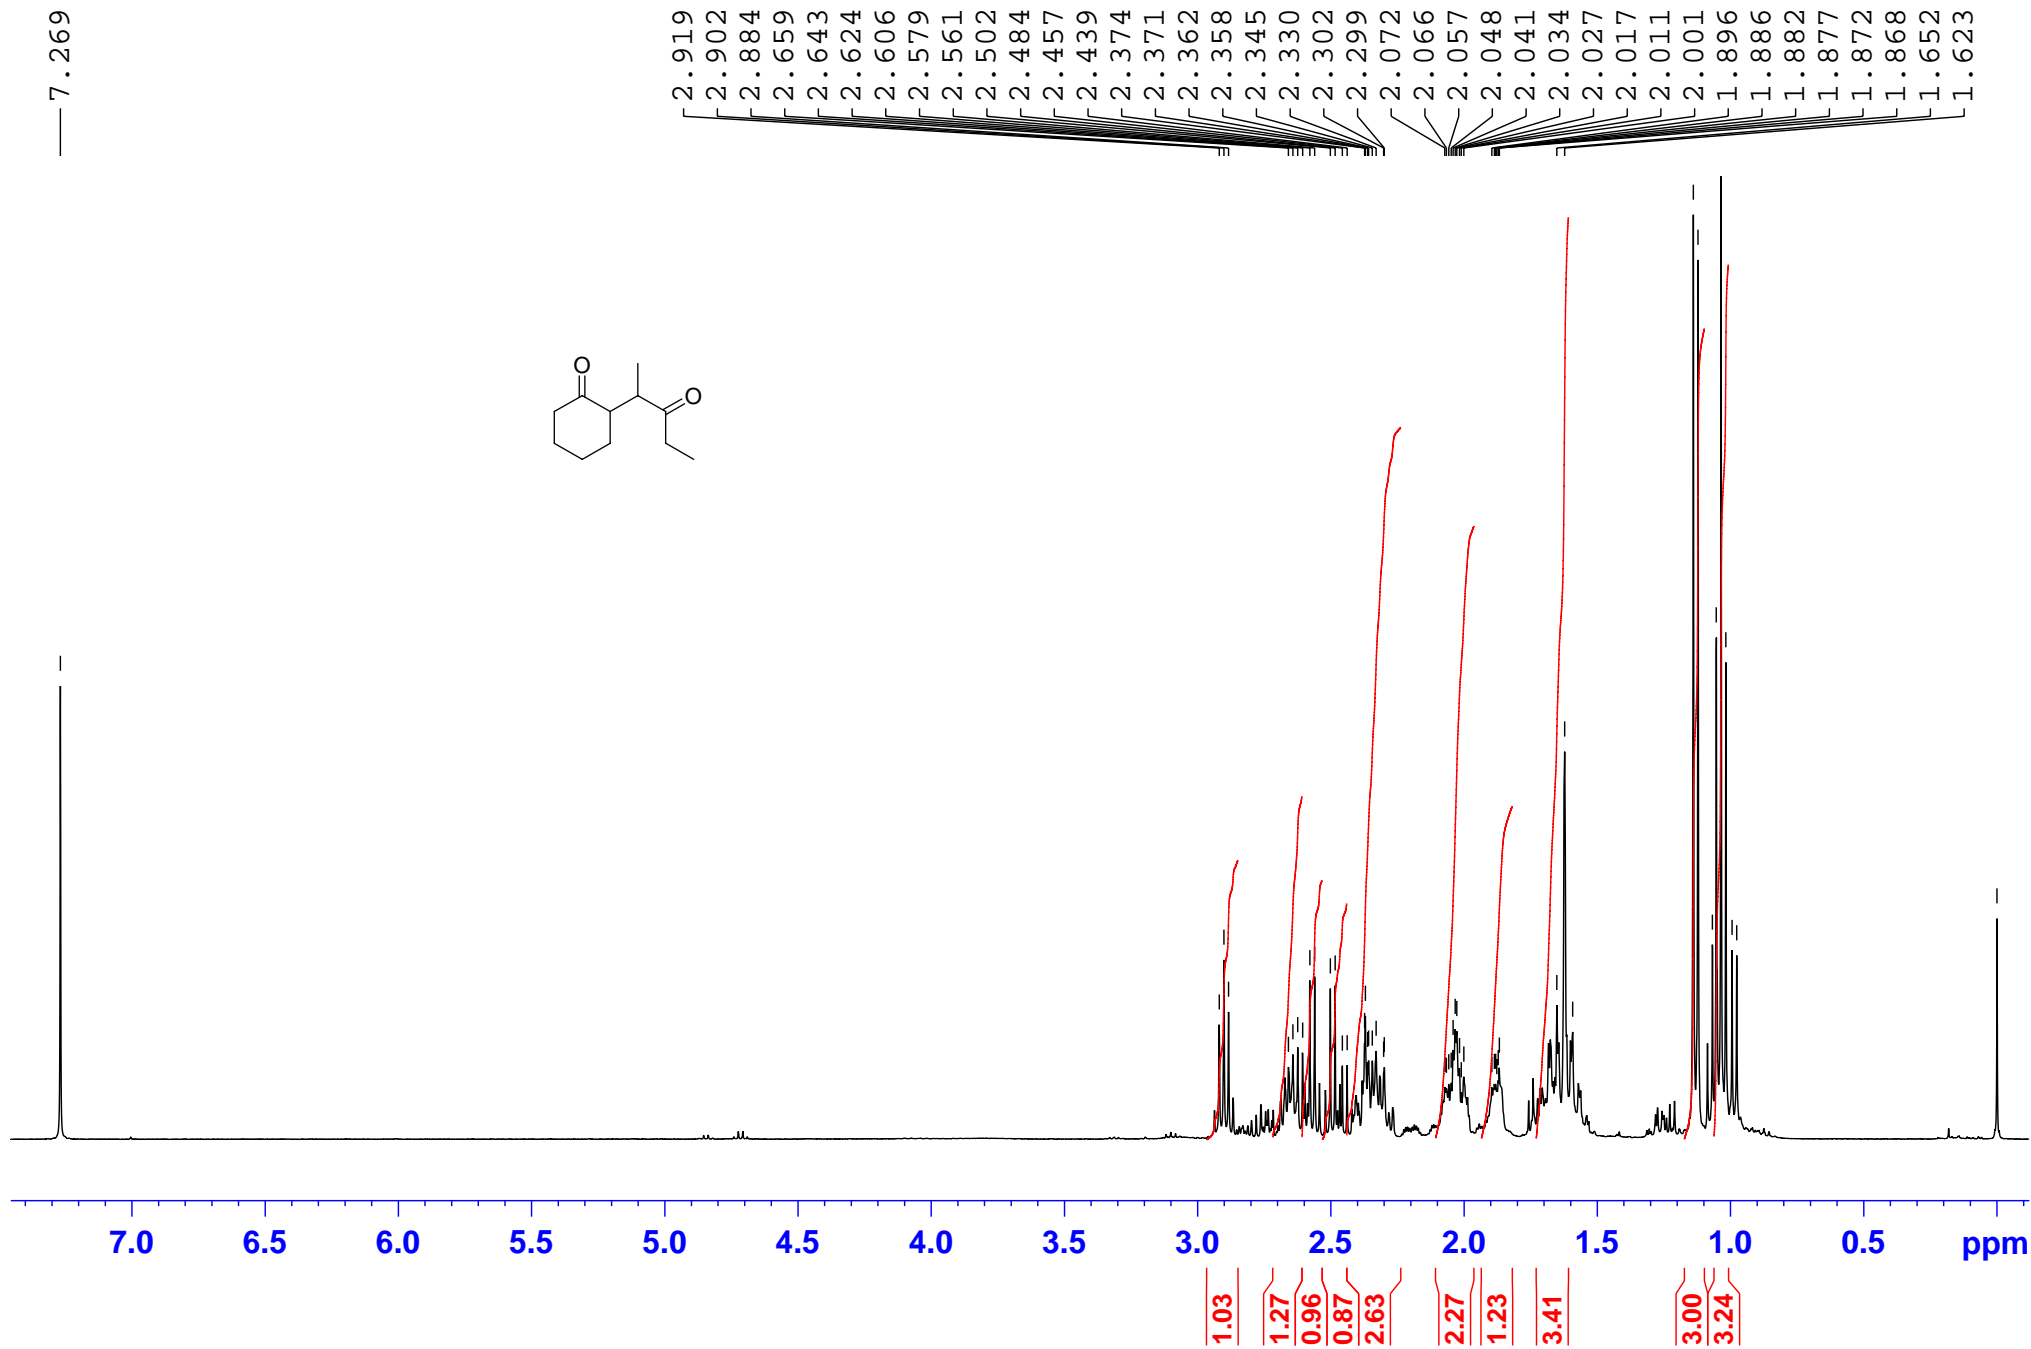

214.43  
211.74

77.34  
77.02  
76.71

53.82

44.88  
42.28

35.41  
30.88

27.70  
25.14

14.81

7.59

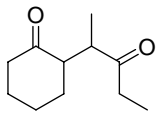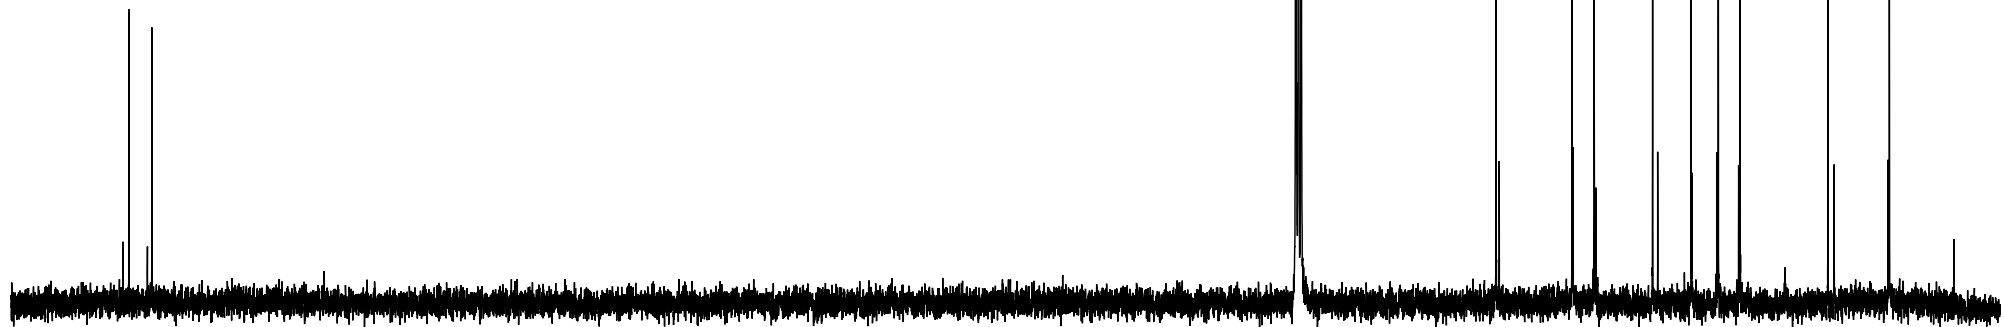

220 210 200 190 180 170 160 150 140 130 120 110 100 90 80 70 60 50 40 30 20 10 ppm

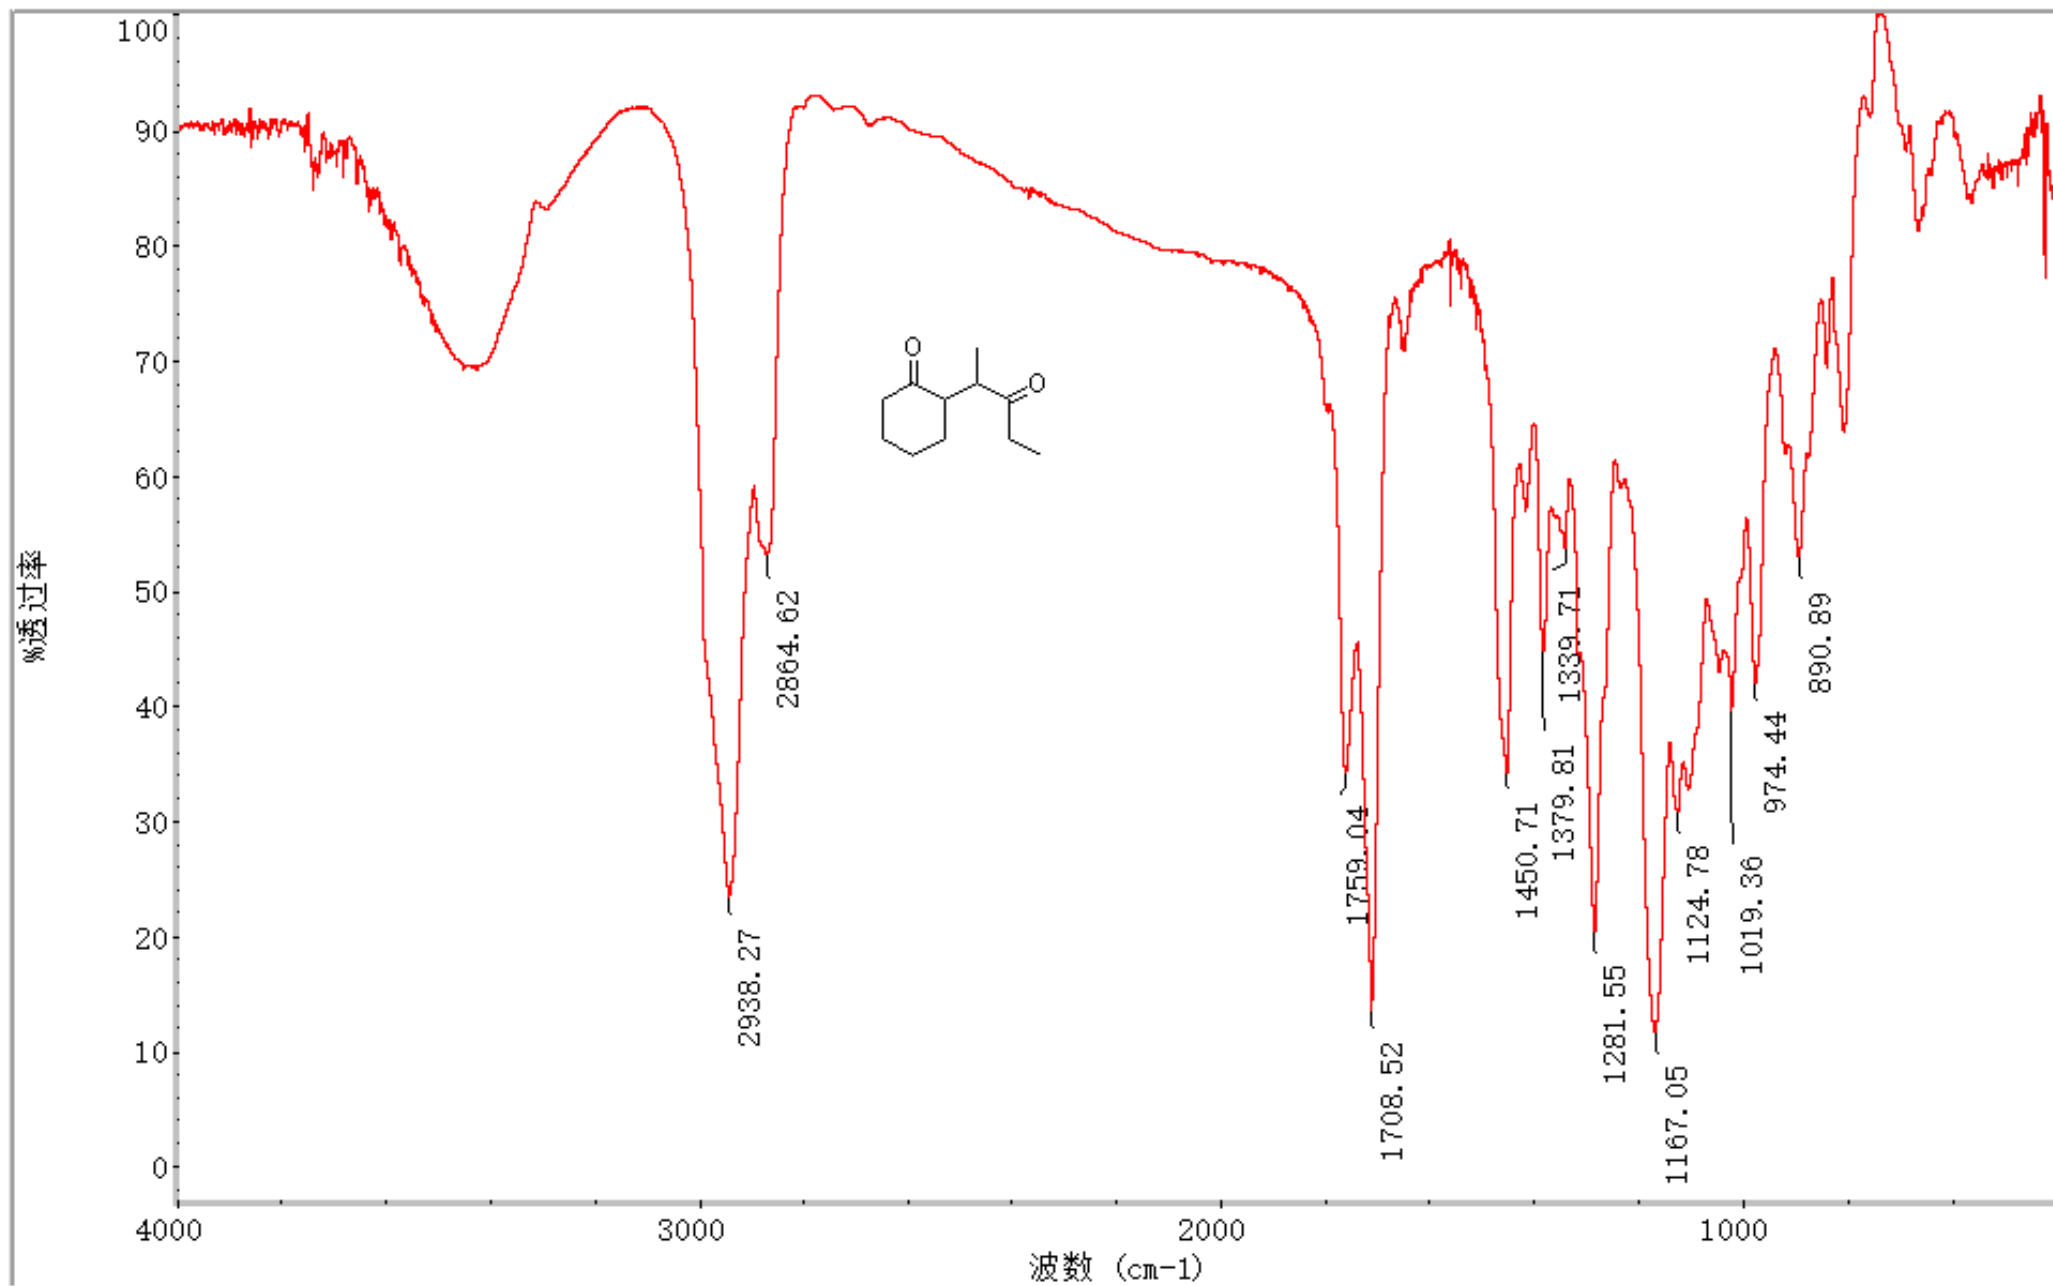

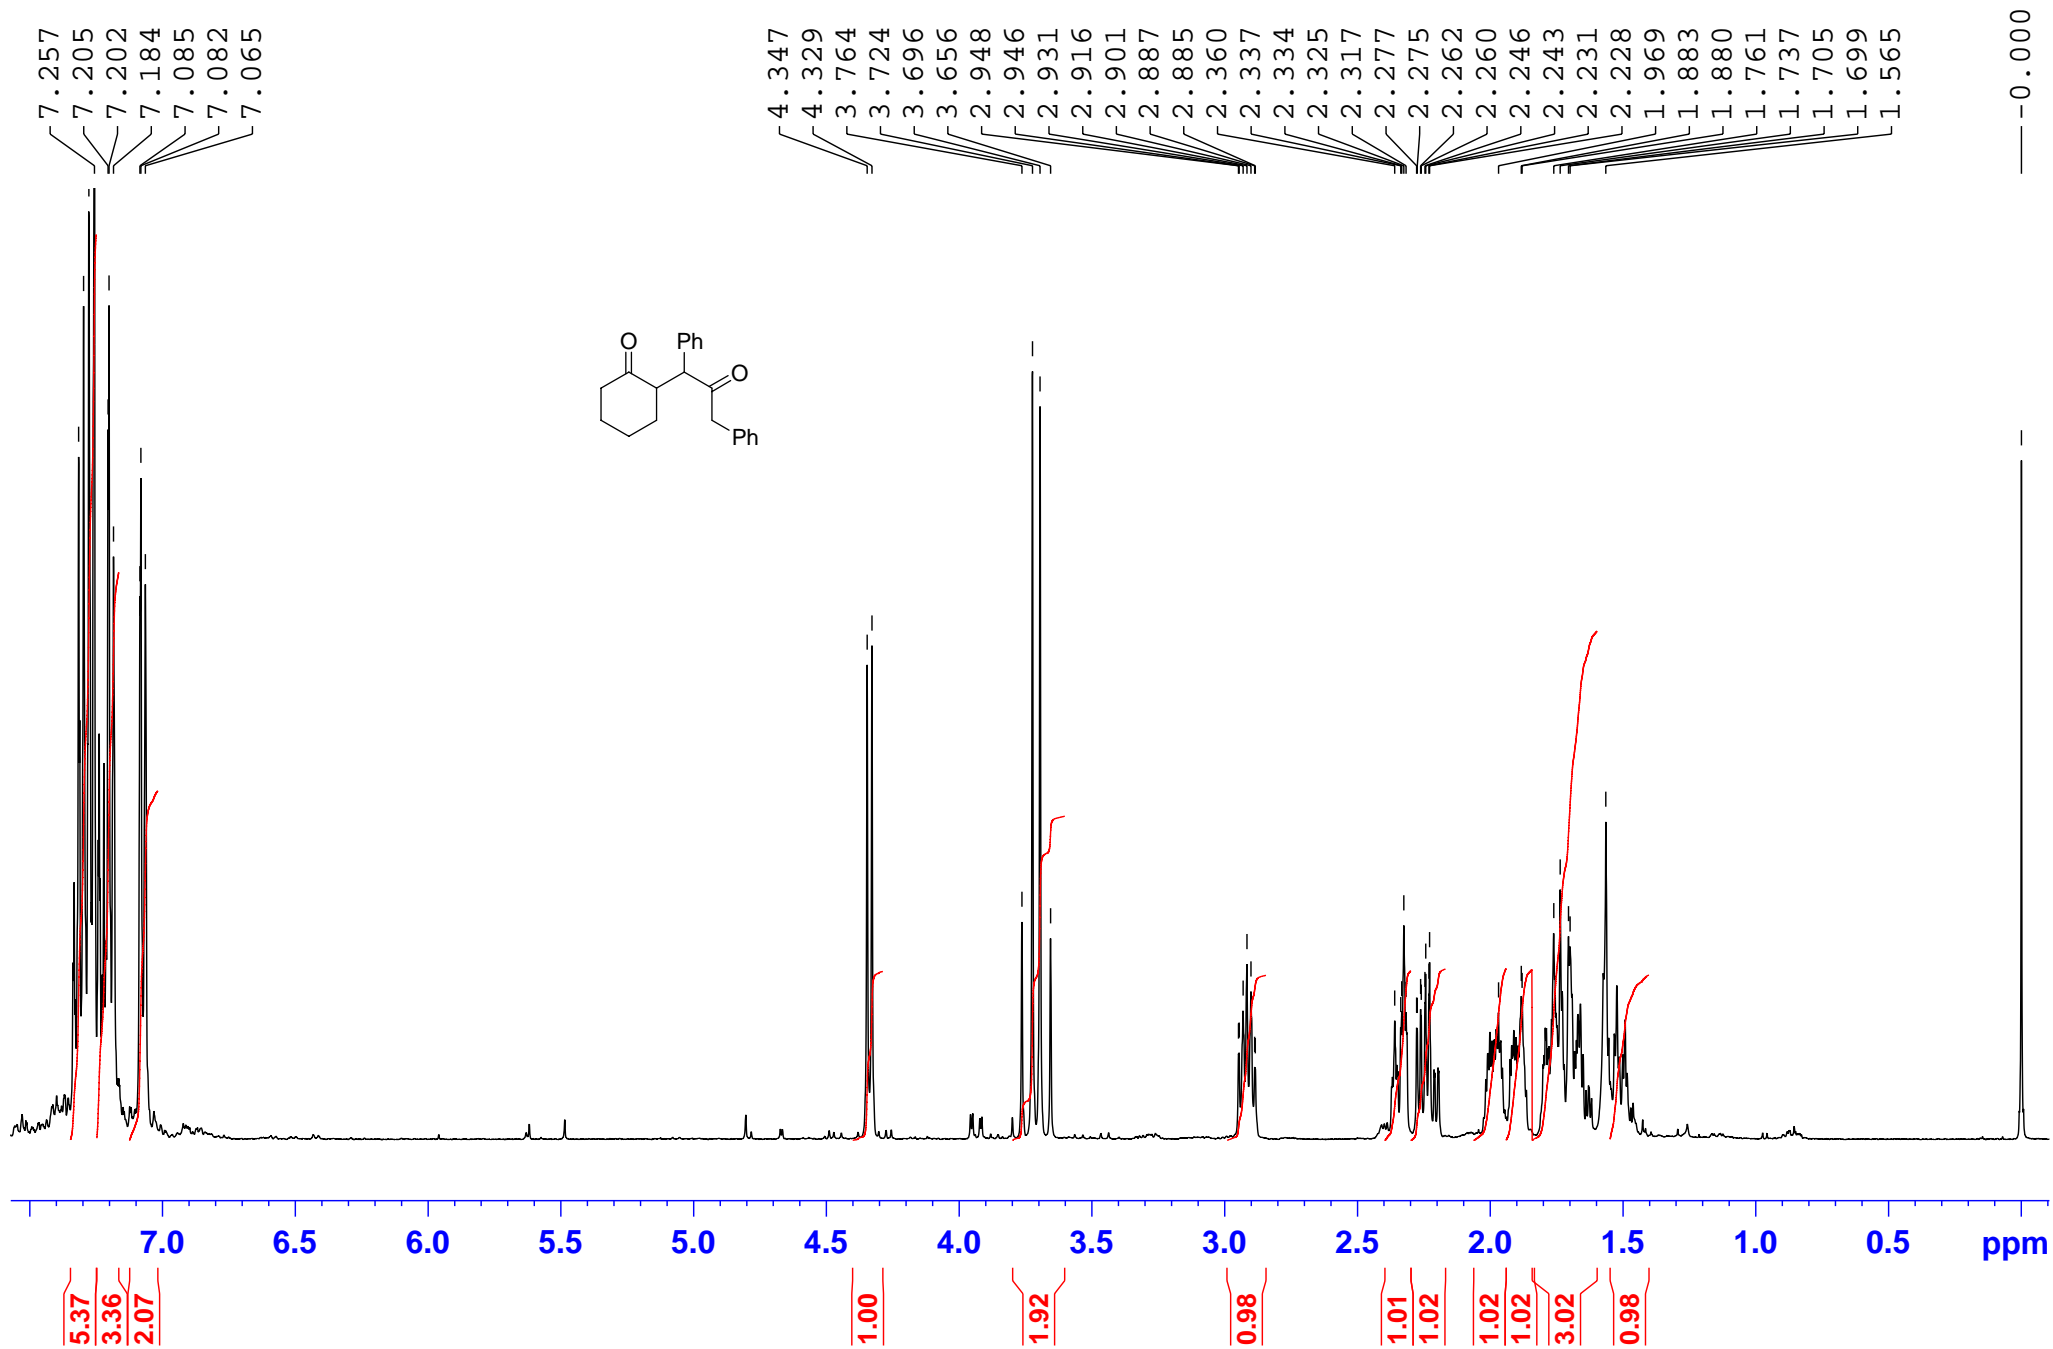

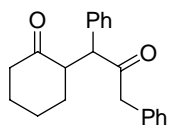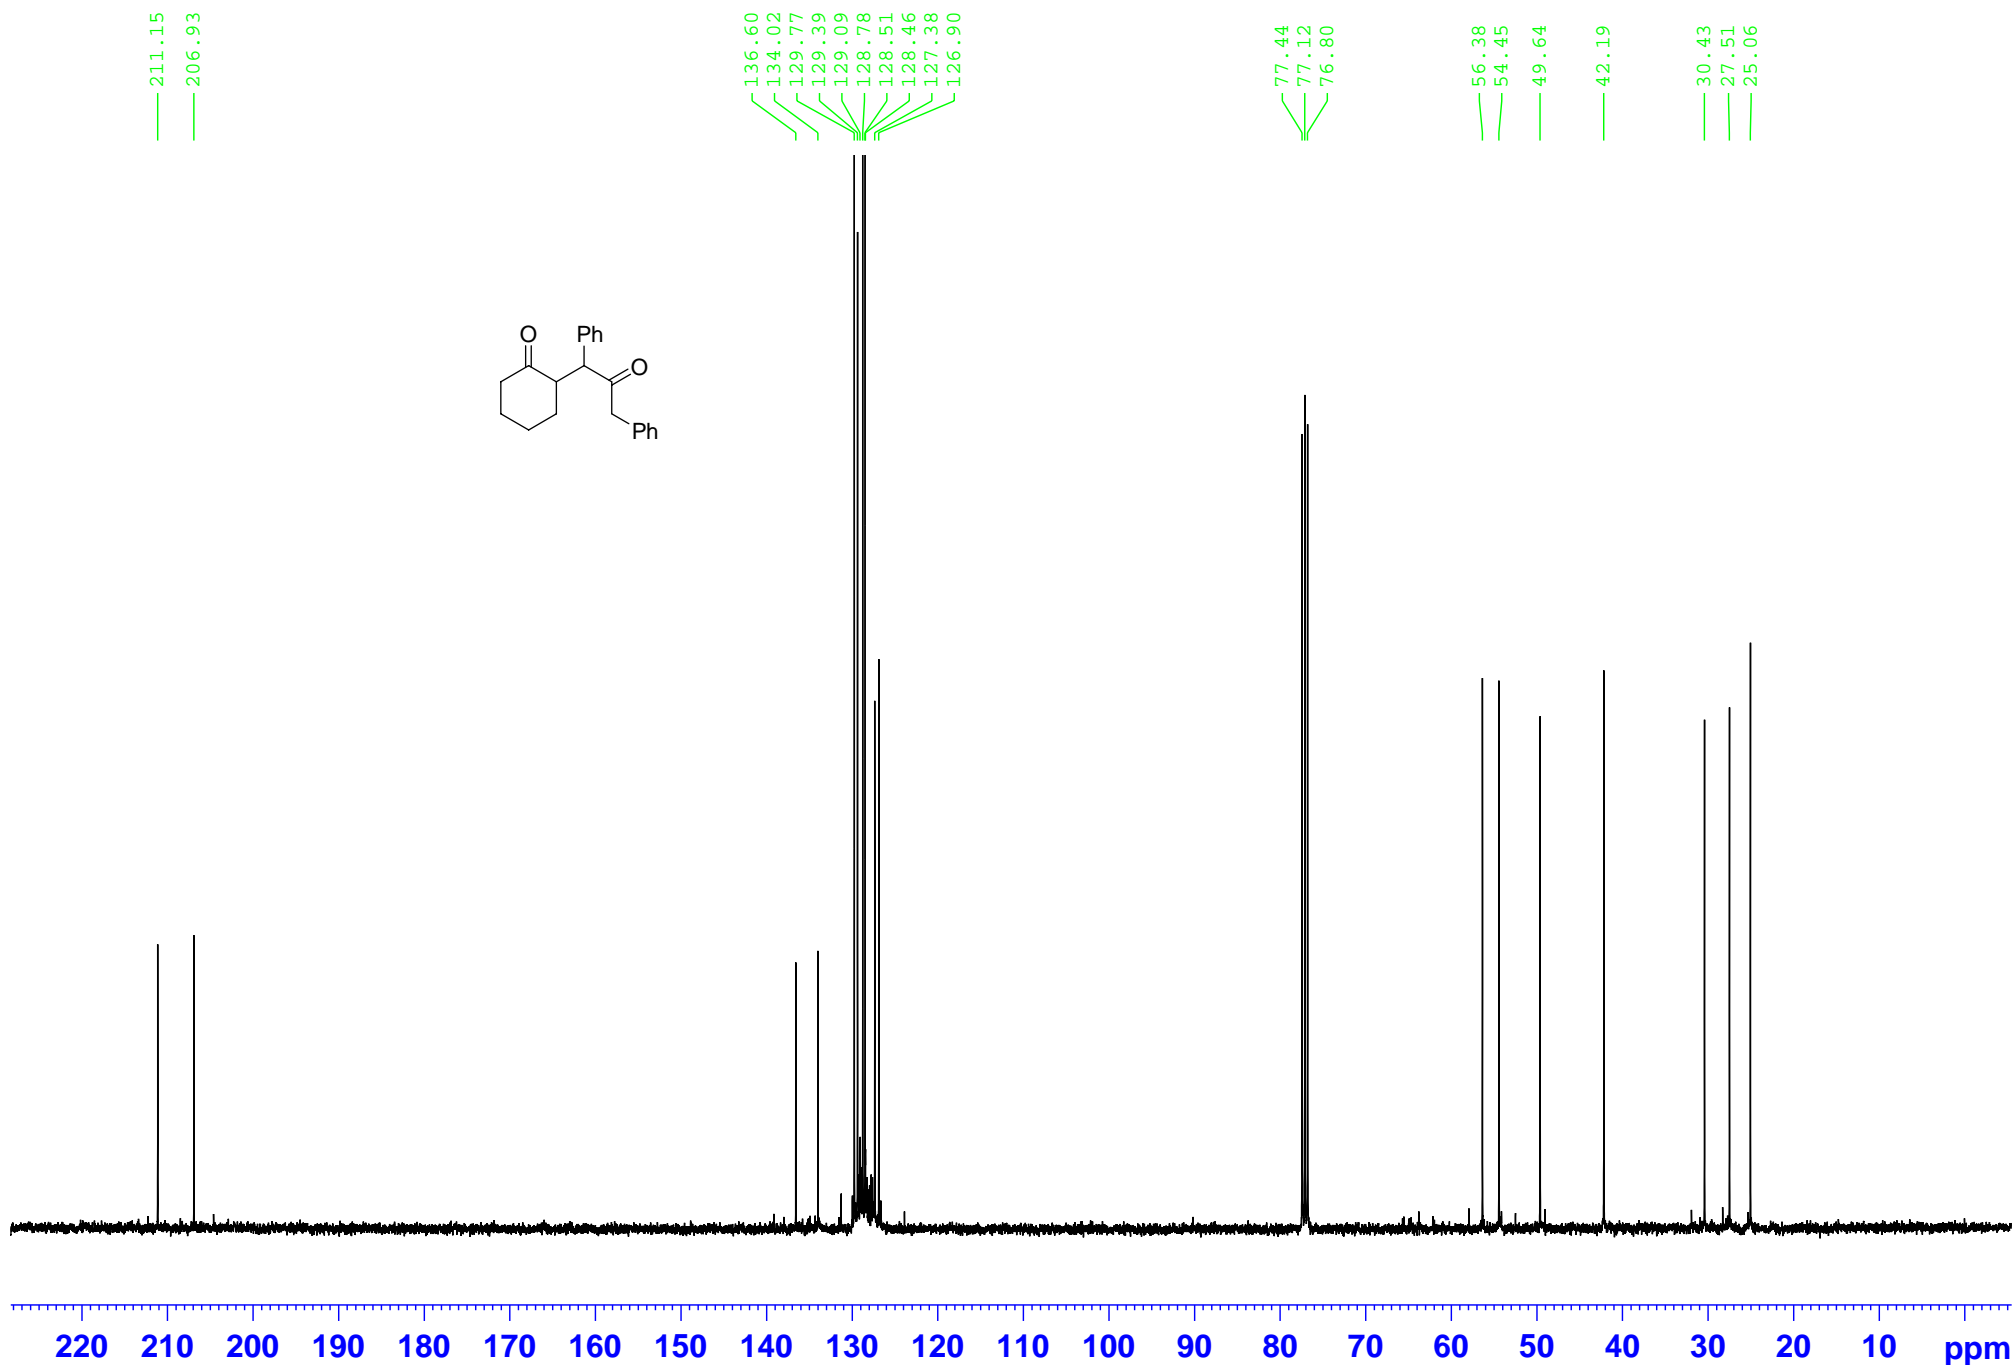



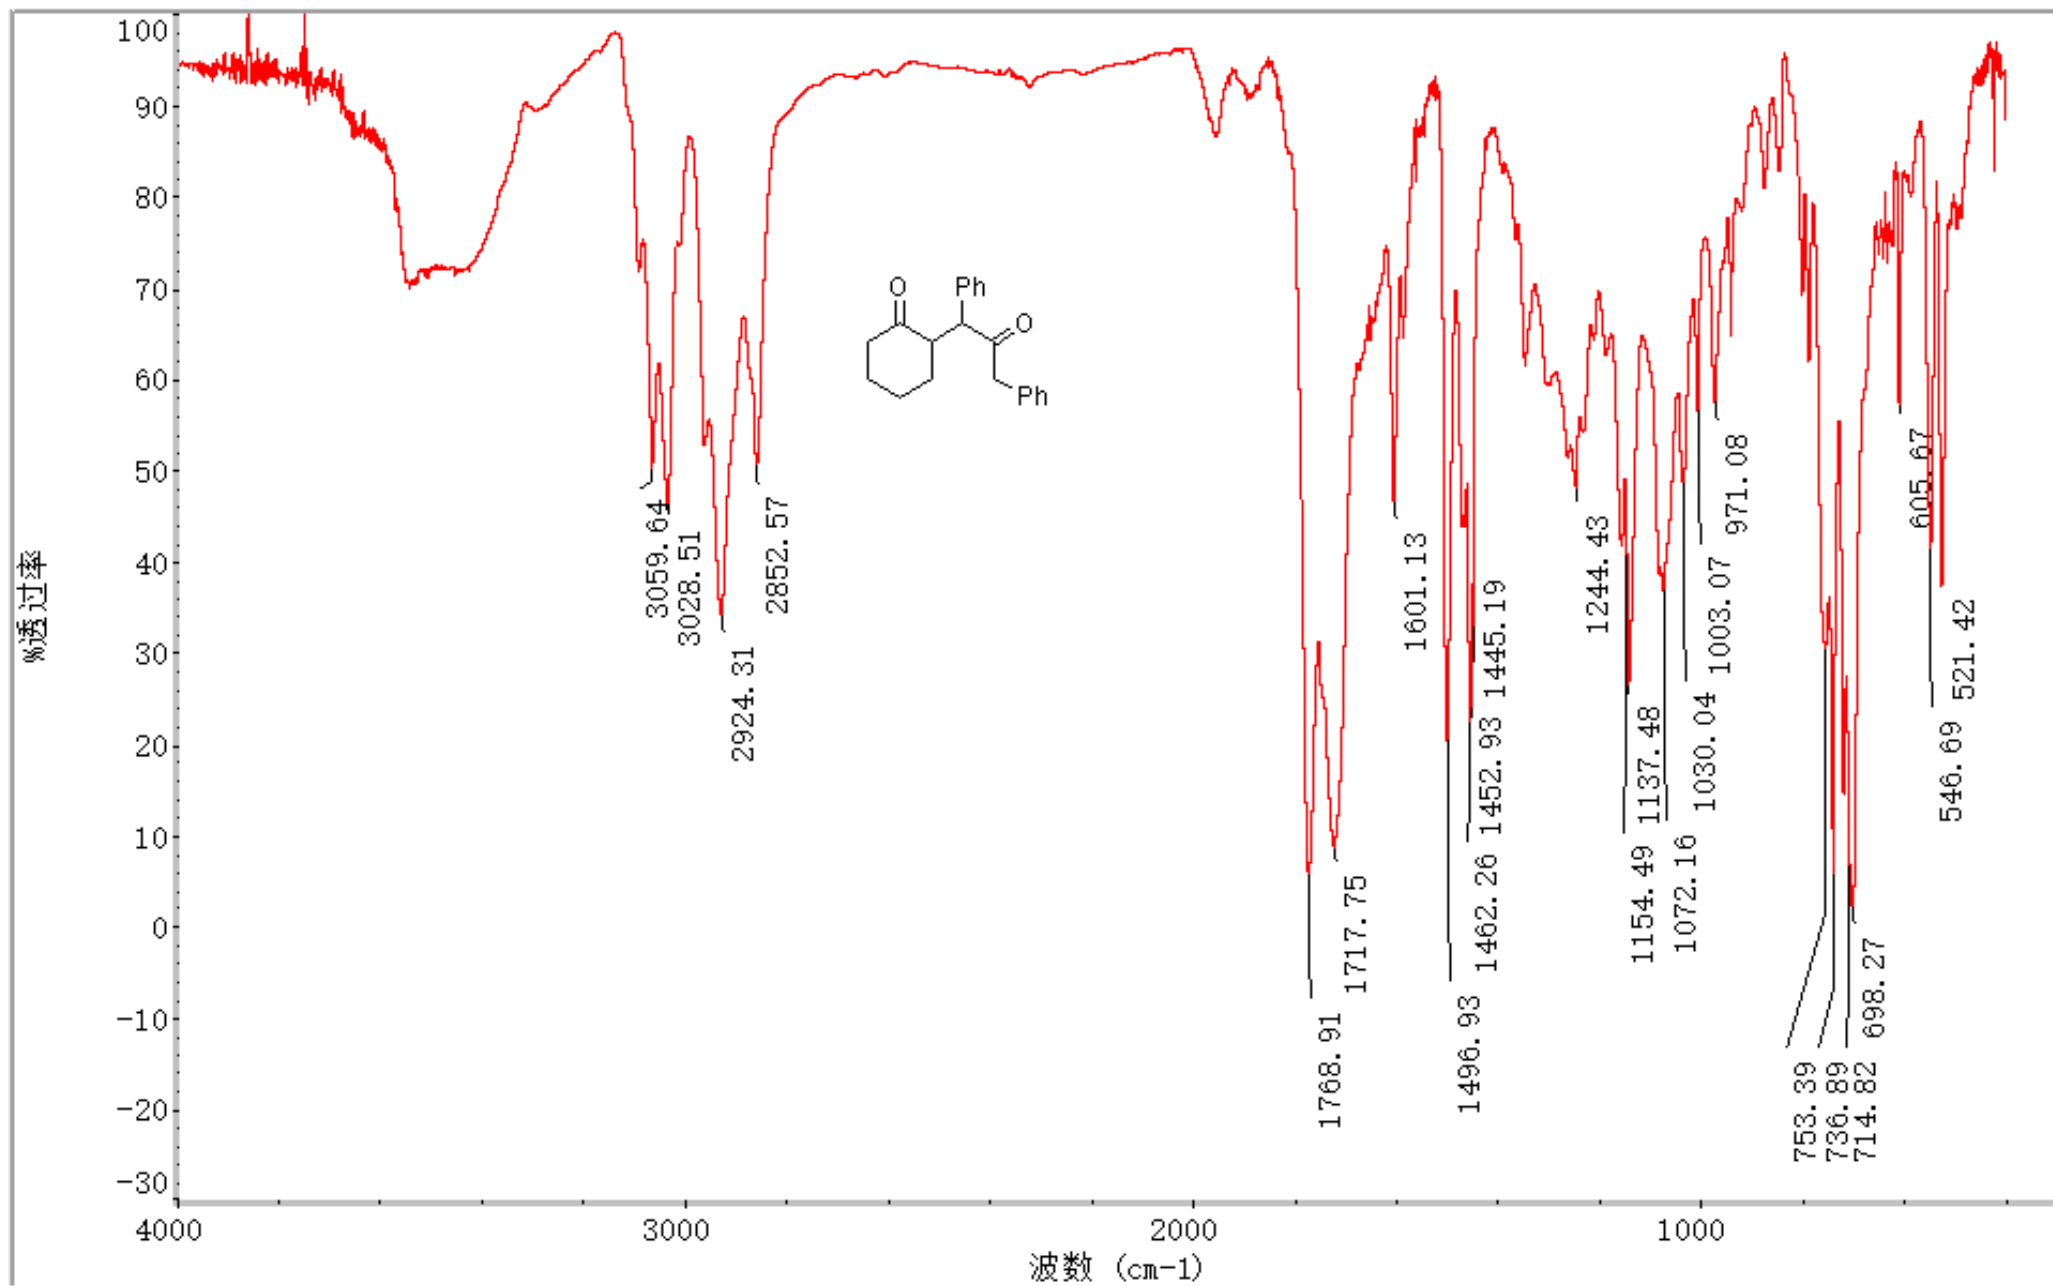

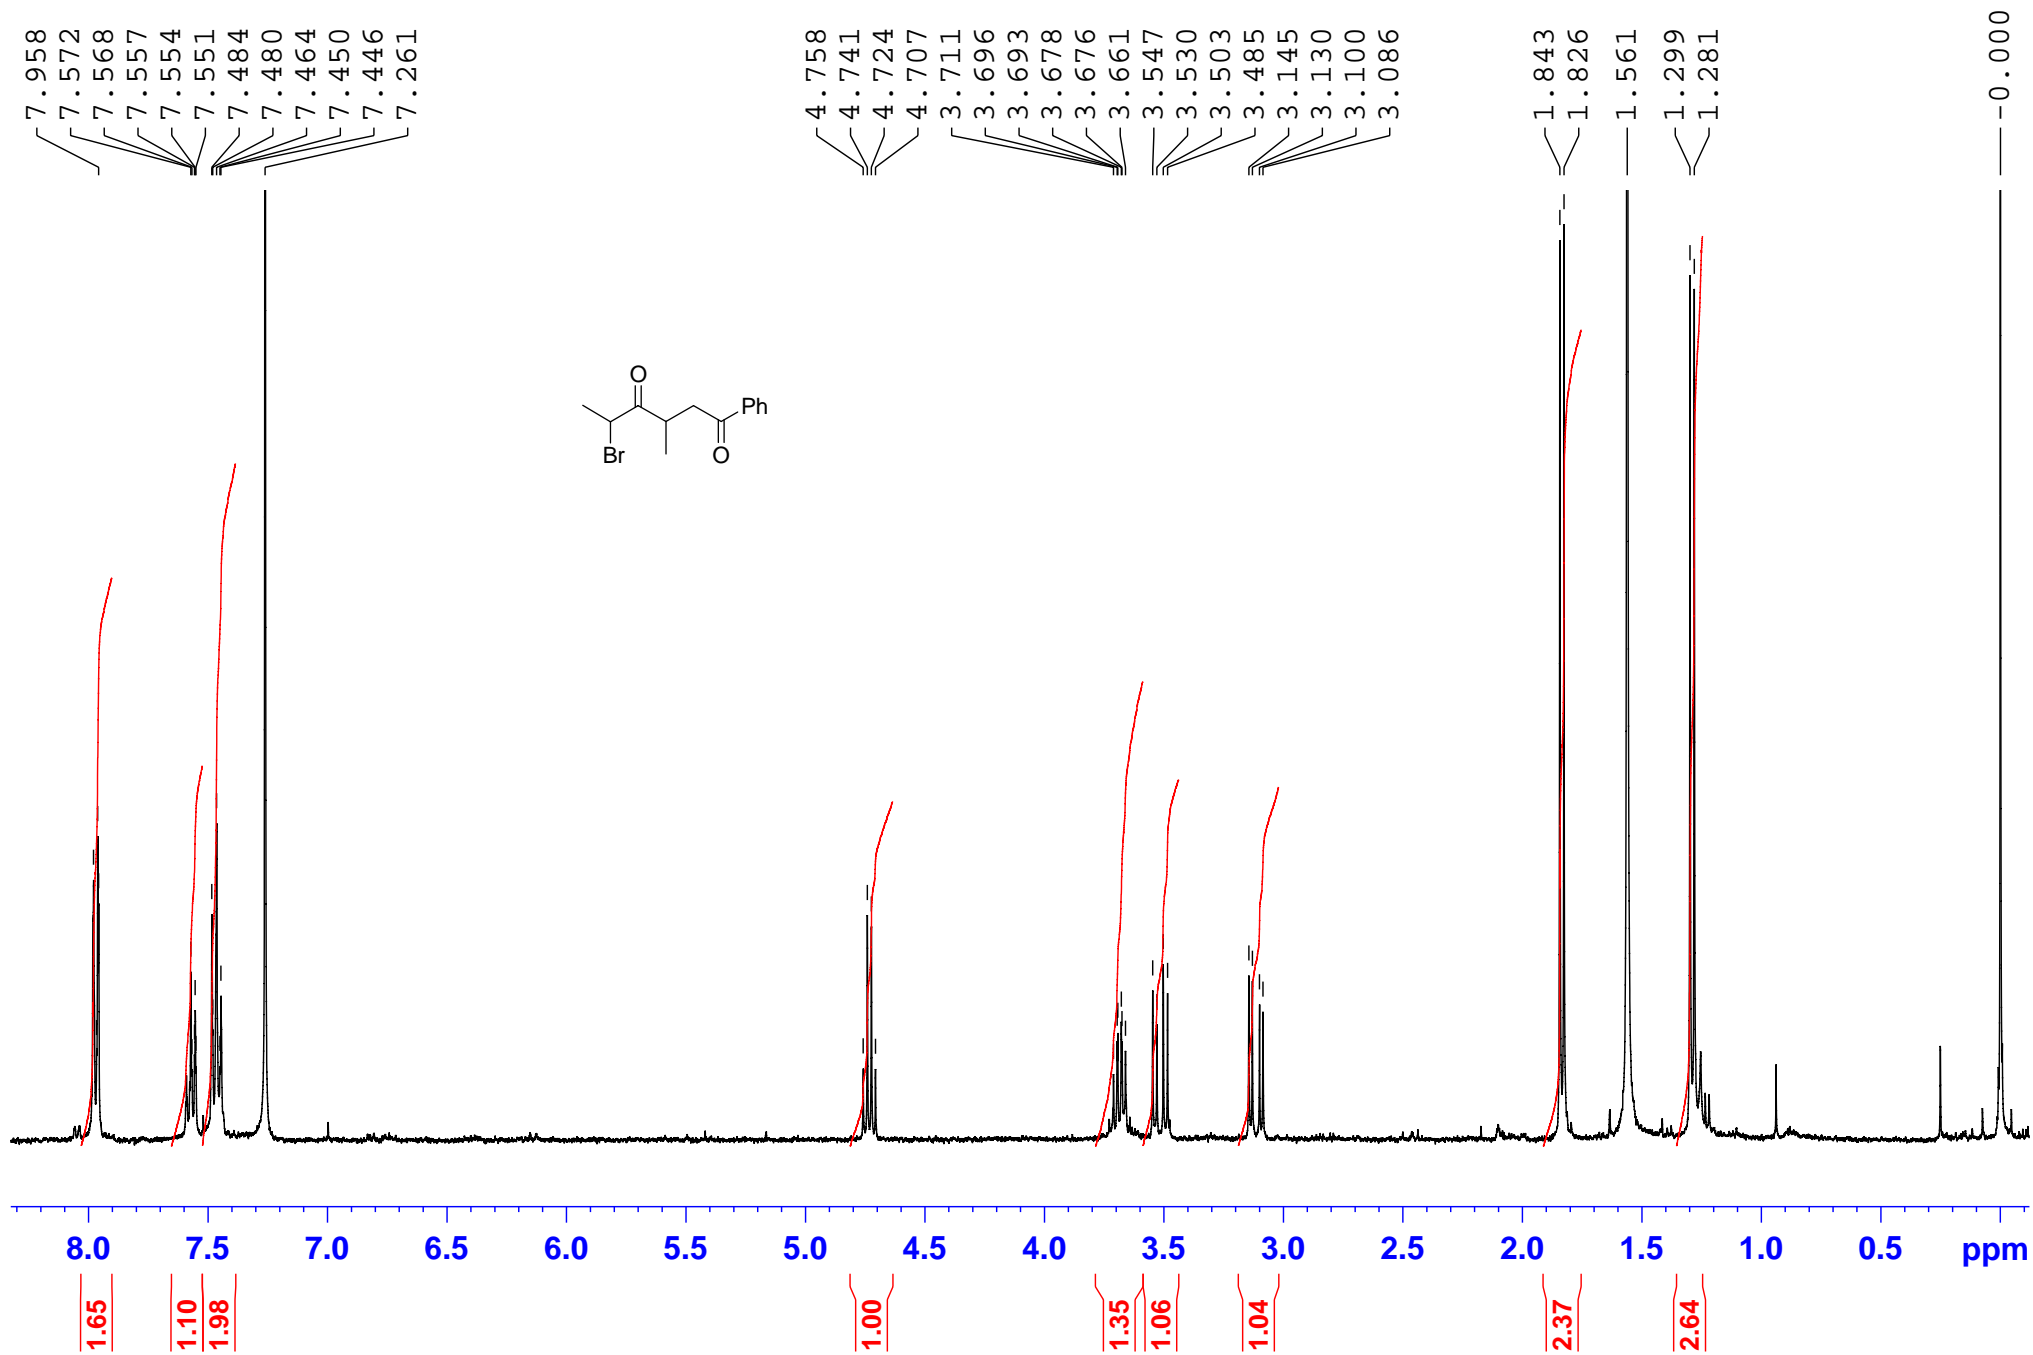

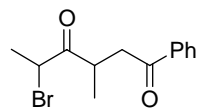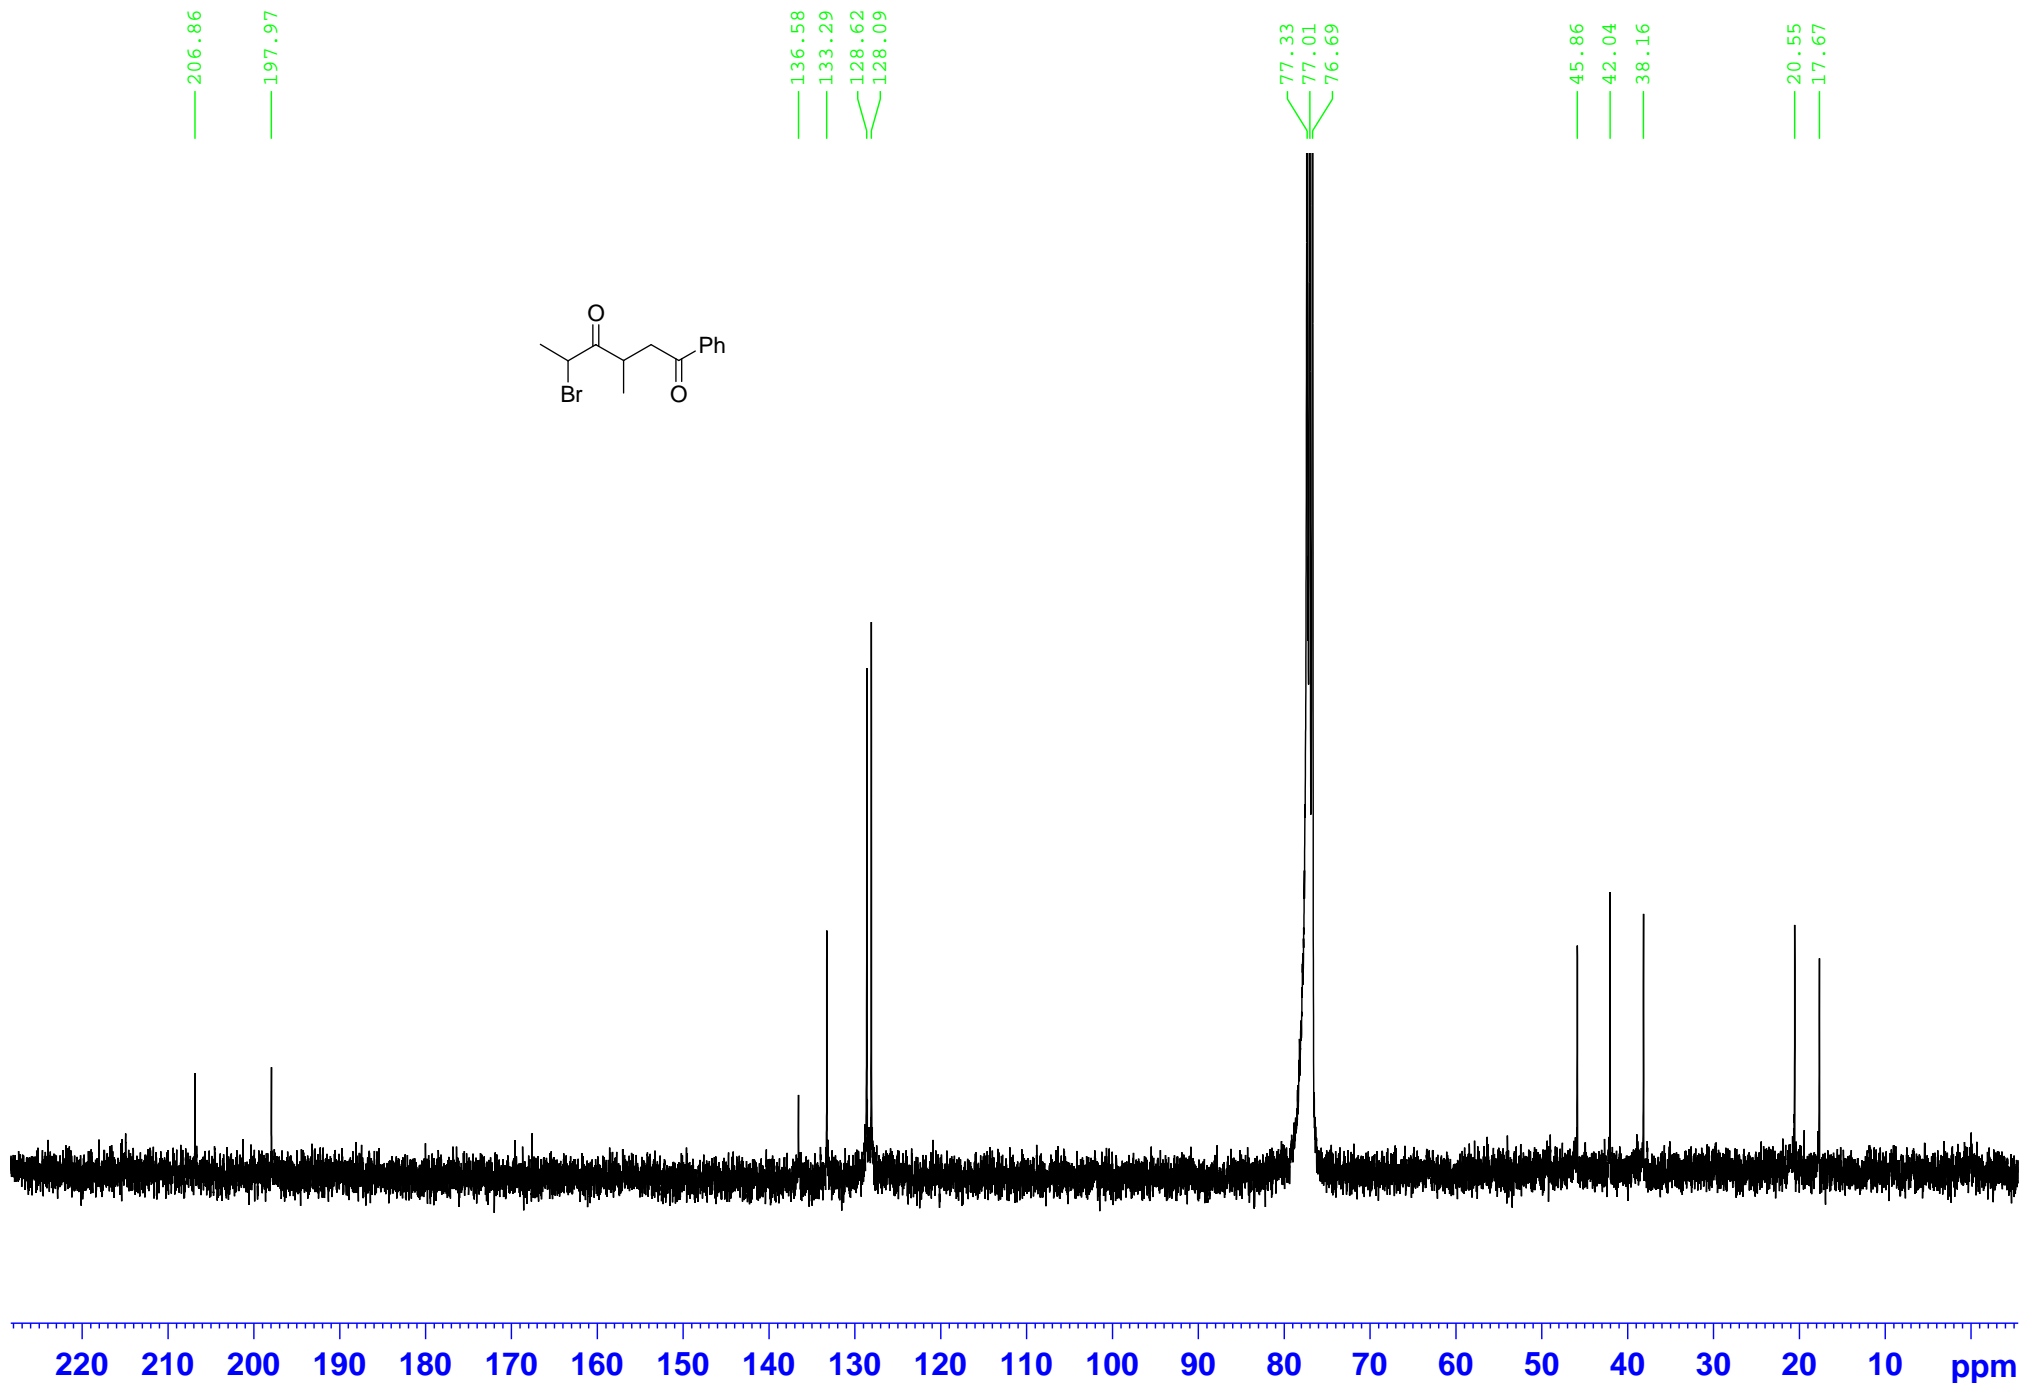

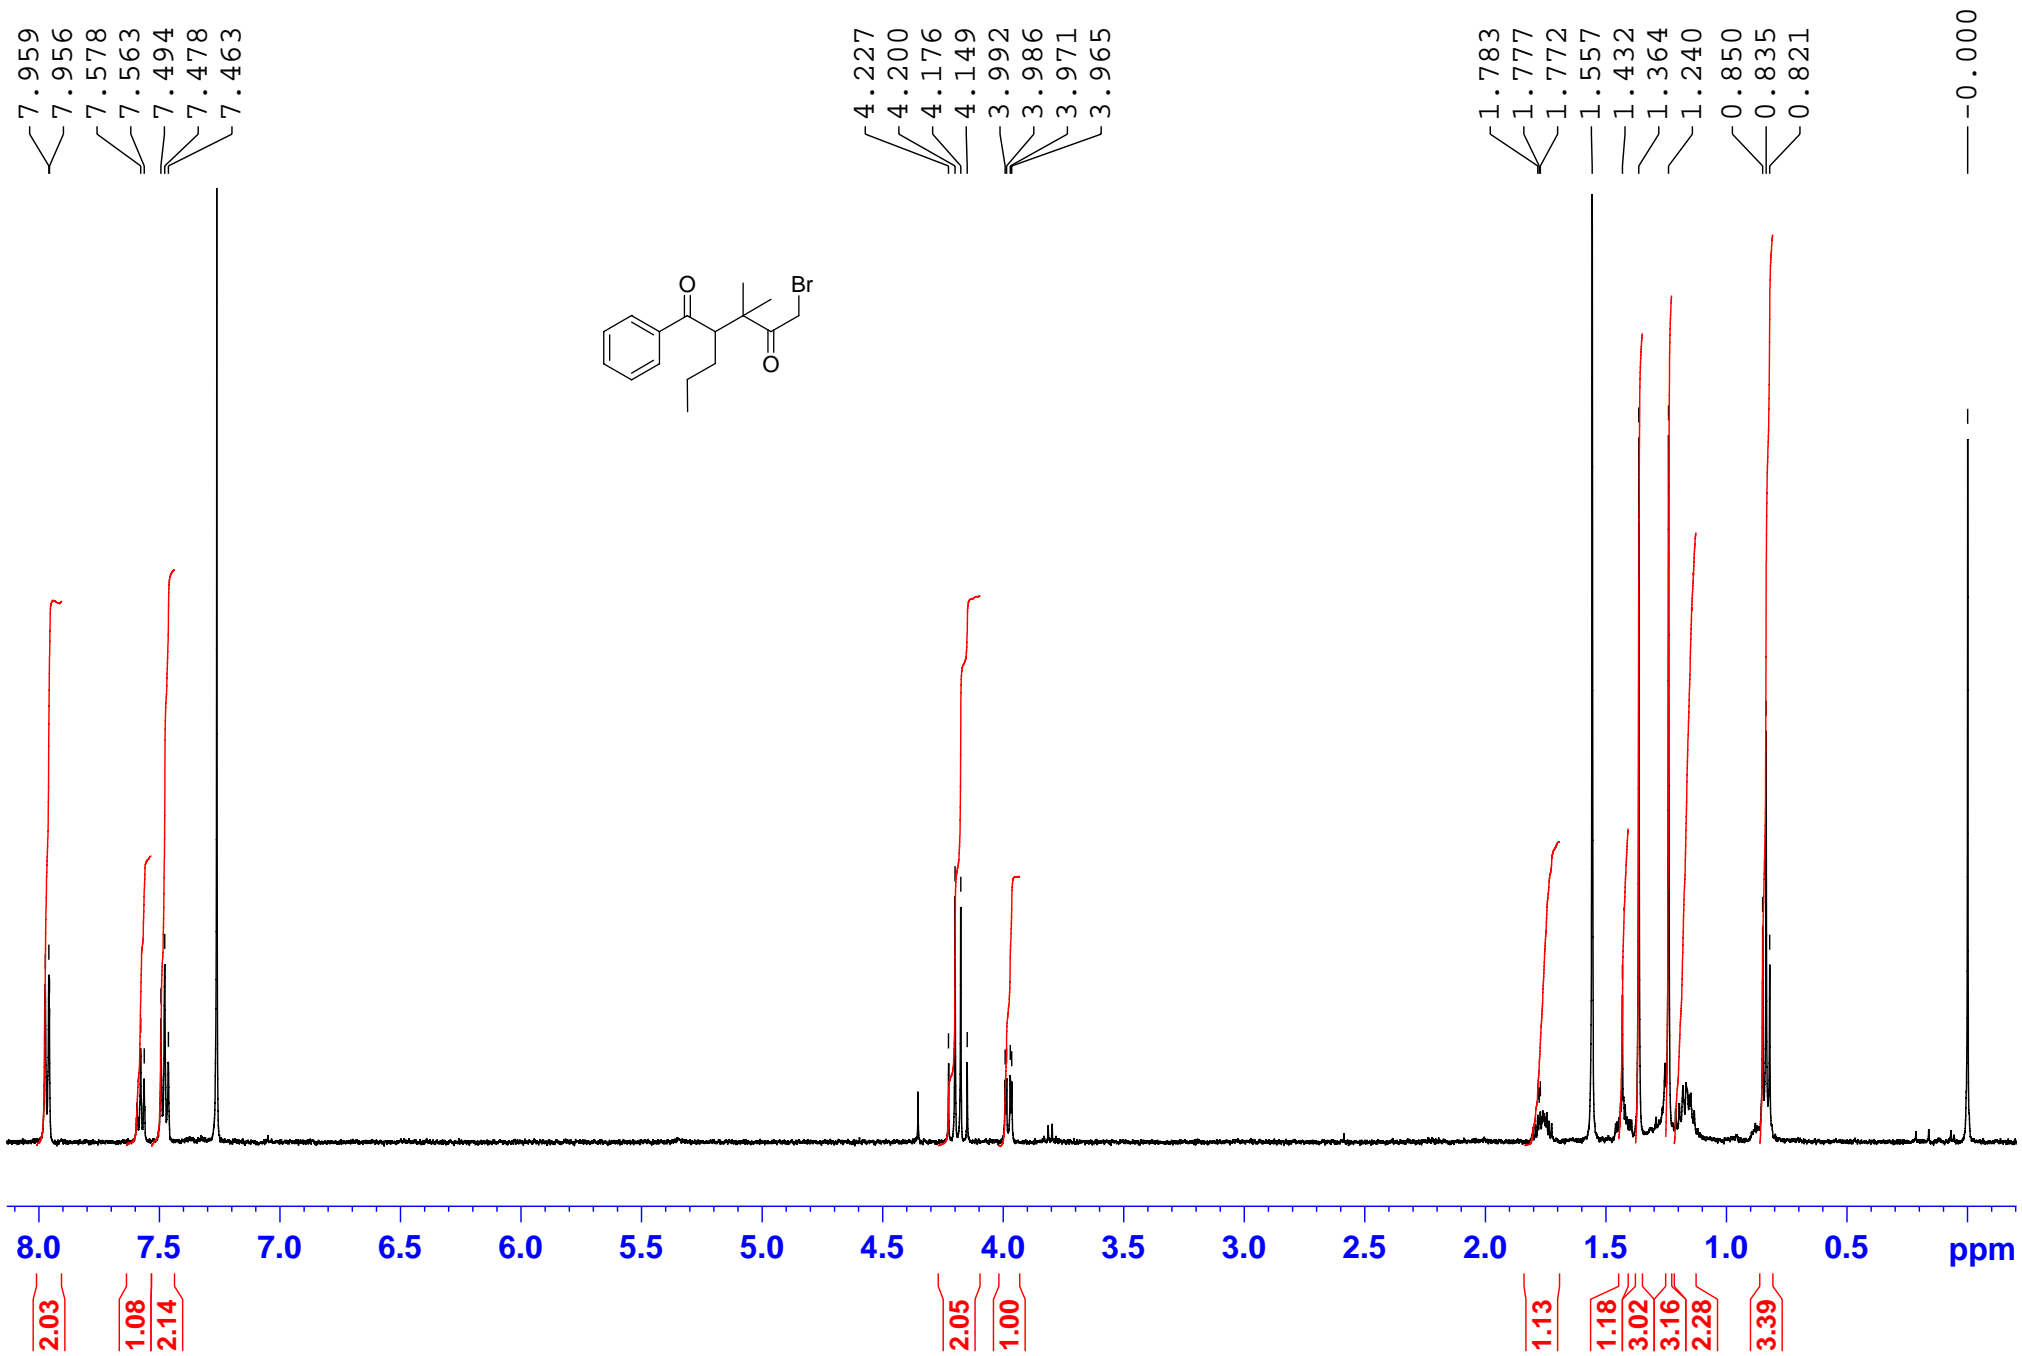

205.50  
204.63

139.08  
133.24  
128.75  
128.33

77.28  
77.02  
76.77

51.57  
50.37

32.91  
31.92  
24.31  
22.35  
21.90  
14.29

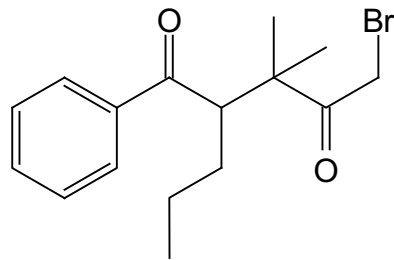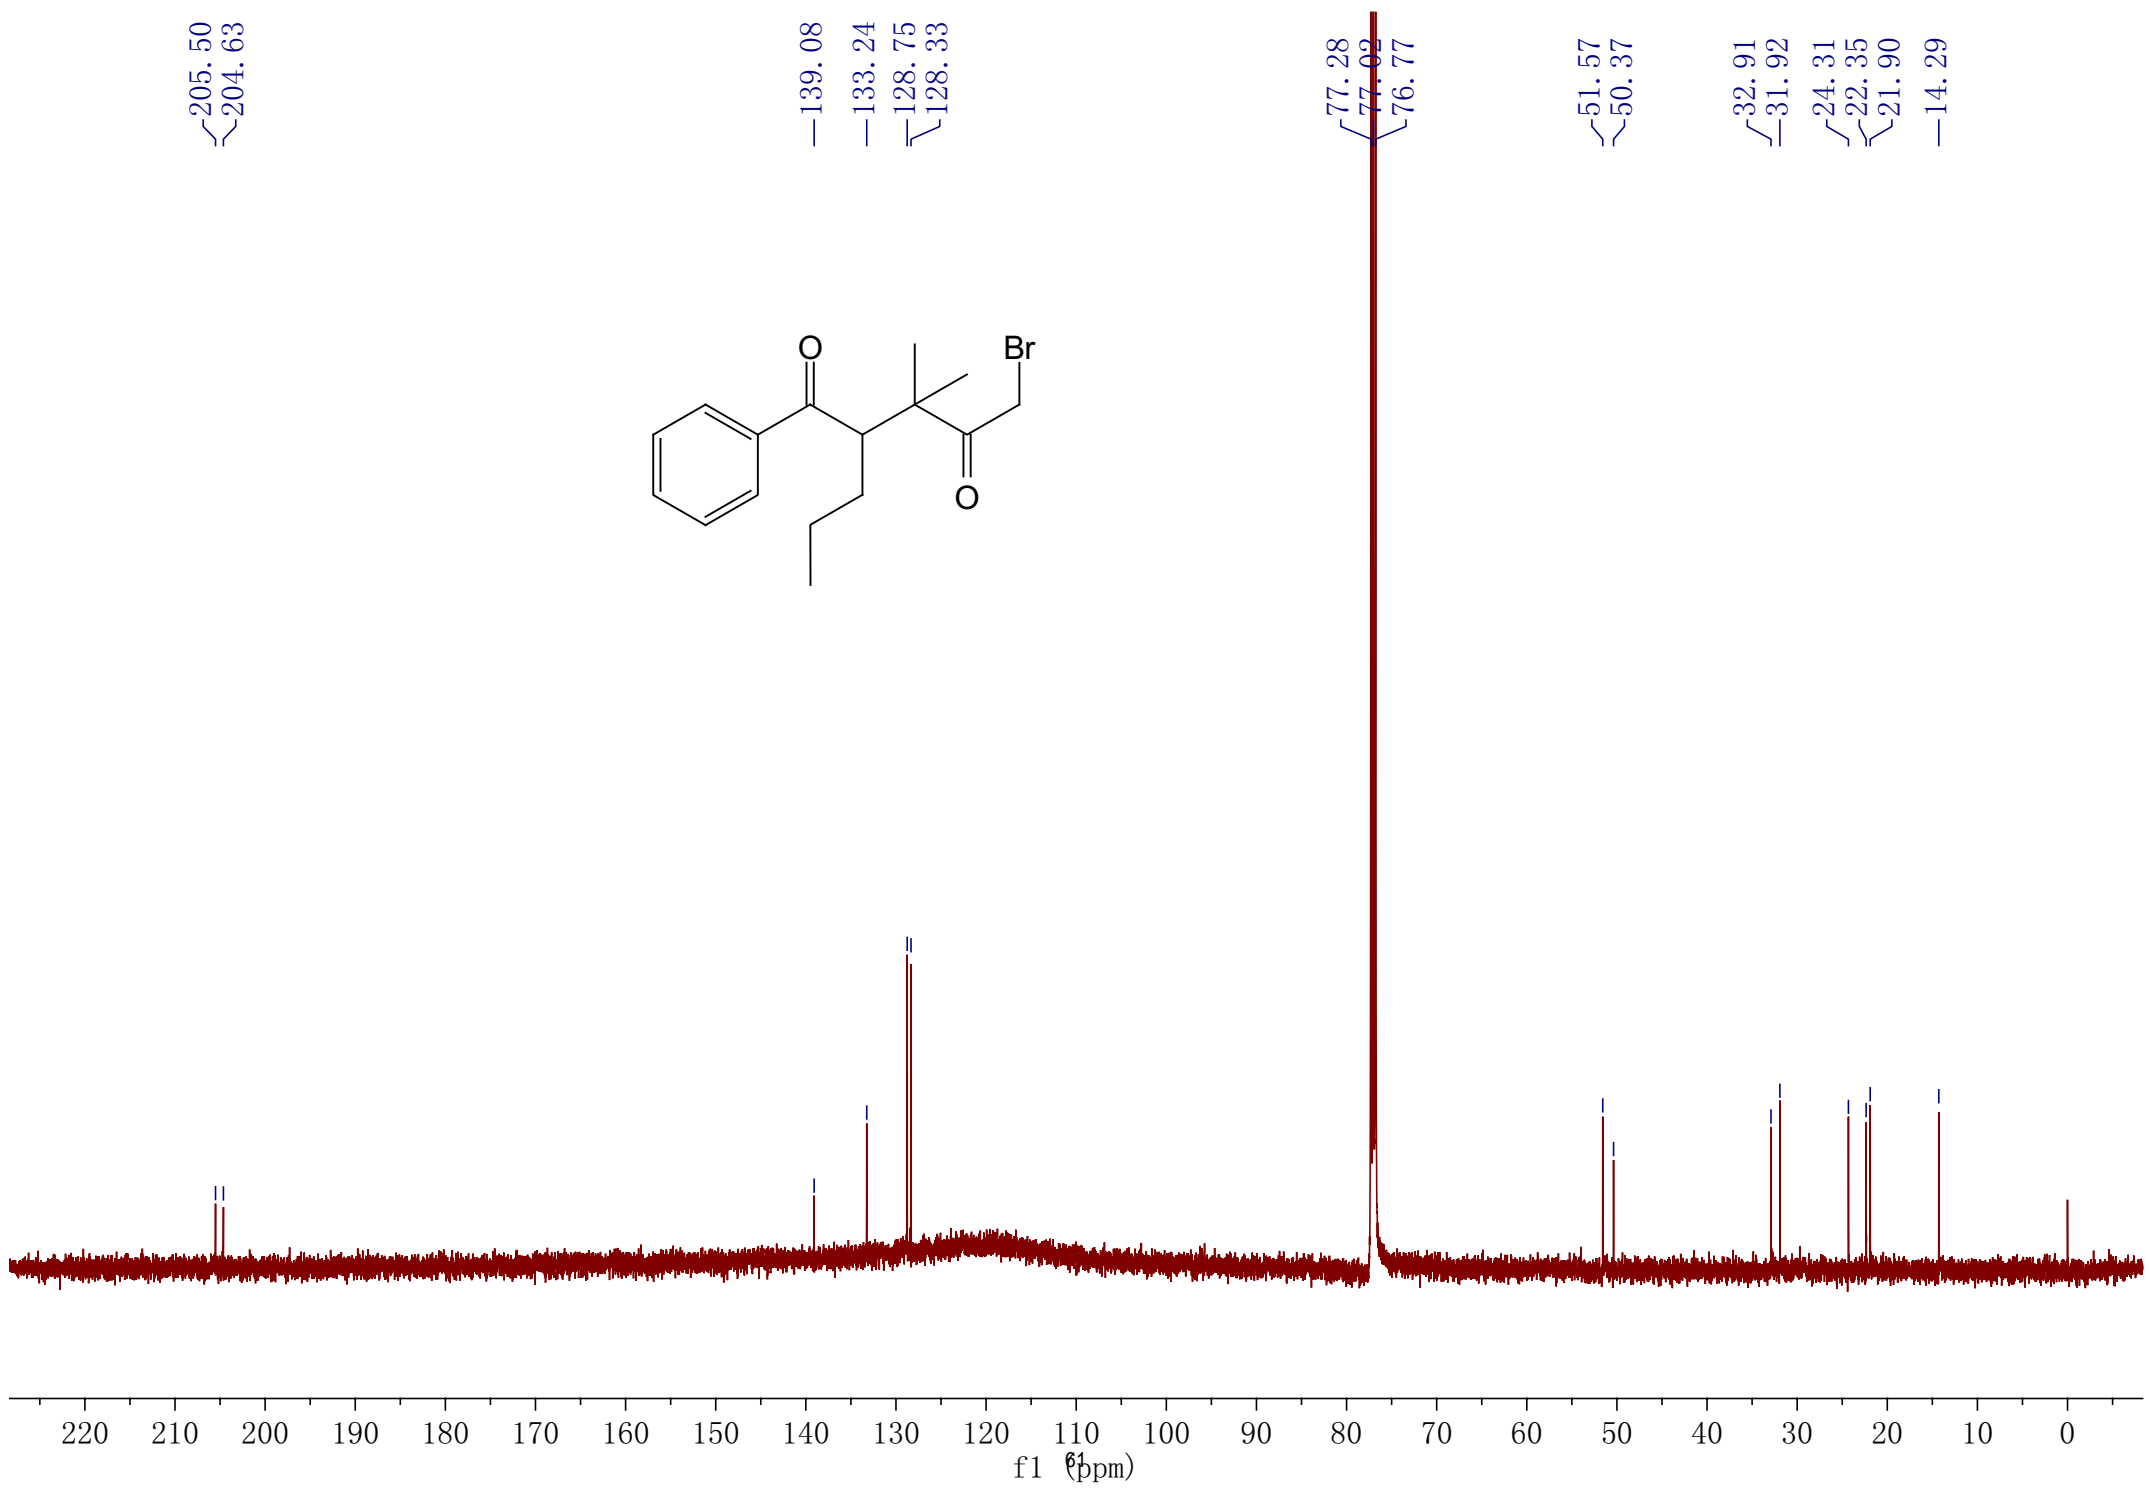

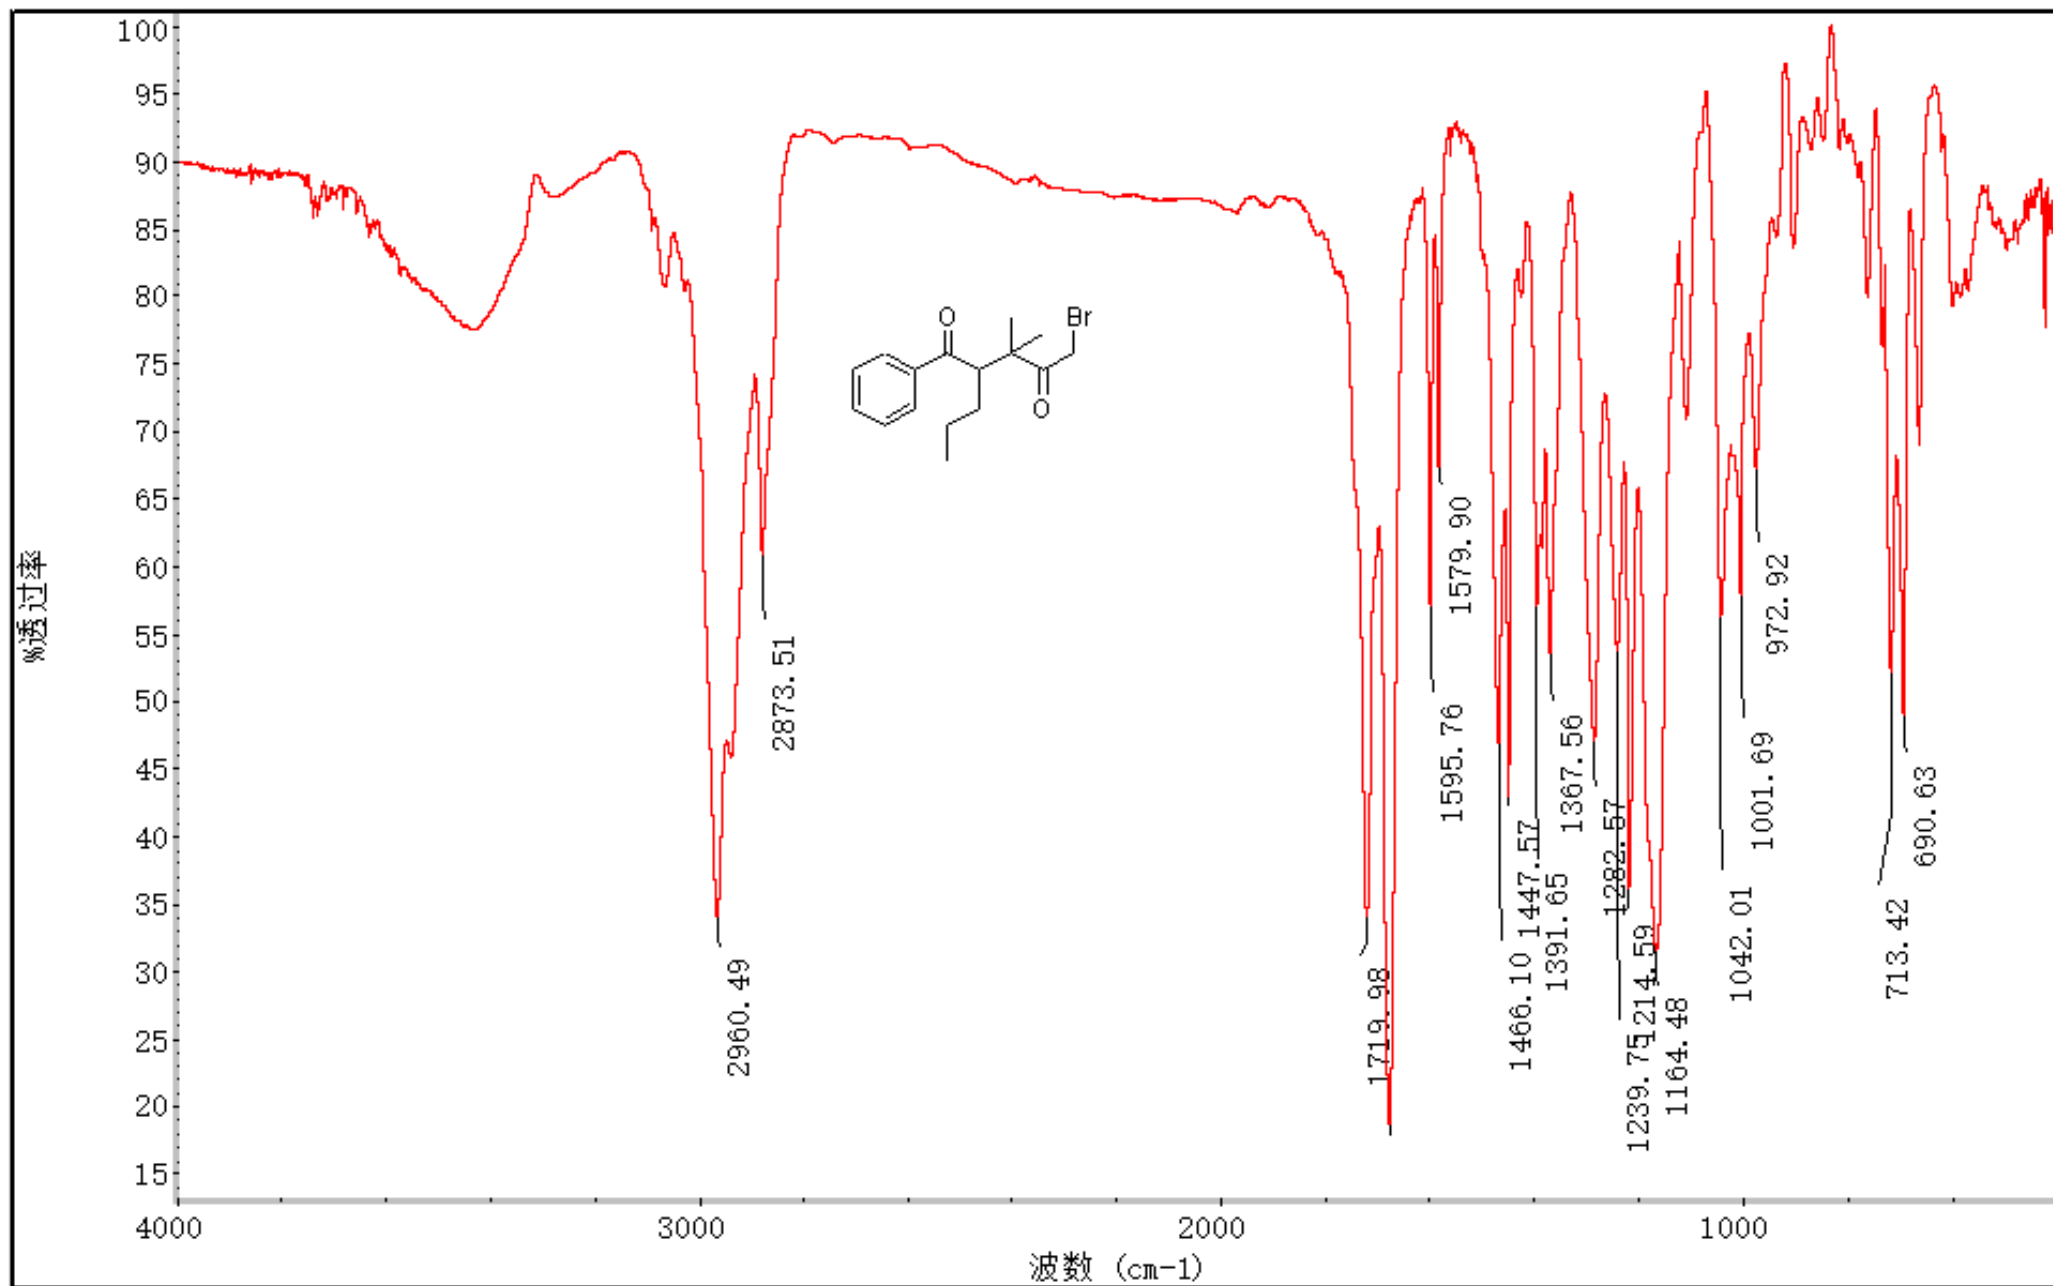

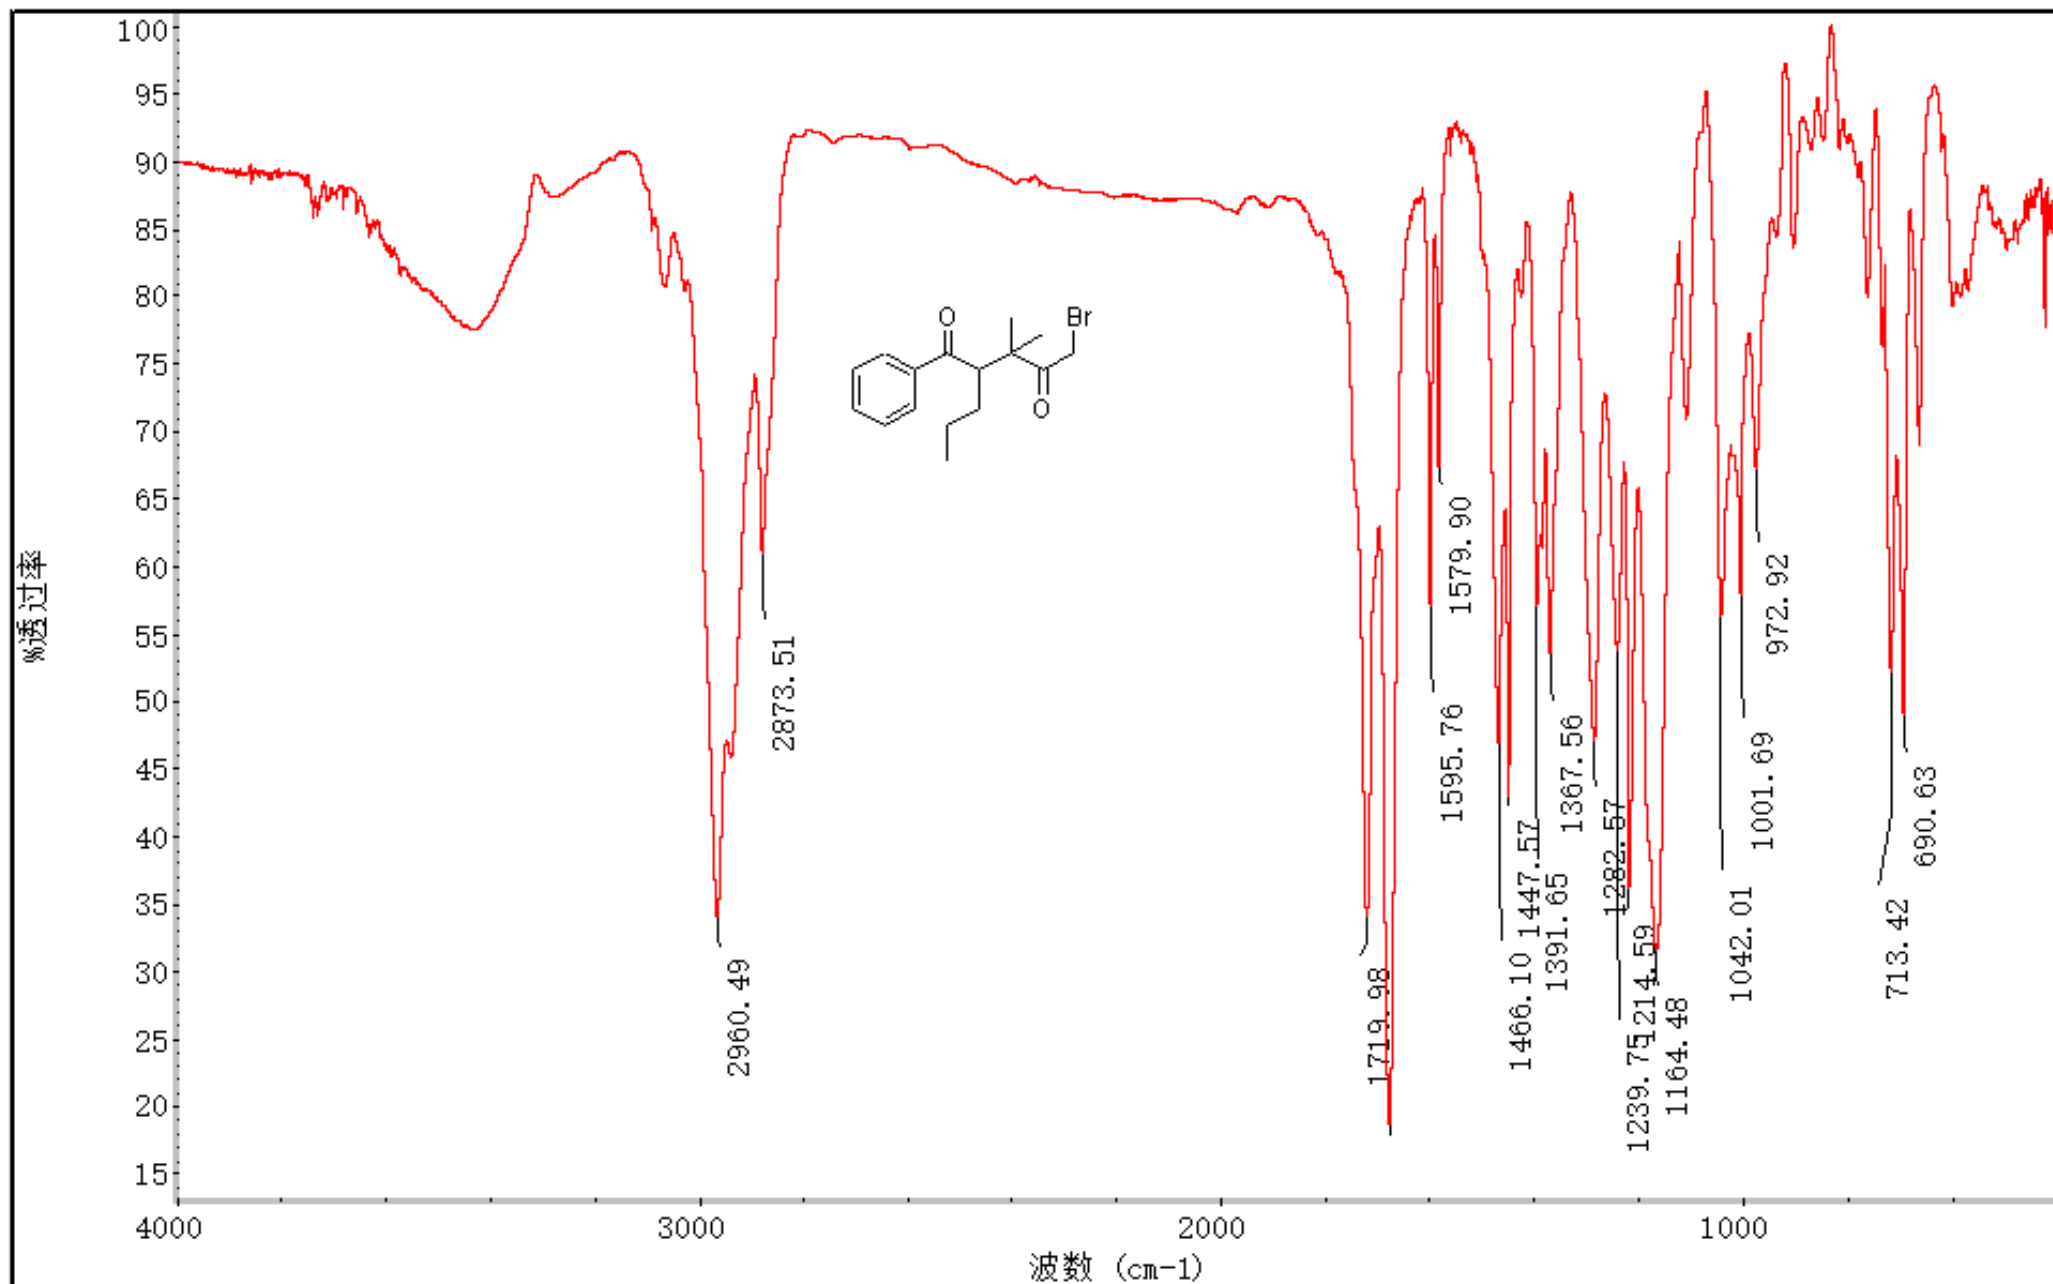

Supplement: c5ra12244a1.pdf [file c5ra12244a1.pdf]
